# Supplementary material for: Theoretical investigation of C1–C4 hydrocarbons adsorption and separation in a porous metallocavitand
Source: Royal Society of Chemistry journal article supplement (doi:10.1039/d2ra07183e), 2022-01-01
Supplement: d2ra07183e1.pdf [file d2ra07183e1.pdf]

## Electronic Supplementary Information

### Theoretical Investigation of C1-C4 Hydrocarbons Adsorption and Separation in a Porous Metallocavitand

Biswajit Mohanty<sup>a</sup>, Gopal Avashthi<sup>b\*</sup>

<sup>a</sup>Department of Chemistry, Central University of Haryana (CUH), Mahendergarh 123031, Haryana, India

<sup>b</sup>School of Sciences, P P Savani University, NH-8, GETCO, Near Biltech, Kosamba-394125, Surat, Gujarat, India

\*Authors to whom correspondence should be addressed. E-mail: [gopalavashthi@gmail.com](mailto:gopalavashthi@gmail.com)

**Table S1:** Bond length (Å) of pristine hydrocarbon guest and the encapsulated guest.

| <b>HC@PPX</b>                             | <b>BLG@PPX (Å)</b>                                           | <b>BLPG(Å)</b>                                                |
|-------------------------------------------|--------------------------------------------------------------|---------------------------------------------------------------|
| <b>CH<sub>4</sub>@PPX</b>                 | C–H: 1.104                                                   | C–H: 1.101                                                    |
| <b>C<sub>2</sub>H<sub>2</sub>@PPX</b>     | C≡C: 1.231, C–H: 1.073                                       | C≡C: 1.230, C–H: 1.073                                        |
| <b>C<sub>2</sub>H<sub>4</sub>@PPX</b>     | C=C: 1.354, C–H: 1.094                                       | C=C: 1.355, C–H: 1.094                                        |
| <b>C<sub>2</sub>H<sub>6</sub>@PPX</b>     | C–C: 1.548, C–H: 1.103                                       | C–C: 1.552, C–H: 1.103                                        |
| <b>Allene@PPX</b>                         | C=C: 1.323, C–H: 1.090                                       | C–C: 1.330, C–H: 1.094                                        |
| <b>C<sub>3</sub>H<sub>4</sub>@PPX</b>     | C–C: 1.470, C≡C: 1.230, C–H: 1.101                           | C–C: 1.477, C≡C: 1.232, C–H: 1.103                            |
| <b>C<sub>3</sub>H<sub>6</sub>@PPX</b>     | C–C: 1.514, C=C: 1.357, C–H: 1.104                           | C–C: 1.518, C=C: 1.357, C–H: 1.102                            |
| <b>C<sub>3</sub>H<sub>8</sub>@PPX</b>     | C–C: 1.547, C–H: 1.103                                       | C–C: 1.551, C–H: 1.104                                        |
| <b>1,2-butadiene</b>                      | C–C: 1.525, C=C: 1.327, C–H: 1.096,<br>C–H: 1.106            | C–C: 1.528, C=C: 1.331, C–H: 1.097<br>C–H: 1.100              |
| <b>1,3-butadiene</b>                      | C–C: 1.463, C=C: 1.362, C–H: 1.094                           | C–C: 1.468, C=C: 1.364, C–H: 1.096                            |
| <b>1-Buynes</b>                           | C–C: 1.557, C–C: 1.476, C≡C: 1.230<br>C–H: 1.069, C–H: 1.104 | C–C: 1.560, C–C: 1.480, C≡C: 1.232, C–H:<br>1.071, C–H: 1.104 |
| <b>2-Buynes</b>                           | C–C: 1.472, C≡C: 1.230, C–H: 1.105                           | C–C: 1.478, C≡C: 1.233, C–H: 1.104                            |
| <b>C<sub>4</sub>H<sub>8</sub>@PPX</b>     | C–C: 1.550, C=C: 1.355, C–H: 1.103                           | C–C: 1.558, C=C: 1.356, C–H: 1.103                            |
| <b>(E)-C<sub>4</sub>H<sub>8</sub>@PPX</b> | C–C: 1.515, C=C: 1.357, C–H: 1.103                           | C–C: 1.519, C=C: 1.357, C–H: 1.104                            |
| <b>(Z)-C<sub>4</sub>H<sub>8</sub>@PPX</b> | C–C: 1.517, C=C: 1.359, C–H: 1.103                           | C–C: 1.519, C=C: 1.360, C–H: 1.104                            |
| <b>Isobutylene@PPX</b>                    | C–C: 1.517, C=C: 1.356, C–H: 1.102                           | C–C: 1.523, C=C: 1.358, C–H: 1.104                            |
| <b>C<sub>4</sub>H<sub>10</sub>@PPX</b>    | C–C: 1.545, C–H: 1.107                                       | C–C: 1.550, C–H: 1.106                                        |
| <b>Iso-butane@PPX</b>                     | C–C: 1.542, C–H: 1.101                                       | C–C: 1.551, C–H: 1.104                                        |

**HC@PPX:** Hydrocarbon encapsulated Pillarplex host

**BLG@PPX:** Bond length of hydrocarbon encapsulated pillarplex

**BLPG:** Bond length of the pristine guest

**Table S2:** The Au-Au and N $\cdots$ H-C bond length in Å of PPX and HC@PPX.

| <b>HC@PPX</b>                             | <b>Au-Au bond distance (Å)</b> | <b>N<math>\cdots</math>H-C bond distance (Å)</b> |
|-------------------------------------------|--------------------------------|--------------------------------------------------|
| <b>CH<sub>4</sub>@PPX</b>                 | 3.141                          | 2.884                                            |
| <b>C<sub>2</sub>H<sub>2</sub>@PPX</b>     | 3.150                          | 2.582                                            |
| <b>C<sub>2</sub>H<sub>4</sub>@PPX</b>     | 3.156                          | 2.807                                            |
| <b>C<sub>2</sub>H<sub>6</sub>@PPX</b>     | 3.148                          | 2.819                                            |
| <b>Allene@PPX</b>                         | 3.209                          | 2.427                                            |
| <b>C<sub>3</sub>H<sub>4</sub>@PPX</b>     | 3.154                          | 2.616                                            |
| <b>C<sub>3</sub>H<sub>6</sub>@PPX</b>     | 3.125                          | 2.676                                            |
| <b>C<sub>3</sub>H<sub>8</sub>@PPX</b>     | 3.144                          | 2.611                                            |
| <b>1,2-butadiene</b>                      | 3.132                          | 2.591                                            |
| <b>1,3-butadiene</b>                      | 3.141                          | 2.687                                            |
| <b>1-Buynne</b>                           | 3.128                          | 2.735                                            |
| <b>2-Buynne</b>                           | 3.123                          | 2.891                                            |
| <b>C<sub>4</sub>H<sub>8</sub>@PPX</b>     | 3.150                          | 2.547                                            |
| <b>(E)-C<sub>4</sub>H<sub>8</sub>@PPX</b> | 3.109                          | 2.714                                            |
| <b>(Z)-C<sub>4</sub>H<sub>8</sub>@PPX</b> | 3.198                          | 2.681                                            |
| <b>Isobutylene@PPX</b>                    | 3.170                          | 2.766                                            |
| <b>C<sub>4</sub>H<sub>10</sub>@PPX</b>    | 3.138                          | 2.621                                            |
| <b>Isobutane@PPX</b>                      | 3.245                          | 2.348                                            |

**Table S3:** Deformation energy of the guest molecule, charge transfer from guest hydrocarbon to PPX host, electronic charge transfers from Au atom, change in enthalpy ( $\Delta H$ ), and change in entropy ( $\Delta S$ ).

| Gas Molecules                     | Deformation Energy of Guest (kcal/mol) | Charge transfer G→H (e <sup>-</sup> ) | Charge transfer from Au (e <sup>-</sup> ) | $\Delta S$ (kcal/mol* kelvin) |
|-----------------------------------|----------------------------------------|---------------------------------------|-------------------------------------------|-------------------------------|
| CH <sub>4</sub>                   | 0.023                                  | 0.052                                 | 0.015                                     | -0.028                        |
| C <sub>2</sub> H <sub>2</sub>     | 0.002                                  | 0.045                                 | 0.015                                     | -0.022                        |
| C <sub>2</sub> H <sub>4</sub>     | 0.014                                  | 0.072                                 | 0.019                                     | -0.038                        |
| C <sub>2</sub> H <sub>6</sub>     | 0.052                                  | 0.096                                 | 0.021                                     | -0.039                        |
| Allene                            | 0.201                                  | 0.075                                 | 0.013                                     | -0.045                        |
| C <sub>3</sub> H <sub>4</sub>     | 0.112                                  | 0.075                                 | 0.014                                     | -0.041                        |
| C <sub>3</sub> H <sub>6</sub>     | 0.122                                  | 0.108                                 | 0.023                                     | -0.041                        |
| C <sub>3</sub> H <sub>8</sub>     | 0.185                                  | 0.119                                 | 0.026                                     | -0.044                        |
| 1,2-butadiene                     | 0.105                                  | 0.099                                 | 0.021                                     | -0.042                        |
| 1,3-butadiene                     | 0.085                                  | 0.105                                 | 0.023                                     | -0.042                        |
| 1-butyne                          | 0.033                                  | 0.093                                 | 0.024                                     | -0.042                        |
| 2-butyne                          | 0.138                                  | 0.070                                 | 0.013                                     | -0.043                        |
| C <sub>4</sub> H <sub>8</sub>     | 0.594                                  | 0.118                                 | 0.024                                     | -0.046                        |
| (E)-C <sub>4</sub> H <sub>8</sub> | 0.122                                  | 0.113                                 | 0.025                                     | -0.045                        |
| (Z)-C <sub>4</sub> H <sub>8</sub> | 0.133                                  | 0.119                                 | 0.025                                     | -0.044                        |
| Isobutylene                       | 0.181                                  | 0.115                                 | 0.021                                     | -0.050                        |
| C <sub>4</sub> H <sub>10</sub>    | 0.172                                  | 0.129                                 | 0.028                                     | -0.046                        |
| Isobutane                         | 0.786                                  | 0.129                                 | 0.019                                     | -0.052                        |

**Table S4:** Energy decomposition analysis of HC@PPX represents electrostatic energy ( $\Delta E_{\text{elct}}$ ), dispersion energy ( $\Delta E_{\text{disp}}$ ), orbital energy ( $\Delta E_{\text{orb}}$ ), and Pauli's repulsion ( $\Delta E_{\text{pau}}$ ). The energy values are given in the kcal/mol unit. The percentage of contribution of each attractive term is given in the parenthesis.

| <b>Gas Molecules</b>                  | <b><math>\Delta E_{\text{elct}}</math><br/>(kcal/mol)</b> | <b><math>\Delta E_{\text{disp}}</math><br/>(kcal/mol)</b> | <b><math>\Delta E_{\text{orb}}</math><br/>(kcal/mol)</b> | <b><math>\Delta E_{\text{Pau}}</math><br/>(kcal/mol)</b> |
|---------------------------------------|-----------------------------------------------------------|-----------------------------------------------------------|----------------------------------------------------------|----------------------------------------------------------|
| <b>CH<sub>4</sub></b>                 | -4.6 (22.5)                                               | -12.4 (61.4)                                              | -3.3 (16.1)                                              | 9.7                                                      |
| <b>C<sub>2</sub>H<sub>2</sub></b>     | -7.5 (25.1)                                               | -16.4 (54.8)                                              | -6.0 (20.1)                                              | 15.8                                                     |
| <b>C<sub>2</sub>H<sub>4</sub></b>     | -8.7 (24.7)                                               | -19.9 (56.2)                                              | -6.8 (19.1)                                              | 20.7                                                     |
| <b>C<sub>2</sub>H<sub>6</sub></b>     | -11.8 (28.3)                                              | -22.6 (54.0)                                              | -7.4 (17.7)                                              | 25.7                                                     |
| <b>Allene</b>                         | -19.9 (34.3)                                              | -26.6 (45.8)                                              | -11.5 (19.9)                                             | 41.6                                                     |
| <b>C<sub>3</sub>H<sub>4</sub></b>     | -15.0 (30.1)                                              | -25.8 (51.9)                                              | -9.0 (18.0)                                              | 31.8                                                     |
| <b>C<sub>3</sub>H<sub>6</sub></b>     | -14.2 (28.0)                                              | -27.9 (55.2)                                              | -8.5 (16.8)                                              | 28.4                                                     |
| <b>C<sub>3</sub>H<sub>8</sub></b>     | -16.2 (28.8)                                              | -30.2 (53.7)                                              | -9.9 (17.5)                                              | 33.8                                                     |
| <b>1,2-butadiene</b>                  | -17.2 (29.2)                                              | -32.8 (55.7)                                              | -8.9 (15.1)                                              | 34.3                                                     |
| <b>1,3-butadiene</b>                  | -16.2 (27.6)                                              | -32.5 (55.5)                                              | -10.0 (16.9)                                             | 34.8                                                     |
| <b>1-butyne</b>                       | -13.8 (25.5)                                              | -30.8 (57.0)                                              | -9.5 (17.5)                                              | 30.6                                                     |
| <b>2-butyne</b>                       | -14.1 (26.3)                                              | -31.1 (58.3)                                              | -8.1 (15.4)                                              | 29.4                                                     |
| <b>C<sub>4</sub>H<sub>8</sub></b>     | -19.2 (30.1)                                              | -34.3 (53.5)                                              | -10.5 (16.4)                                             | 39.1                                                     |
| <b>(E)-C<sub>4</sub>H<sub>8</sub></b> | -16.2 (26.0)                                              | -36.2 (58.2)                                              | -9.8 (15.8)                                              | 34.5                                                     |
| <b>(Z)-C<sub>4</sub>H<sub>8</sub></b> | -17.8 (27.9)                                              | -36.1 (56.6)                                              | -9.9 (15.5)                                              | 34.5                                                     |
| <b>Isobutylene</b>                    | -24.4 (32.6)                                              | -36.5 (48.8)                                              | -13.9 (18.6)                                             | 49.2                                                     |
| <b>C<sub>4</sub>H<sub>10</sub></b>    | -19.0(27.7)                                               | -37.8 (55.1)                                              | -11.8 (17.2)                                             | 40.8                                                     |
| <b>Isobutane</b>                      | -26.8 (34.0)                                              | -37.8 (47.9)                                              | -14.2 (18.1)                                             | 57.9                                                     |

**Table S5.** Uptake of C1-C3 HCs on various materials at 298 K temperature and 1 bar pressure.

For those ambient conditions data is not available the nearest conditions are considered.

| Host                                                                          | Hydrocarbons            |                                       |                                       |                                       |                               |                                       |                                       | Cond.        | Ref.      |
|-------------------------------------------------------------------------------|-------------------------|---------------------------------------|---------------------------------------|---------------------------------------|-------------------------------|---------------------------------------|---------------------------------------|--------------|-----------|
|                                                                               | CH <sub>4</sub>         | C <sub>2</sub> H <sub>2</sub>         | C <sub>2</sub> H <sub>4</sub>         | C <sub>2</sub> H <sub>6</sub>         | C <sub>3</sub> H <sub>4</sub> | C <sub>3</sub> H <sub>6</sub>         | C <sub>3</sub> H <sub>8</sub>         |              |           |
| Ni <sub>2</sub> (BTEC)(bipy) <sub>3</sub>                                     |                         | 3.42                                  | 0.35                                  |                                       |                               |                                       |                                       | 298/1        | [93]      |
| PCN-250/MIL-100                                                               |                         | 4.5/2.0                               |                                       |                                       |                               |                                       |                                       | 295/0.7      | [94]      |
| PCN-207-FA                                                                    | 0.82                    | 3.07                                  | 2.27                                  | 2.37                                  |                               | 2.17                                  |                                       | 273/ 1       | [85]      |
| UPC-98                                                                        | 0.26                    | 1.35                                  | 0.79                                  | 2.03                                  |                               | 5.2                                   | 4.34                                  | 298/1        | [69]      |
| UMCM-151/UMCM-151-F/-Cl/-NH <sub>2</sub> /-CH <sub>3</sub> /-OCH <sub>3</sub> |                         | 2.22/4.40/<br>4.03/3.91/<br>3.33/3.57 | 2.68/3.22/<br>3.01/4.37/<br>4.03/4.20 | 2.31/3.05/<br>2.99/3.69/<br>3.47/3.55 |                               | 3.07/4.72/<br>4.29/4.88/<br>4.61/4.48 | 2.98/4.36/<br>3.96/4.48/<br>4.47/4.11 | 273/1        | [70]      |
| PFC-5                                                                         |                         | 1.37                                  | 1.17                                  | 1.15                                  |                               |                                       |                                       | 298/1        | [71]      |
| Mg-MOF-74/tpt-Mg-MOF-74                                                       |                         |                                       |                                       | 6.1/5.4                               |                               |                                       | 6.6/6.1                               | 298/1        | [66]      |
| MFM-300(In)                                                                   |                         | 4.5                                   | 4.9                                   | 5.1                                   | 6.3                           | 5.4                                   | 4.8                                   | 293/ 1       | [81]      |
| MOF-801                                                                       |                         |                                       |                                       |                                       |                               | 3.5                                   | 3.2                                   | 303/1        | [86]      |
| NKM-101a                                                                      |                         | 3.75                                  | 2.90                                  | 2.92                                  |                               |                                       | 3.34                                  | 298/1        | [92]      |
| FIR-125/126                                                                   | 0.54/0.74               | 1.69/2.59                             | 1.33/2.12                             | 1.42/1.88                             |                               |                                       | 1.36/1.52                             | 298/1        | [72]      |
| ZJNU-120-Sm                                                                   | 0.47                    | 3.07                                  | 2.36                                  | 2.80                                  |                               |                                       |                                       | 298/1        | [95]      |
| NOTT-101/-IPA                                                                 | 5.93/5.98               |                                       |                                       |                                       |                               |                                       |                                       | 298/5        | [68]      |
| PAN-p1/-m1/<br>-m2/-m3                                                        | 0.91/0.62/<br>0.72/0.71 |                                       |                                       | 3.75/2.53/<br>2.63/2.71               |                               |                                       | 5.11/3.42/<br>3.55/4.01               | 298/1        | [96]      |
| Ni(TMBDC)(DABCO) <sub>0.5</sub>                                               | 0.4                     |                                       |                                       | 5.81                                  |                               |                                       | 5.54                                  | 298/1        | [97]      |
| NUM-9a                                                                        |                         | 2.32                                  | 2.36                                  | 2.48                                  |                               |                                       |                                       | 298/1        | [73]      |
| Zr-OBBA/-SDBA/<br>JLU-Liu45                                                   | 0.15/0.56/<br>0.69      | 0.99/4.51/<br>2.52                    | 0.54/1.82/<br>1.99                    | 0.5/2.07/<br>3.78                     |                               |                                       | 0.78/2.45/<br>3.79                    | 298/1        | [74]      |
| PFC-1/-2                                                                      | 0.30/0.48               | 1.27/2.13                             | 1.30/1.83                             |                                       |                               |                                       |                                       | 298/1        | [75]      |
| Cu-CPAH                                                                       | 1.28                    | 5.88                                  |                                       |                                       |                               |                                       |                                       | 298/1        | [98]      |
| NUM-7                                                                         |                         | 2.47                                  | 2.61                                  | 2.85                                  |                               |                                       |                                       | 298/1        | [76]      |
| PAN-5H/-5F/<br>-2F/-2(CF <sub>3</sub> )                                       | 0.59/0.33/<br>0.76/0.75 |                                       | 2.25/1.25/<br>3.20/3.10               | 2.35/1.30/<br>3.64/3.53               |                               |                                       | 3.63/1.93/<br>4.62/4.60               | 298/1        | [99]      |
| Gly@HKUST-1s                                                                  | 0.9                     |                                       |                                       | 6.47                                  |                               |                                       | 7.80                                  | 298/1        | [100]     |
| UTSA-220                                                                      | 0.59                    | 3.40                                  | 2.53                                  | 2.14                                  |                               |                                       |                                       | 298/1        | [101]     |
| Cu-F-pymo                                                                     |                         | 0.10                                  |                                       |                                       |                               |                                       |                                       | 298/1        | [77]      |
| Dps-VCo-BDC/tpt-VCo-BDC                                                       | 1.07/1.29               | 10.44/7.85                            | 7.41/6.29                             | 8.03/6.69                             |                               |                                       |                                       | 298/1        | [82]      |
| MOF 1/MOF 2                                                                   | 0.26/0.17               | 1.07/3.48                             | 0.66/1.74                             | 0.49/1.74                             |                               |                                       |                                       | 298/1        | [78]      |
| UPC-99                                                                        | 0.44                    | 1.92                                  | 1.98                                  | 2.72                                  |                               | 5.33                                  | 4.85                                  | 298/1        | [79]      |
| BSF-2                                                                         | 0.29                    |                                       |                                       | 1.52                                  |                               |                                       | 2.21                                  | 298/1        | [102]     |
| NPU-1/-2/-3                                                                   |                         | 5.1/4.03/<br>2.58                     | 4.2/3.45/<br>2.22                     | 4.5/4.44/<br>3.36                     |                               |                                       |                                       | 298/1        | [84]      |
| NbU-1                                                                         |                         | 2.72                                  | 1.65                                  | 1.56                                  |                               |                                       |                                       | 298/1        | [80]      |
| <b>PPX</b>                                                                    | <b>2.37</b>             | <b>2.80</b>                           | <b>4.26</b>                           | <b>4.22</b>                           | <b>3.60</b>                   | <b>3.57</b>                           | <b>3.12</b>                           | <b>298/1</b> | This work |

**Table S6:** A brief comparison of C4 uptake by PPX and other reported systems. The values are in the range of mmol $g^{-1}$  in the ambient conditions. For those ambient condition data is unavailable, the nearest temperature and pressures are on account.

| Host                          | (E)-C <sub>4</sub> H <sub>8</sub> | (Z)-C <sub>4</sub> H <sub>8</sub> | 1,3-<br>butadiene | C <sub>4</sub> H <sub>8</sub> | isobutylene | C <sub>4</sub> H <sub>10</sub> | isobutane  | Cond. |
|-------------------------------|-----------------------------------|-----------------------------------|-------------------|-------------------------------|-------------|--------------------------------|------------|-------|
| <b>M-Gallate (M</b>           | 1.09/1.85/                        | 0.44/0.58/                        | 1.39/1.96/        | 0.57/1.46/                    | 0.09/0.13/  | 0.08/0.17/                     | 0.07/0.08/ |       |
| <b>=Ni/Mg/Co)</b>             | 1.67                              | 0.58                              | 1.86              | 0.88                          | 0.13        | 0.31                           | 0.10       | 298/1 |
| <b>ZU-36-Co</b>               |                                   |                                   |                   | 2.35                          | 0.17        | 2.20                           | 0.12       | 298/1 |
| <b>FJI-H19</b>                | 7.53                              | 7.26                              |                   |                               |             | 7.53                           | 7.72       | 295/1 |
| <b>TMOF-1/ZU-619</b>          |                                   |                                   | 1.64/1.58         | 1.08/0.63                     | 0.20/0.30   |                                |            | 298/1 |
| <b>M<sub>2</sub>(dobdc)</b>   | 0.77/0.91/                        | 0.27/0.29/                        |                   | 0.24/0.24/                    |             |                                |            |       |
| <b>(M=Mn/Fe/Co/Ni)</b>        | 1.17/1.19                         | 0.46/0.39                         |                   | 0.34/0.34                     |             |                                |            | 328/1 |
| <b>M<sub>2</sub>(m-dobdc)</b> | 0.51/0.71/                        | 0.14/0.19/                        |                   | 0.12/0.12/                    |             |                                |            |       |
| <b>(M=Mn/Fe/Co/Ni)</b>        | 0.83/0.70                         | 0.24/0.16                         |                   | 0.14/0.10                     |             |                                |            | 328/1 |
| <b>NKM-101a</b>               |                                   |                                   | 3.54              |                               |             | 3.08                           | 2.54       | 298/1 |
| <b>PPX</b>                    | 2.50                              | 2.60                              | 2.95              | 2.50                          | 2.4         | 2.32                           | 1.93       | 298/1 |

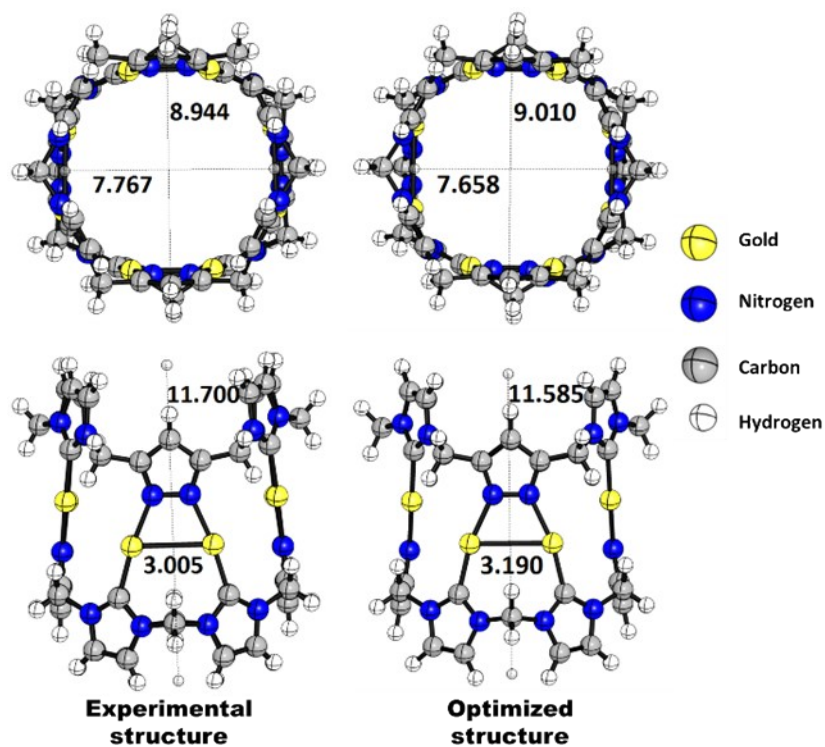

**Figure S1:** Height, width and Au-Au bond length of experimental and optimized pillarplex (PPX) geometry.



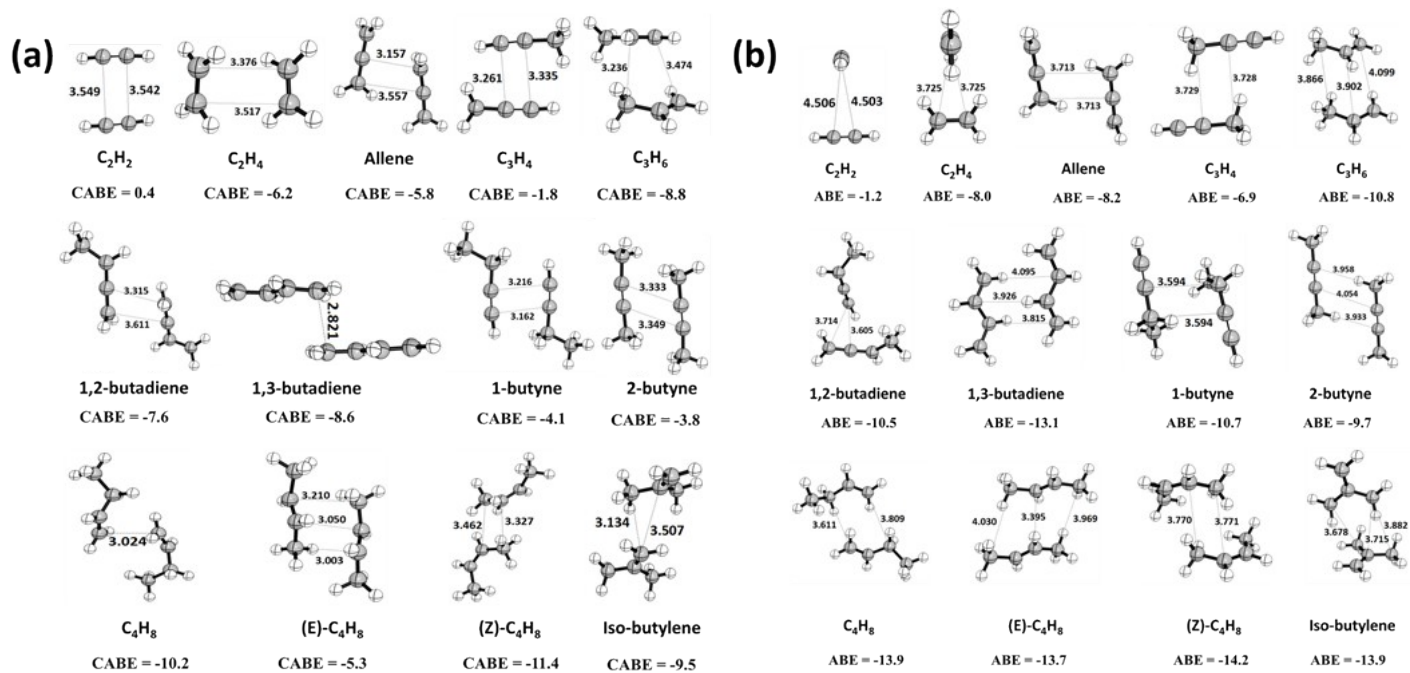

**Figure S2:** The constrained dimer (a) and relax dimer (b) structure of HCs and their corresponding C-C bond distance, cooperative adsorption binding energy (CABE) and adsorption binding energy (ABE). The bond distances are given in Å unit and the energy terms are in kcal/mol.

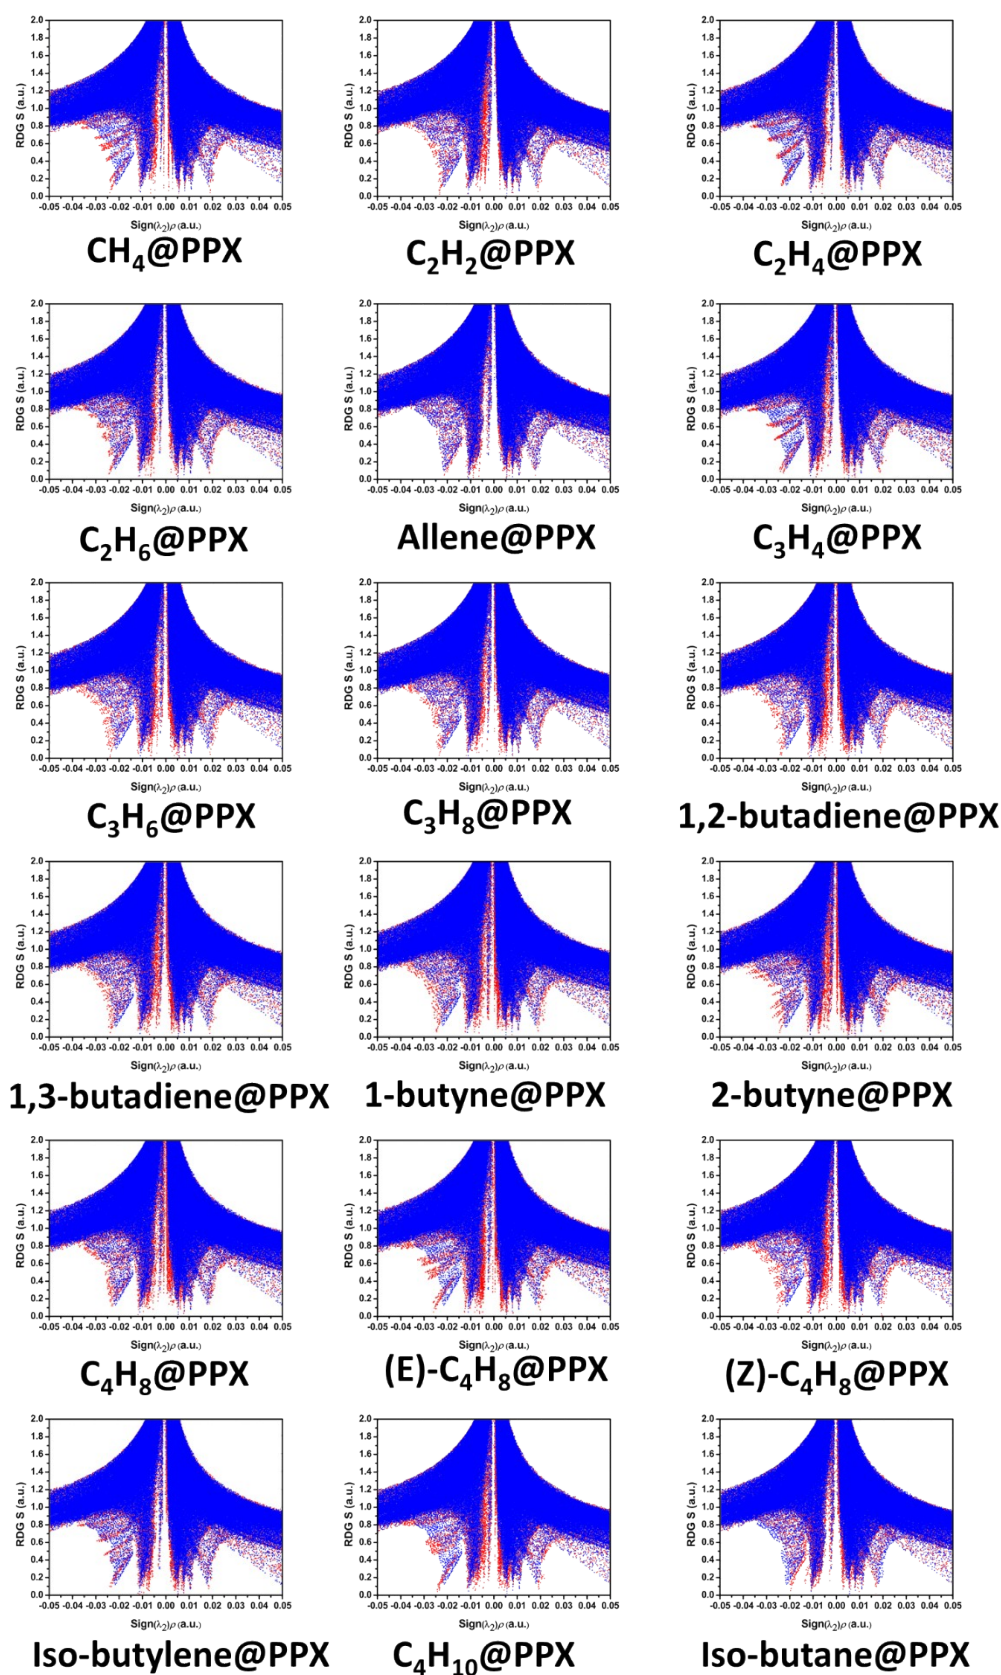

**Figure S3:** The superimposed NCI-RDG image of PPX and HC@PPX. The red and blue colour represents HC@PPX and pristine PPX respectively.

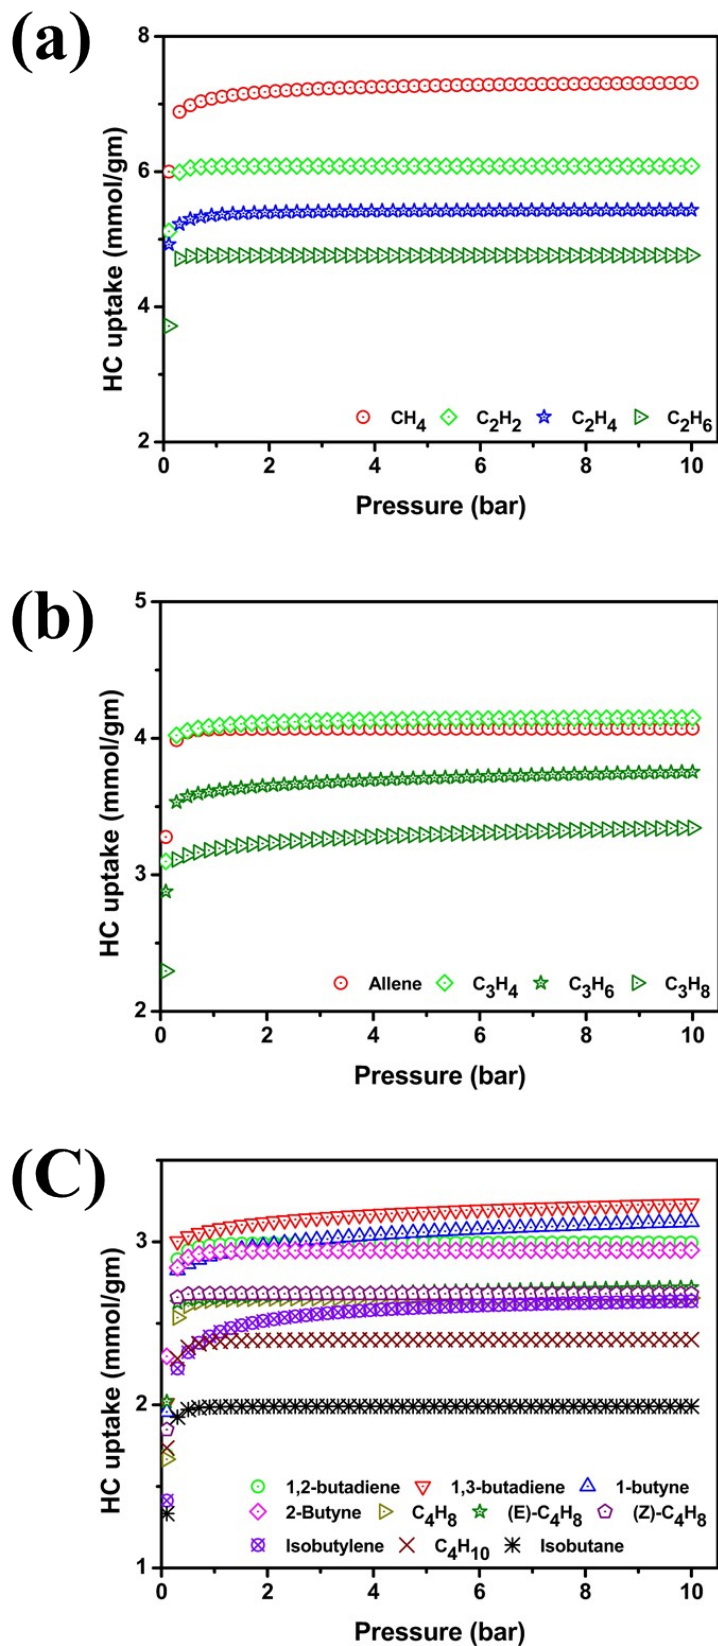

**Figure S4:** Grand canonical Monte Carlo simulation of (a) C1/C2, (b) C3 and (c) C4 with PPX at 77 K and 0.1-10 bar pressure.

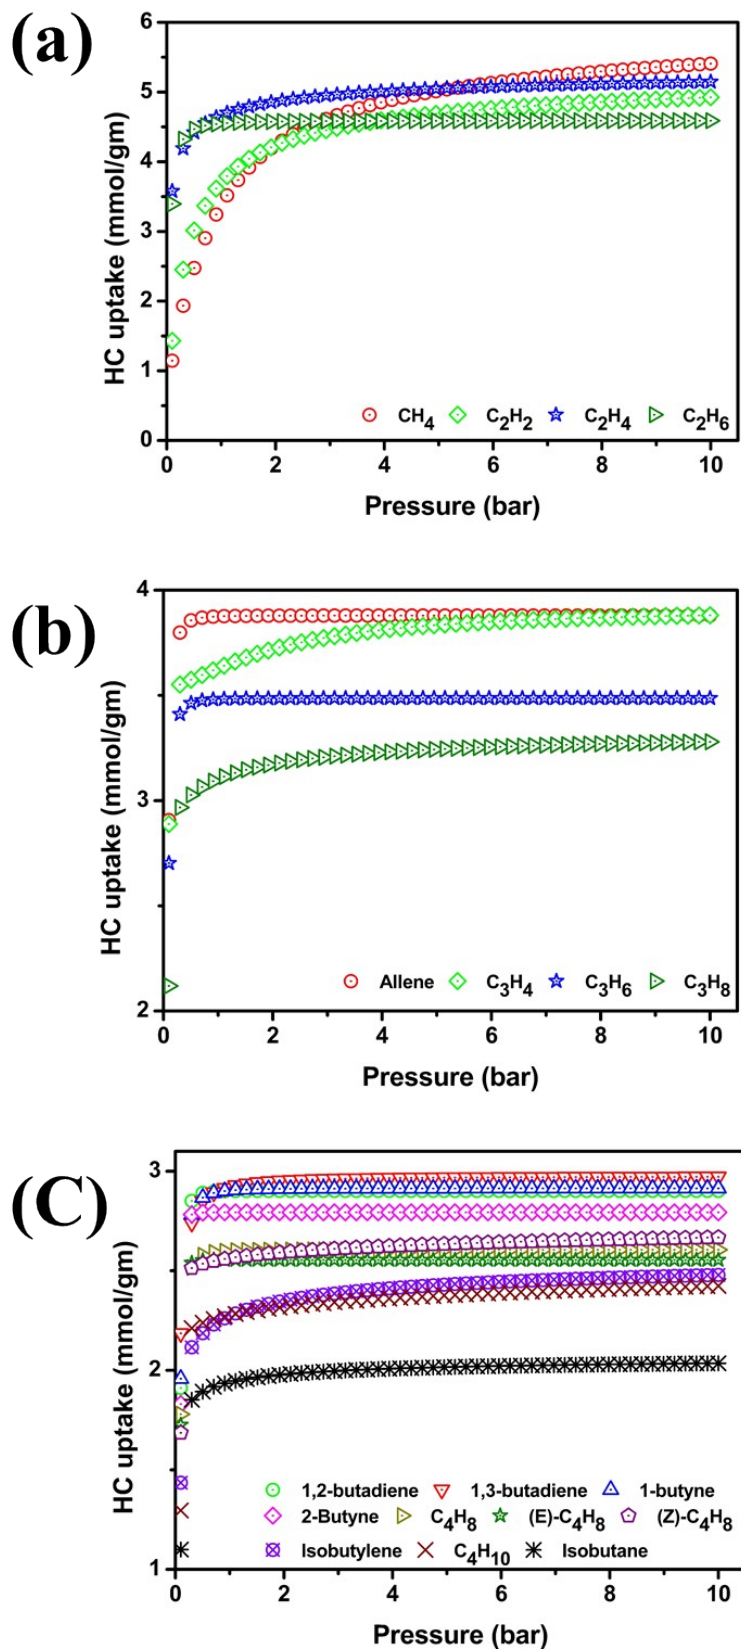

**Figure S5:** Grand canonical Monte Carlo simulation of (a) C1/C2, (b) C3 and (c) C4 with PPX at 273 K and 0.1-10 bar pressure.

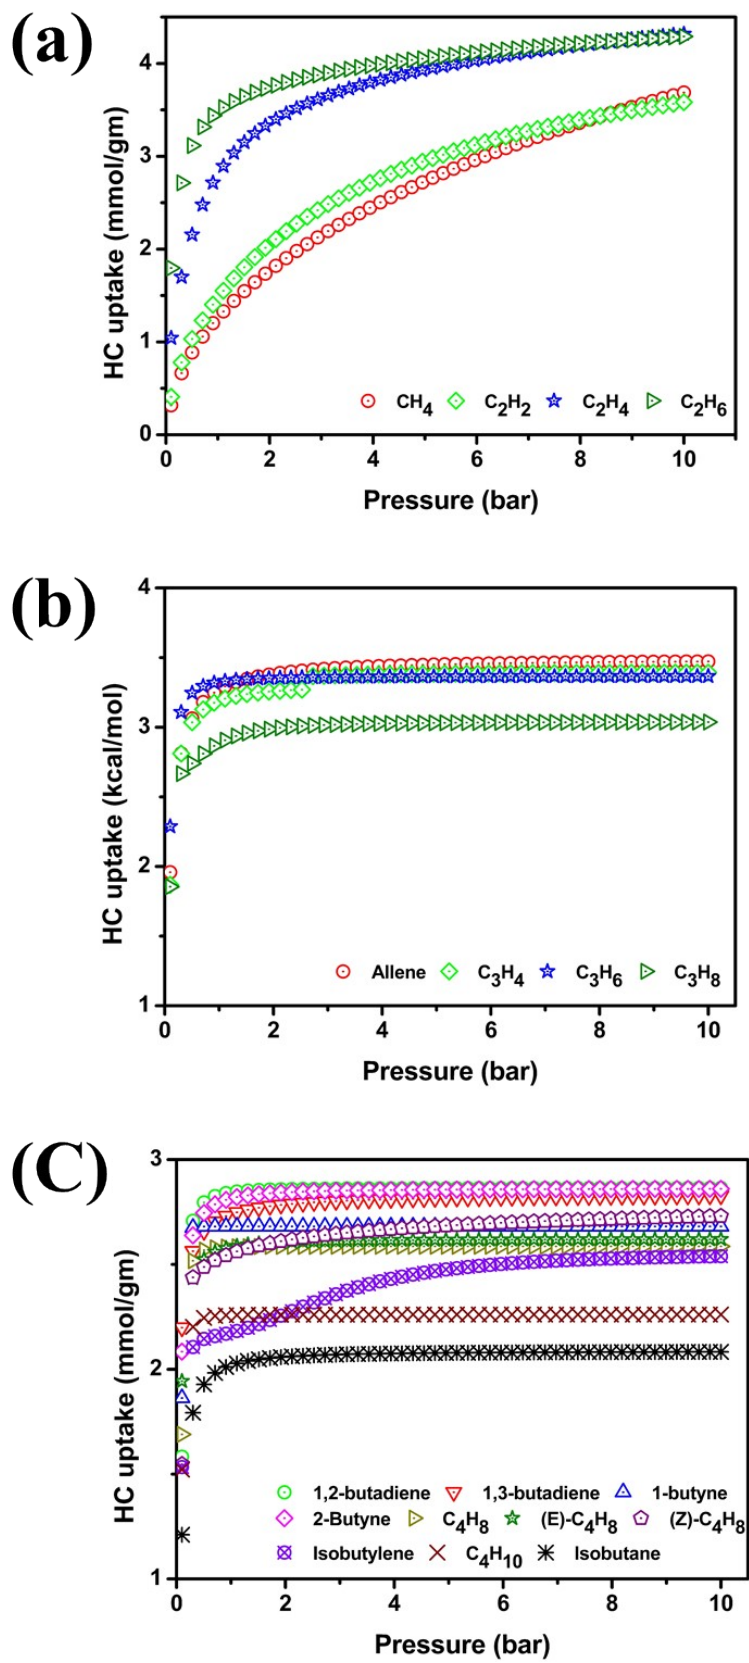

**Figure S6:** Grand canonical Monte Carlo simulation of (a) C1/C2, (b) C3 and (c) C4 with PPX at 340 K and 0.1-10 bar pressure.

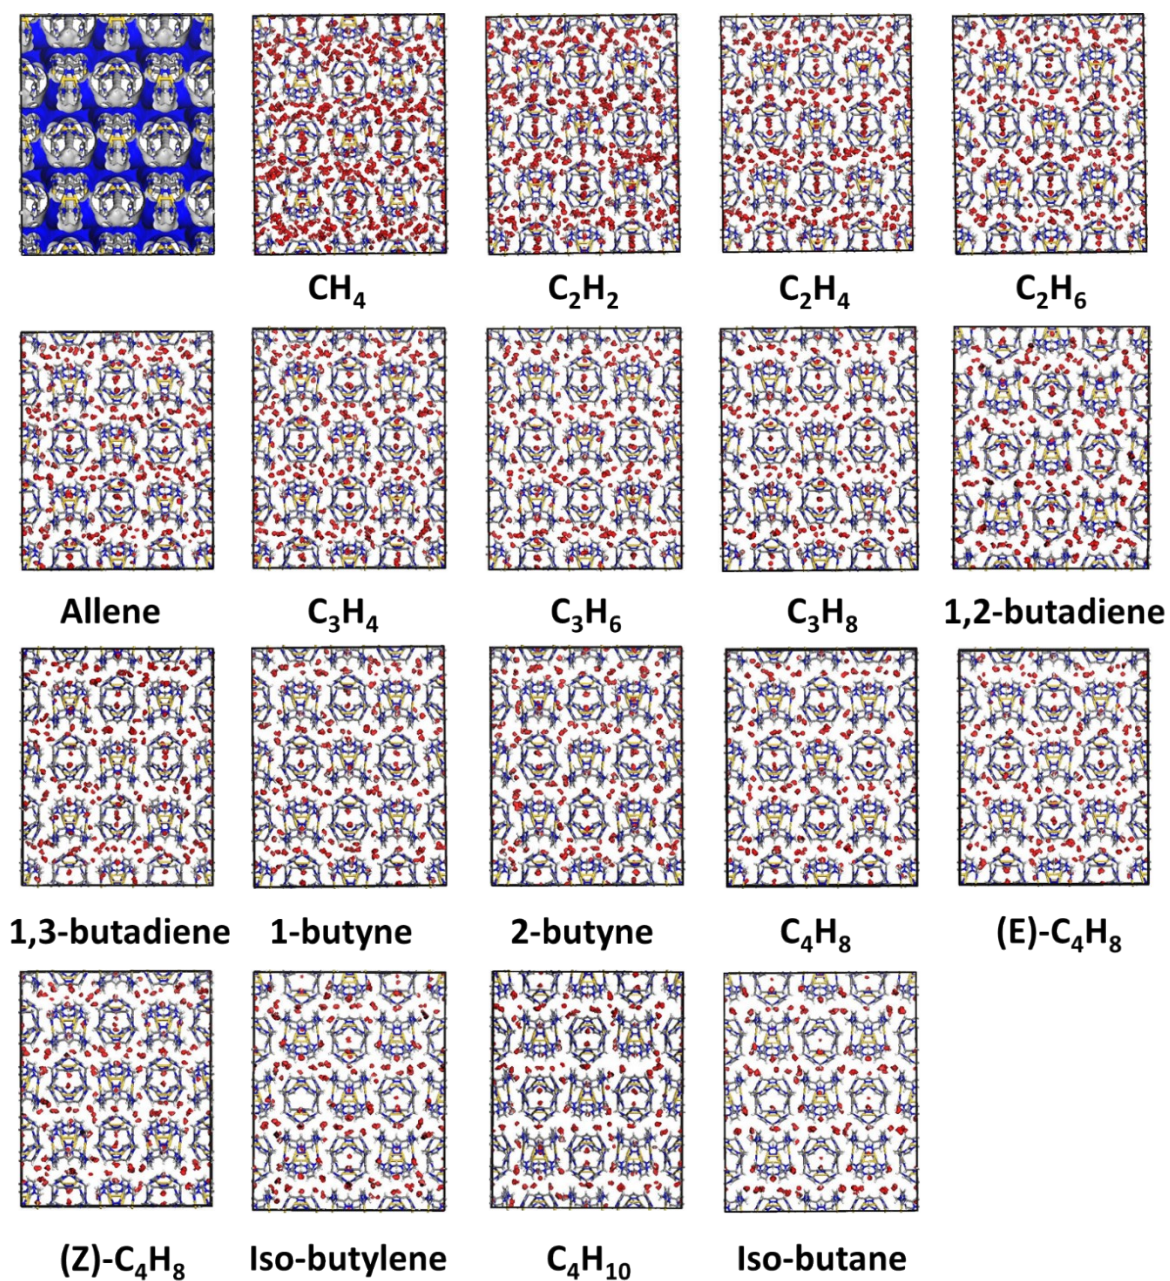

**Figure S7.** Pore surface of PPX and density distribution plot of HCs adsorbed PPX obtained from GCMC simulation at 298 K temperature and 1 bar pressure.

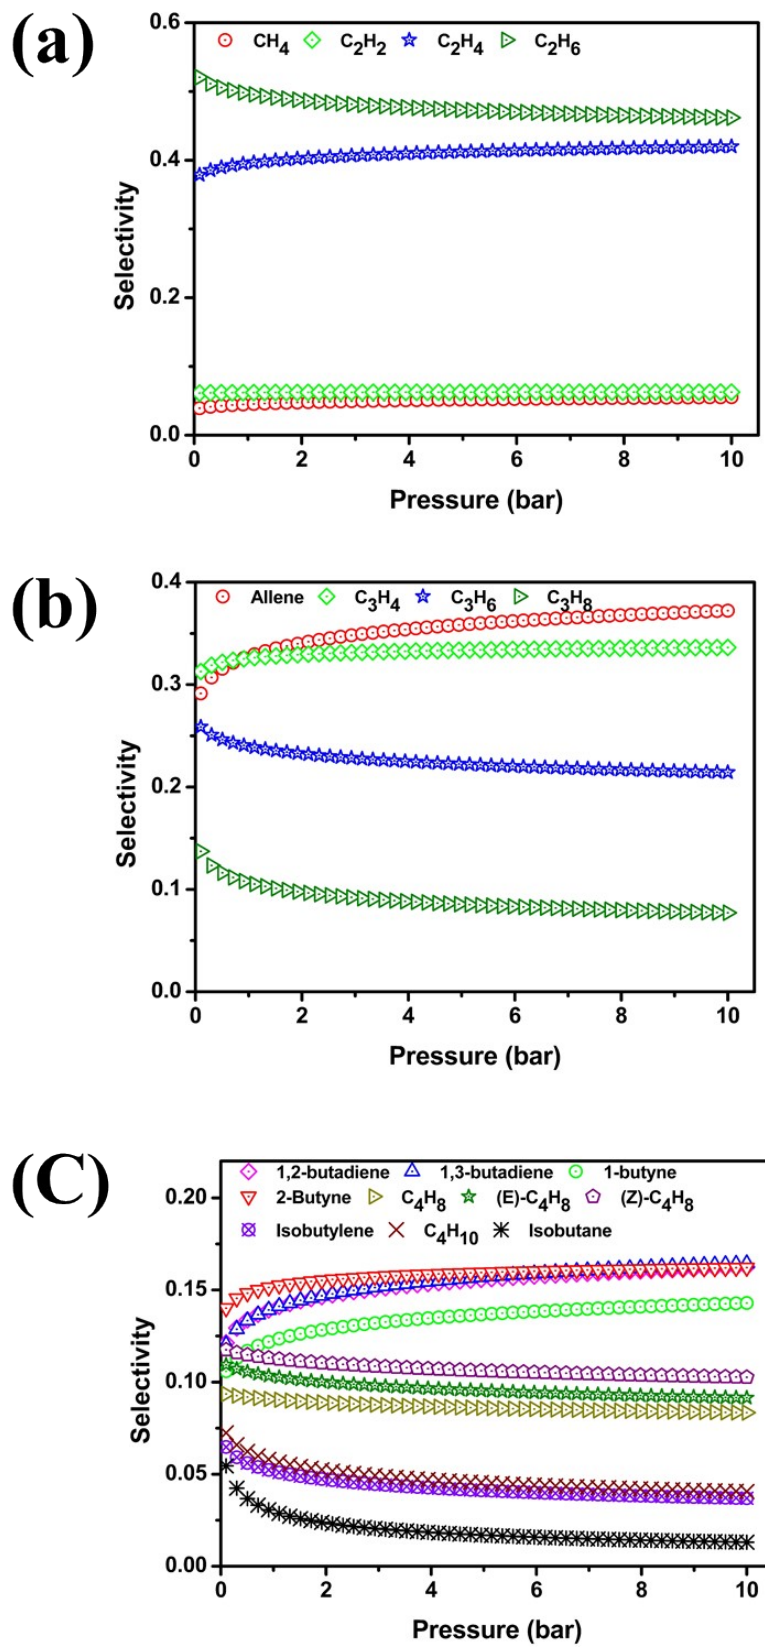

**Figure S8:** Ideal adsorption solution theory for separation of (a) C1/C2, (b) C3 and (c) C4 hydrocarbons from their isomers at 273 K.

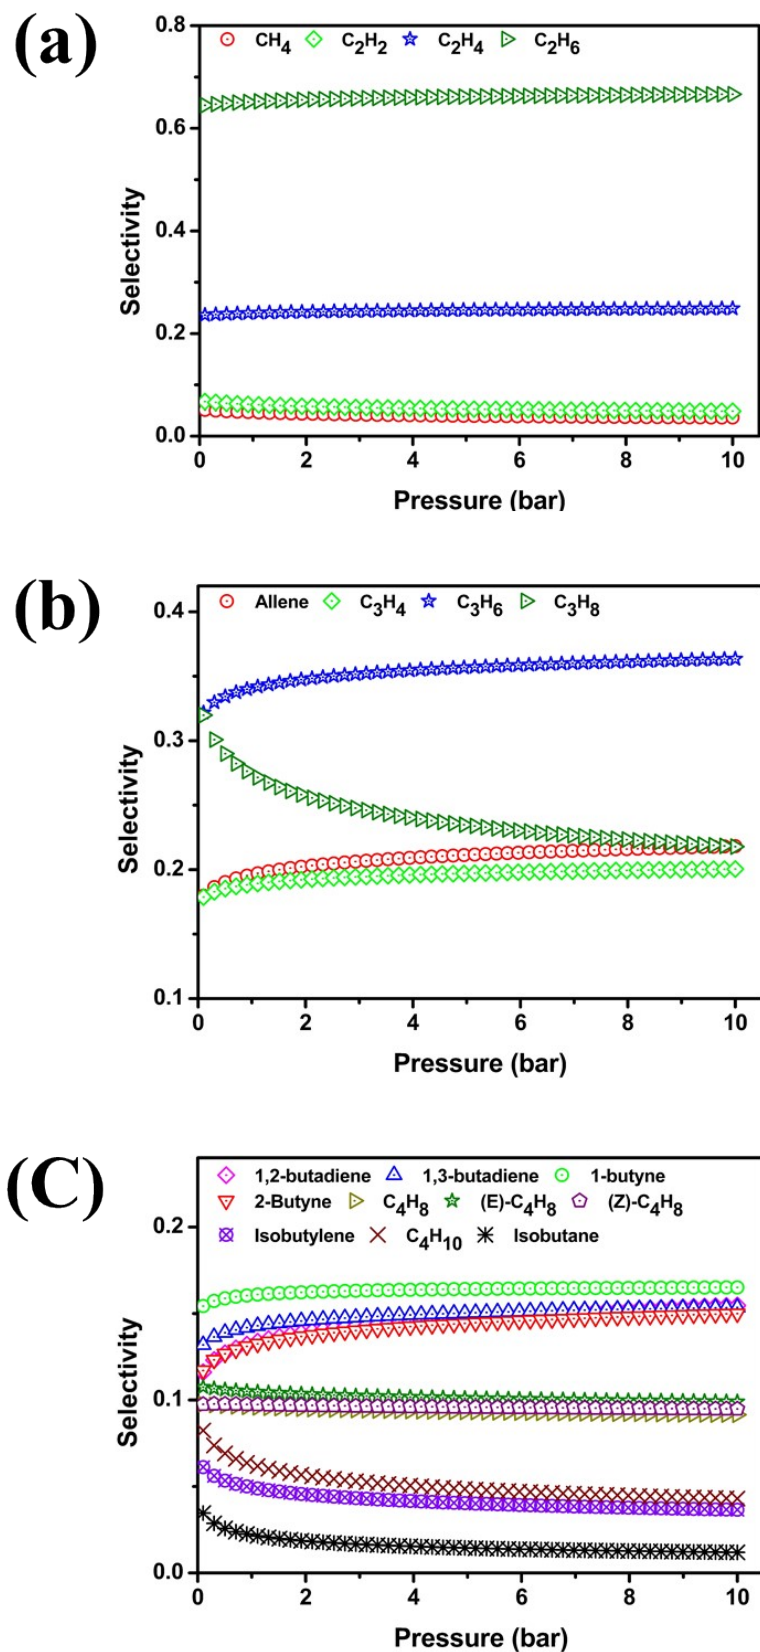

**Figure S9:** Ideal adsorption solution theory for separation of (a) C1/C2, (b) C3 and (c) C4 hydrocarbons from their isomers at 340 K.



## Coordinates

### CH<sub>4</sub>@PPX

|    |              |              |              |   |              |              |              |
|----|--------------|--------------|--------------|---|--------------|--------------|--------------|
| Au | -1.575720000 | -3.660620000 | -0.834348000 | C | -1.879679000 | -3.913235000 | -5.069875000 |
| Au | 1.567043000  | -3.653994000 | -0.829148000 | C | 0.003100000  | -4.897232000 | -3.650195000 |
| Au | 3.902769000  | -1.570521000 | 0.841814000  | C | 2.049810000  | -3.654754000 | -2.777649000 |
| Au | -3.920677000 | -1.568506000 | 0.829419000  | C | 3.101362000  | -3.313958000 | -4.792549000 |
| Au | -1.569544000 | 3.663056000  | -0.834298000 | C | 1.893466000  | -3.918600000 | -5.062663000 |
| Au | 1.573181000  | 3.651038000  | -0.829098000 | C | -4.335266000 | -2.594217000 | -2.665093000 |
| Au | 3.906010000  | 1.564709000  | 0.841873000  | C | -4.196729000 | -1.123711000 | -2.365408000 |
| Au | -3.918196000 | 1.574760000  | 0.829466000  | C | 4.341863000  | -2.601775000 | -2.649880000 |
| N  | -3.171025000 | -3.163801000 | -3.406899000 | C | 4.209562000  | -1.130288000 | -2.352879000 |
| N  | -1.247207000 | -4.123811000 | -3.826256000 | C | 3.788231000  | -2.030046000 | 2.792138000  |
| N  | 1.254029000  | -4.123711000 | -3.821631000 | C | 3.933505000  | -1.857661000 | 5.086225000  |
| N  | 3.177864000  | -3.166845000 | -3.395389000 | C | 3.277171000  | -3.033315000 | 4.795471000  |
| N  | -4.007228000 | -0.696498000 | -1.073987000 | C | 2.584615000  | -4.246674000 | 2.632613000  |
| N  | 4.017993000  | -0.702497000 | -1.062388000 | C | 1.116510000  | -4.055416000 | 2.345406000  |
| N  | 4.240101000  | -1.246957000 | 3.851958000  | C | -0.012673000 | -4.250923000 | 3.174227000  |
| N  | 3.200735000  | -3.119418000 | 3.393406000  | C | -1.139144000 | -4.052573000 | 2.342522000  |
| N  | 0.691447000  | -3.744164000 | 1.076310000  | C | -2.608573000 | -4.242004000 | 2.625832000  |
| N  | -0.709041000 | -3.742927000 | 1.074259000  | C | -3.815854000 | -2.026361000 | 2.780223000  |
| N  | -3.226917000 | -3.113787000 | 3.383953000  | C | -3.960049000 | -1.848001000 | 5.073789000  |
| N  | -4.267070000 | -1.240271000 | 3.838123000  | C | -3.303178000 | -3.024085000 | 4.785826000  |
| N  | -3.165599000 | 3.168804000  | -3.406898000 | C | -2.041341000 | 3.660041000  | -2.785111000 |
| N  | -1.240191000 | 4.125678000  | -3.826198000 | C | -3.081931000 | 3.311444000  | -4.804073000 |
| N  | 1.261076000  | 4.121900000  | -3.821507000 | C | -1.872989000 | 3.916178000  | -5.069828000 |
| N  | 3.183537000  | 3.162242000  | -3.395348000 | C | 0.011261000  | 4.897204000  | -3.650022000 |
| N  | -4.006049000 | 0.702951000  | -1.073978000 | C | 2.056115000  | 3.651550000  | -2.777573000 |
| N  | 4.019363000  | 0.696603000  | -1.062386000 | C | 3.107399000  | 3.309903000  | -4.792471000 |
| N  | 4.242252000  | 1.240138000  | 3.851998000  | C | 1.900363000  | 3.916283000  | -5.062528000 |
| N  | 3.206047000  | 3.114359000  | 3.393486000  | C | -4.330848000 | 2.601223000  | -2.665118000 |
| N  | 0.697706000  | 3.742669000  | 1.076383000  | C | -4.194839000 | 1.130495000  | -2.365400000 |
| N  | -0.702803000 | 3.743742000  | 1.074336000  | C | 4.346638000  | 2.595255000  | -2.649901000 |
| N  | -3.221764000 | 3.118856000  | 3.383979000  | C | 4.211747000  | 1.124008000  | -2.352887000 |
| N  | -4.265004000 | 1.247055000  | 3.838147000  | C | 3.792020000  | 2.024192000  | 2.792202000  |
| C  | -2.047585000 | -3.656917000 | -2.785137000 | C | 3.936240000  | 1.851085000  | 5.086289000  |
| C  | -3.087629000 | -3.306545000 | -4.804078000 | C | 3.281836000  | 3.027825000  | 4.795558000  |

|   |              |              |              |                                       |              |              |              |
|---|--------------|--------------|--------------|---------------------------------------|--------------|--------------|--------------|
| C | 2.591646000  | 4.242541000  | 2.632695000  | H                                     | -4.420625000 | 3.158188000  | -1.721422000 |
| C | 1.123263000  | 4.053430000  | 2.345466000  | H                                     | -5.227520000 | 2.790962000  | -3.272582000 |
| C | -0.005616000 | 4.250816000  | 3.174249000  | H                                     | 5.245498000  | 2.788054000  | -3.253102000 |
| C | -1.132398000 | 4.054182000  | 2.342571000  | H                                     | 4.431029000  | 3.150334000  | -1.704551000 |
| C | -2.601522000 | 4.246059000  | 2.625864000  | H                                     | 4.233184000  | 1.432825000  | 6.040194000  |
| C | -3.812556000 | 2.032432000  | 2.780254000  | H                                     | 2.908283000  | 3.803978000  | 5.451854000  |
| C | -3.956778000 | 1.854162000  | 5.073816000  | H                                     | 2.750751000  | 5.158325000  | 3.219960000  |
| C | -3.298009000 | 3.029185000  | 4.785851000  | H                                     | 3.140389000  | 4.332709000  | 1.684430000  |
| C | -4.317406000 | 0.003496000  | -3.210499000 | H                                     | -0.006754000 | 4.539382000  | 4.220358000  |
| C | 4.335005000  | -0.003263000 | -3.197849000 | H                                     | -3.147380000 | 4.338638000  | 1.676215000  |
| C | 5.032436000  | -0.004090000 | 3.712687000  | H                                     | -2.759891000 | 5.161680000  | 3.213561000  |
| C | -5.057033000 | 0.004053000  | 3.695893000  | H                                     | -4.255520000 | 1.435053000  | 6.026771000  |
| H | -3.885215000 | -3.007175000 | -5.472748000 | H                                     | -2.921867000 | 3.802438000  | 5.444080000  |
| H | -1.450971000 | -4.235717000 | -6.010805000 | H                                     | -4.505038000 | 0.003652000  | -4.279143000 |
| H | 0.004590000  | -5.705332000 | -4.394250000 | H                                     | 4.525019000  | -0.003457000 | -4.266051000 |
| H | 0.001249000  | -5.325134000 | -2.641996000 | H                                     | 5.504740000  | -0.004485000 | 2.724467000  |
| H | 3.903141000  | -3.018650000 | -5.458003000 | H                                     | 5.804333000  | -0.004786000 | 4.493993000  |
| H | 1.468893000  | -4.243247000 | -6.004724000 | H                                     | -5.525403000 | 0.004458000  | 2.705792000  |
| H | -4.425920000 | -3.151009000 | -1.721373000 | H                                     | -5.831696000 | 0.004686000  | 4.474470000  |
| H | -5.232297000 | -2.782454000 | -3.272496000 | H                                     | 2.902688000  | -3.809050000 | 5.451733000  |
| H | 5.240432000  | -2.796096000 | -3.253031000 | C                                     | 0.346860000  | -0.000648000 | -0.115216000 |
| H | 4.425306000  | -3.156972000 | -1.704524000 | H                                     | 0.045446000  | 0.905284000  | -0.670297000 |
| H | 4.231498000  | -1.440099000 | 6.040108000  | H                                     | -0.148540000 | 0.000106000  | 0.869509000  |
| H | 2.742393000  | -5.162700000 | 3.219856000  | H                                     | 0.046755000  | -0.908251000 | -0.668233000 |
| H | 3.133188000  | -4.337647000 | 1.684329000  | H                                     | 1.439724000  | 0.000375000  | 0.022650000  |
| H | -0.014263000 | -4.539270000 | 4.220392000  | <u>C<sub>2</sub>H<sub>2</sub>@PPX</u> |              |              |              |
| H | -3.154619000 | -4.333647000 | 1.676198000  | Au                                    | 4.288799000  | 0.665033000  | 0.844253000  |
| H | -2.768463000 | -5.157365000 | 3.213524000  | Au                                    | 3.460840000  | -2.374683000 | 0.835997000  |
| H | -4.258162000 | -1.428427000 | 6.026738000  | Au                                    | 0.661137000  | -3.819948000 | -0.827648000 |
| H | -2.928338000 | -3.797968000 | 5.444056000  | Au                                    | 2.423092000  | 3.175814000  | -0.825100000 |
| H | -3.880008000 | 3.013437000  | -5.472768000 | Au                                    | -3.461385000 | 2.374936000  | 0.835760000  |
| H | -1.443770000 | 4.238022000  | -6.010743000 | Au                                    | -4.289394000 | -0.664740000 | 0.844322000  |
| H | 0.013975000  | 5.705390000  | -4.393980000 | Au                                    | -2.422831000 | -3.175786000 | -0.824856000 |
| H | 0.010016000  | 5.325011000  | -2.641783000 | Au                                    | -0.660927000 | 3.819103000  | -0.827967000 |
| H | 3.908822000  | 3.013634000  | -5.457927000 | N                                     | 3.896009000  | 2.313408000  | 3.397202000  |
| H | 1.476327000  | 4.241782000  | -6.004535000 | N                                     | 4.470226000  | 0.250214000  | 3.855425000  |

|   |              |              |              |   |              |              |              |
|---|--------------|--------------|--------------|---|--------------|--------------|--------------|
| N | 3.861177000  | -2.157528000 | 3.847492000  | C | 3.602152000  | -3.464701000 | -2.657493000 |
| N | 2.391385000  | -3.712392000 | 3.378453000  | C | 3.848318000  | -2.008726000 | -2.357582000 |
| N | 1.584271000  | 3.444048000  | 1.081105000  | C | 4.241660000  | -0.946248000 | -3.204158000 |
| N | -0.215461000 | -3.738269000 | 1.077695000  | C | 4.426654000  | 0.169681000  | -2.357207000 |
| N | 0.242179000  | -4.223971000 | -3.816755000 | C | 4.906000000  | 1.565522000  | -2.660761000 |
| N | 2.333502000  | -3.722149000 | -3.399622000 | C | 2.893140000  | 3.083678000  | -2.775489000 |
| N | 3.796501000  | -1.554853000 | -1.063552000 | C | 2.790211000  | 3.385615000  | -5.058689000 |
| N | 4.156532000  | -0.200917000 | -1.062217000 | C | 3.849174000  | 2.545161000  | -4.795249000 |
| N | 3.896214000  | 2.378871000  | -3.399051000 | C | -3.231645000 | 2.800062000  | 2.783095000  |
| N | 2.208081000  | 3.710085000  | -3.814905000 | C | -2.482717000 | 3.653512000  | 4.780531000  |
| N | -2.391284000 | 3.712657000  | 3.378003000  | C | -3.408623000 | 2.678141000  | 5.078100000  |
| N | -3.861311000 | 2.158092000  | 3.847286000  | C | -4.936450000 | 1.148317000  | 3.717900000  |
| N | -4.469867000 | -0.249736000 | 3.855499000  | C | -4.244317000 | -1.125766000 | 2.796851000  |
| N | -3.895420000 | -2.312902000 | 3.397352000  | C | -3.902985000 | -2.197636000 | 4.799190000  |
| N | 0.215760000  | 3.737992000  | 1.077403000  | C | -4.267588000 | -0.901352000 | 5.089827000  |
| N | -1.583912000 | -3.444031000 | 1.081360000  | C | -1.528792000 | 4.662770000  | 2.613443000  |
| N | -2.207815000 | -3.710549000 | -3.814640000 | C | -0.136900000 | 4.150343000  | 2.339630000  |
| N | -3.895883000 | -2.379235000 | -3.398935000 | C | -3.542207000 | -3.550671000 | 2.639270000  |
| N | -4.157003000 | 0.200854000  | -1.062322000 | C | -2.067532000 | -3.675652000 | 2.347170000  |
| N | -3.797187000 | 1.554866000  | -1.063704000 | C | -2.892838000 | -3.083983000 | -2.775286000 |
| N | -2.333327000 | 3.721709000  | -3.399945000 | C | -2.790131000 | -3.386447000 | -5.058442000 |
| N | -0.241972000 | 4.223394000  | -3.817083000 | C | -3.849028000 | -2.545884000 | -4.795097000 |
| C | 4.244632000  | 1.126202000  | 2.796739000  | C | -4.905702000 | -1.565866000 | -2.660739000 |
| C | 3.903949000  | 2.198329000  | 4.799054000  | C | -4.426436000 | -0.169955000 | -2.357401000 |
| C | 4.268560000  | 0.902061000  | 5.089740000  | C | -4.240863000 | 0.945760000  | -3.204491000 |
| C | 4.936479000  | -1.147951000 | 3.717857000  | C | -3.848232000 | 2.008461000  | -2.357880000 |
| C | 3.231463000  | -2.799623000 | 2.783407000  | C | -3.601981000 | 3.464404000  | -2.657812000 |
| C | 2.482868000  | -3.653070000 | 4.780972000  | C | -1.125915000 | 3.938864000  | -2.777180000 |
| C | 3.408722000  | -2.677602000 | 5.078387000  | C | -0.907583000 | 4.172710000  | -5.060731000 |
| C | 3.542579000  | 3.551022000  | 2.638961000  | C | -2.221191000 | 3.854307000  | -4.796500000 |
| C | 2.067869000  | 3.675767000  | 2.346915000  | C | 1.006969000  | 4.116668000  | 3.171116000  |
| C | 1.529063000  | -4.662787000 | 2.614004000  | C | -1.006684000 | -4.116596000 | 3.171441000  |
| C | 0.137161000  | -4.150517000 | 2.339963000  | C | -1.141026000 | -4.721080000 | -3.636588000 |
| C | 1.126126000  | -3.939540000 | -2.776848000 | C | 1.141225000  | 4.720560000  | -3.636950000 |
| C | 0.907687000  | -4.172870000 | -5.060430000 | H | 3.691417000  | 3.032162000  | 5.456431000  |
| C | 2.221263000  | -3.854317000 | -4.796210000 | H | 4.432242000  | 0.418576000  | 6.044877000  |

|   |              |              |              |                                       |              |              |              |
|---|--------------|--------------|--------------|---------------------------------------|--------------|--------------|--------------|
| H | 5.678115000  | -1.339290000 | 4.505117000  | H                                     | -1.067730000 | -4.413459000 | 4.213427000  |
| H | 5.402518000  | -1.262568000 | 2.733307000  | H                                     | -1.226541000 | -5.133514000 | -2.625566000 |
| H | 1.926354000  | -4.314682000 | 5.433009000  | H                                     | -1.308370000 | -5.517154000 | -4.374792000 |
| H | 3.798481000  | -2.351314000 | 6.034772000  | H                                     | 1.226705000  | 5.133112000  | -2.625975000 |
| H | 4.103631000  | 3.528037000  | 1.693771000  | H                                     | 1.308500000  | 5.516588000  | -4.375217000 |
| H | 3.888795000  | 4.409028000  | 3.232823000  | H                                     | 3.066860000  | -3.751155000 | -5.464933000 |
| H | 1.482103000  | -5.596397000 | 3.193042000  | C                                     | 0.613097000  | 0.053981000  | -0.411331000 |
| H | 2.037328000  | -4.866790000 | 1.660762000  | C                                     | -0.613616000 | -0.049644000 | -0.411116000 |
| H | 0.418655000  | -4.397997000 | -6.000229000 | H                                     | 1.682309000  | 0.143510000  | -0.403698000 |
| H | 4.422582000  | -3.876841000 | -3.262762000 | H                                     | -1.682848000 | -0.139570000 | -0.404217000 |
| H | 3.546447000  | -4.025431000 | -1.713424000 | <u>C<sub>2</sub>H<sub>4</sub>@PPX</u> |              |              |              |
| H | 4.402899000  | -0.988229000 | -4.276128000 | Au                                    | -3.963433000 | -1.592971000 | 0.832984000  |
| H | 5.127013000  | 2.088313000  | -1.719107000 | Au                                    | -3.894689000 | 1.557725000  | 0.843091000  |
| H | 5.818844000  | 1.540302000  | -3.273042000 | Au                                    | -1.577809000 | 3.703345000  | -0.821981000 |
| H | 2.439871000  | 3.795703000  | -5.997917000 | Au                                    | -1.583449000 | -3.642418000 | -0.836816000 |
| H | 4.572469000  | 2.095416000  | -5.464172000 | Au                                    | 3.960021000  | -1.599937000 | 0.832823000  |
| H | -1.926056000 | 4.315114000  | 5.432454000  | Au                                    | 3.898872000  | 1.550859000  | 0.842768000  |
| H | -3.798384000 | 2.352004000  | 6.034534000  | Au                                    | 1.584398000  | 3.699098000  | -0.822273000 |
| H | -5.677984000 | 1.339568000  | 4.505275000  | Au                                    | 1.576168000  | -3.645333000 | -0.836895000 |
| H | -5.402703000 | 1.262754000  | 2.733429000  | N                                     | -3.214869000 | -3.131693000 | 3.378765000  |
| H | -3.690230000 | -3.031380000 | 5.456610000  | N                                     | -4.245633000 | -1.256023000 | 3.845052000  |
| H | -4.431063000 | -0.417768000 | 6.044947000  | N                                     | -4.232971000 | 1.231737000  | 3.852508000  |
| H | -2.036929000 | 4.866610000  | 1.660095000  | N                                     | -3.198382000 | 3.108347000  | 3.398993000  |
| H | -1.481788000 | 5.596519000  | 3.192261000  | N                                     | -0.704515000 | -3.738312000 | 1.068131000  |
| H | -3.888416000 | -4.408569000 | 3.233295000  | N                                     | -0.696258000 | 3.802679000  | 1.077629000  |
| H | -4.103317000 | -3.527849000 | 1.694108000  | N                                     | -1.246291000 | 4.114560000  | -3.820079000 |
| H | -2.439858000 | -3.796735000 | -5.997607000 | N                                     | -3.169699000 | 3.158714000  | -3.389005000 |
| H | -4.572326000 | -2.096199000 | -5.464059000 | N                                     | -4.039130000 | 0.690971000  | -1.058756000 |
| H | -5.818589000 | -1.540909000 | -3.272973000 | N                                     | -4.055078000 | -0.707971000 | -1.064614000 |
| H | -5.126592000 | -2.088514000 | -1.718971000 | N                                     | -3.188923000 | -3.151323000 | -3.407510000 |
| H | -4.401617000 | 0.987550000  | -4.276542000 | N                                     | -1.255928000 | -4.091541000 | -3.829080000 |
| H | -3.546191000 | 4.025117000  | -1.713735000 | N                                     | 3.208740000  | -3.137116000 | 3.378721000  |
| H | -4.422358000 | 3.876676000  | -3.263070000 | N                                     | 4.243383000  | -1.263545000 | 3.844895000  |
| H | -0.418550000 | 4.397962000  | -6.000497000 | N                                     | 4.235981000  | 1.224220000  | 3.852220000  |
| H | -3.066844000 | 3.751353000  | -5.465183000 | N                                     | 3.204926000  | 3.102715000  | 3.398495000  |
| H | 1.067980000  | 4.413716000  | 4.213051000  | N                                     | 0.697198000  | -3.739473000 | 1.068111000  |

|   |              |              |              |   |              |              |              |
|---|--------------|--------------|--------------|---|--------------|--------------|--------------|
| N | 0.703403000  | 3.801151000  | 1.077484000  | C | 2.593288000  | -4.263453000 | 2.615649000  |
| N | 1.254000000  | 4.112127000  | -3.820220000 | C | 1.123885000  | -4.071589000 | 2.331834000  |
| N | 3.175701000  | 3.152747000  | -3.389386000 | C | 2.601548000  | 4.240365000  | 2.643041000  |
| N | 4.041038000  | 0.683625000  | -1.059053000 | C | 1.131465000  | 4.068331000  | 2.355029000  |
| N | 4.053853000  | -0.715340000 | -1.064802000 | C | 2.055887000  | 3.660805000  | -2.773052000 |
| N | 3.182094000  | -3.157064000 | -3.407725000 | C | 1.882781000  | 3.878390000  | -5.061548000 |
| N | 1.247346000  | -4.093713000 | -3.829192000 | C | 3.089217000  | 3.272156000  | -4.788501000 |
| C | -3.820519000 | -2.049557000 | 2.782093000  | C | 4.340090000  | 2.590988000  | -2.642544000 |
| C | -3.257129000 | -3.031953000 | 4.781370000  | C | 4.215127000  | 1.117616000  | -2.350450000 |
| C | -3.908205000 | -1.854610000 | 5.076974000  | C | 4.335739000  | -0.005130000 | -3.201472000 |
| C | -5.031071000 | -0.007976000 | 3.712732000  | C | 4.229832000  | -1.136100000 | -2.359253000 |
| C | -3.777628000 | 2.016343000  | 2.794461000  | C | 4.354997000  | -2.606048000 | -2.666218000 |
| C | -3.281648000 | 3.021992000  | 4.800632000  | C | 2.052435000  | -3.637156000 | -2.786822000 |
| C | -3.934857000 | 1.844040000  | 5.088190000  | C | 1.882350000  | -3.887525000 | -5.072311000 |
| C | -2.601432000 | -4.259120000 | 2.615693000  | C | 3.096973000  | -3.295380000 | -4.805335000 |
| C | -1.131715000 | -4.069747000 | 2.331850000  | C | -0.004079000 | -4.281554000 | 3.158622000  |
| C | -2.593209000 | 4.245159000  | 2.643666000  | C | 0.004250000  | 4.240401000  | 3.191596000  |
| C | -1.123502000 | 4.070622000  | 2.355294000  | C | 0.004603000  | 4.890044000  | -3.656101000 |
| C | -2.049174000 | 3.665361000  | -2.772788000 | C | -0.004946000 | -4.864495000 | -3.655794000 |
| C | -1.875194000 | 3.881027000  | -5.061387000 | H | -2.865630000 | -3.800943000 | 5.435598000  |
| C | -3.082706000 | 3.277010000  | -4.788185000 | H | -4.183313000 | -1.428609000 | 6.033956000  |
| C | -4.334998000 | 2.599150000  | -2.641956000 | H | -5.799294000 | -0.005349000 | 4.497698000  |
| C | -4.212863000 | 1.125483000  | -2.350028000 | H | -5.508310000 | -0.002955000 | 2.726933000  |
| C | -4.336276000 | 0.003080000  | -3.201109000 | H | -2.913732000 | 3.799460000  | 5.458551000  |
| C | -4.232484000 | -1.128210000 | -2.359058000 | H | -4.236894000 | 1.426009000  | 6.040582000  |
| C | -4.360761000 | -2.597860000 | -2.666113000 | H | -3.149321000 | -4.346010000 | 1.666658000  |
| C | -2.060076000 | -3.633406000 | -2.786666000 | H | -2.761450000 | -5.176537000 | 3.200122000  |
| C | -1.890726000 | -3.884442000 | -5.072142000 | H | -2.761609000 | 5.156401000  | 3.235552000  |
| C | -3.104210000 | -3.289991000 | -4.805112000 | H | -3.142678000 | 4.335362000  | 1.695855000  |
| C | 3.816419000  | -2.056153000 | 2.781970000  | H | -1.444913000 | 4.188203000  | -6.006697000 |
| C | 3.251466000  | -3.037522000 | 4.781322000  | H | -5.234125000 | 2.801020000  | -3.242016000 |
| C | 3.904980000  | -1.861516000 | 5.076855000  | H | -4.412537000 | 3.152241000  | -1.694941000 |
| C | 5.031482000  | -0.017154000 | 3.712542000  | H | -4.512737000 | 0.008479000  | -4.271577000 |
| C | 3.782417000  | 2.009730000  | 2.794100000  | H | -4.448289000 | -3.160226000 | -1.725334000 |
| C | 3.287719000  | 3.016199000  | 4.800151000  | H | -5.254409000 | -2.791278000 | -3.276868000 |
| C | 3.938583000  | 1.836982000  | 5.087851000  | H | -1.459130000 | -4.201086000 | -6.013715000 |

|                                       |              |              |              |    |              |              |              |
|---------------------------------------|--------------|--------------|--------------|----|--------------|--------------|--------------|
| H                                     | -3.904952000 | -2.997098000 | -5.472877000 | Au | -1.764712000 | 3.643052000  | -0.825025000 |
| H                                     | 2.858549000  | -3.805755000 | 5.435588000  | Au | -1.414701000 | -3.743695000 | -0.826331000 |
| H                                     | 4.181127000  | -1.436107000 | 6.033802000  | Au | 4.021653000  | -1.408123000 | 0.831110000  |
| H                                     | 5.799673000  | -0.016137000 | 4.497543000  | Au | 3.837365000  | 1.730445000  | 0.832870000  |
| H                                     | 5.508764000  | -0.013189000 | 2.726753000  | Au | 1.388674000  | 3.714716000  | -0.833261000 |
| H                                     | 2.921077000  | 3.794329000  | 5.457992000  | Au | 1.736166000  | -3.576902000 | -0.832576000 |
| H                                     | 4.239570000  | 1.418349000  | 6.040311000  | N  | -3.062138000 | -3.264133000 | 3.392100000  |
| H                                     | 3.141070000  | -4.351257000 | 1.666632000  | N  | -4.179176000 | -1.436005000 | 3.847720000  |
| H                                     | 2.751748000  | -5.181152000 | 3.200066000  | N  | -4.289633000 | 1.050216000  | 3.850199000  |
| H                                     | 2.771607000  | 5.151470000  | 3.234661000  | N  | -3.349228000 | 2.976029000  | 3.398850000  |
| H                                     | 3.150926000  | 4.329439000  | 1.695078000  | N  | -0.530621000 | -3.783086000 | 1.076743000  |
| H                                     | 1.453210000  | 4.186931000  | -6.006740000 | N  | -0.885748000 | 3.750482000  | 1.076621000  |
| H                                     | 3.884383000  | 2.959212000  | -5.453810000 | N  | -1.448489000 | 4.065988000  | -3.821738000 |
| H                                     | 5.239452000  | 2.791082000  | -3.242845000 | N  | -3.326224000 | 3.022476000  | -3.392292000 |
| H                                     | 4.418967000  | 3.143938000  | -1.695568000 | N  | -4.050682000 | 0.517378000  | -1.061195000 |
| H                                     | 4.511777000  | -0.000216000 | -4.272010000 | N  | -3.987750000 | -0.879223000 | -1.062506000 |
| H                                     | 4.441131000  | -3.168616000 | -1.725421000 | N  | -3.032006000 | -3.303247000 | -3.396278000 |
| H                                     | 5.248327000  | -2.801407000 | -3.276819000 | N  | -1.067274000 | -4.174877000 | -3.819797000 |
| H                                     | 1.450066000  | -4.203226000 | -6.013882000 | N  | 3.354456000  | -2.973272000 | 3.382458000  |
| H                                     | 3.898178000  | -3.003879000 | -5.473151000 | N  | 4.305651000  | -1.054767000 | 3.842165000  |
| H                                     | -0.004326000 | -4.586402000 | 4.200086000  | N  | 4.187963000  | 1.428839000  | 3.842711000  |
| H                                     | 0.004623000  | 4.495142000  | 4.246369000  | N  | 3.060399000  | 3.249391000  | 3.382972000  |
| H                                     | 0.005068000  | 5.331508000  | -2.653824000 | N  | 0.868670000  | -3.716048000 | 1.073609000  |
| H                                     | 0.005365000  | 5.688247000  | -4.410791000 | N  | 0.513806000  | 3.797870000  | 1.072094000  |
| H                                     | -0.005262000 | -5.293586000 | -2.648188000 | N  | 1.049671000  | 4.165794000  | -3.826757000 |
| H                                     | -0.005690000 | -5.672359000 | -4.400182000 | N  | 3.011629000  | 3.288604000  | -3.402420000 |
| H                                     | -3.878253000 | 2.964957000  | -5.453455000 | N  | 4.010205000  | 0.865835000  | -1.067270000 |
| C                                     | 0.677523000  | -0.034542000 | -0.205558000 | N  | 4.083701000  | -0.530339000 | -1.070015000 |
| C                                     | -0.676613000 | -0.031348000 | -0.208964000 | N  | 3.315094000  | -3.023570000 | -3.406947000 |
| H                                     | 1.242576000  | -0.851809000 | 0.251142000  | N  | 1.431380000  | -4.061525000 | -3.823008000 |
| H                                     | -1.247800000 | -0.845944000 | 0.244862000  | C  | -3.698967000 | -2.203686000 | 2.788805000  |
| H                                     | 1.264532000  | 0.772239000  | -0.654590000 | C  | -3.137232000 | -3.175803000 | 4.794156000  |
| H                                     | -1.257520000 | 0.778231000  | -0.660900000 | C  | -3.842497000 | -2.028409000 | 5.083060000  |
| <u>C<sub>2</sub>H<sub>6</sub>@PPX</u> |              |              |              | C  | -5.023454000 | -0.227952000 | 3.706713000  |
| Au                                    | -3.833376000 | -1.747142000 | 0.838449000  | C  | -3.870466000 | 1.855559000  | 2.793013000  |
| Au                                    | -3.954784000 | 1.388857000  | 0.842248000  | C  | -3.433659000 | 2.886811000  | 4.800381000  |

|   |              |              |              |   |              |              |              |
|---|--------------|--------------|--------------|---|--------------|--------------|--------------|
| C | -4.027524000 | 1.677398000  | 5.086442000  | C | 2.058912000  | -3.836604000 | -5.066707000 |
| C | -2.399003000 | -4.366140000 | 2.633937000  | C | 3.241220000  | -3.180845000 | -4.803023000 |
| C | -0.940138000 | -4.112473000 | 2.346154000  | C | 0.197499000  | -4.256639000 | 3.174023000  |
| C | -2.794248000 | 4.138444000  | 2.643644000  | C | -0.196058000 | 4.247370000  | 3.181157000  |
| C | -1.319186000 | 4.022349000  | 2.351652000  | C | -0.230300000 | 4.891021000  | -3.655826000 |
| C | -2.234151000 | 3.586909000  | -2.775134000 | C | 0.216838000  | -4.890790000 | -3.646687000 |
| C | -2.059993000 | 3.795324000  | -5.064102000 | H | -2.727674000 | -3.932402000 | 5.451815000  |
| C | -3.238491000 | 3.135930000  | -4.791823000 | H | -4.154910000 | -1.620541000 | 6.036534000  |
| C | -4.461604000 | 2.401368000  | -2.647229000 | H | -5.797370000 | -0.262479000 | 4.485314000  |
| C | -4.257571000 | 0.937460000  | -2.351765000 | H | -5.492251000 | -0.248002000 | 2.717042000  |
| C | -4.326408000 | -0.193189000 | -3.198768000 | H | -3.107987000 | 3.682274000  | 5.459096000  |
| C | -4.154637000 | -1.314396000 | -2.353992000 | H | -4.311529000 | 1.245213000  | 6.038063000  |
| C | -4.221370000 | -2.790348000 | -2.652651000 | H | -2.944134000 | -4.482218000 | 1.686326000  |
| C | -1.889879000 | -3.754085000 | -2.776386000 | H | -2.517654000 | -5.286747000 | 3.223251000  |
| C | -1.705379000 | -3.979838000 | -5.063012000 | H | -2.998036000 | 5.041466000  | 3.236850000  |
| C | -2.939147000 | -3.428873000 | -4.794570000 | H | -3.349243000 | 4.206463000  | 1.697058000  |
| C | 3.907019000  | -1.865310000 | 2.781642000  | H | -1.640553000 | 4.116533000  | -6.009609000 |
| C | 3.402943000  | -2.872546000 | 4.784865000  | H | -5.368665000 | 2.552064000  | -3.250326000 |
| C | 4.003775000  | -1.667866000 | 5.076320000  | H | -4.572073000 | 2.950482000  | -1.701196000 |
| C | 5.038526000  | 0.224301000  | 3.705810000  | H | -4.514192000 | -0.200911000 | -4.267353000 |
| C | 3.698669000  | 2.188568000  | 2.782002000  | H | -4.281734000 | -3.350395000 | -1.708319000 |
| C | 3.142539000  | 3.168873000  | 4.785100000  | H | -5.109321000 | -3.023347000 | -3.257867000 |
| C | 3.854188000  | 2.026200000  | 5.076582000  | H | -1.261315000 | -4.274615000 | -6.005866000 |
| C | 2.790374000  | -4.128175000 | 2.623116000  | H | -3.747625000 | -3.158323000 | -5.462428000 |
| C | 1.313155000  | -4.007001000 | 2.341411000  | H | 3.050894000  | -3.658407000 | 5.441461000  |
| C | 2.397021000  | 4.349048000  | 2.622367000  | H | 4.267779000  | -1.230690000 | 6.031389000  |
| C | 0.934921000  | 4.104422000  | 2.343674000  | H | 5.806249000  | 0.261154000  | 4.490380000  |
| C | 1.864212000  | 3.727364000  | -2.783546000 | H | 5.514351000  | 0.246898000  | 2.719513000  |
| C | 1.697425000  | 3.990120000  | -5.068131000 | H | 2.732948000  | 3.927206000  | 5.440711000  |
| C | 2.929424000  | 3.435834000  | -4.799231000 | H | 4.173227000  | 1.624786000  | 6.030609000  |
| C | 4.201327000  | 2.780174000  | -2.657487000 | H | 3.339328000  | -4.192746000 | 1.672899000  |
| C | 4.143508000  | 1.303801000  | -2.361631000 | H | 2.993069000  | -5.036270000 | 3.208955000  |
| C | 4.300086000  | 0.185204000  | -3.212542000 | H | 2.523961000  | 5.272589000  | 3.205484000  |
| C | 4.258785000  | -0.946767000 | -2.365892000 | H | 2.936574000  | 4.457448000  | 1.670725000  |
| C | 4.458213000  | -2.408912000 | -2.668779000 | H | 1.260295000  | 4.299936000  | -6.009438000 |
| C | 2.209617000  | -3.553954000 | -2.783394000 | H | 3.743242000  | 3.176423000  | -5.465034000 |

|               |              |              |              |   |              |              |              |
|---------------|--------------|--------------|--------------|---|--------------|--------------|--------------|
| H             | 5.089199000  | 3.019407000  | -3.260587000 | N | -0.085967000 | 3.622041000  | 1.084080000  |
| H             | 4.257990000  | 3.338620000  | -1.711960000 | N | -0.632896000 | 4.042872000  | -3.789735000 |
| H             | 4.460879000  | 0.195256000  | -4.285441000 | N | -2.706103000 | 3.463087000  | -3.369553000 |
| H             | 4.575959000  | -2.962084000 | -1.725911000 | N | -4.246921000 | 1.279887000  | -1.032522000 |
| H             | 5.359512000  | -2.559983000 | -3.280340000 | N | -4.494900000 | -0.098003000 | -1.041448000 |
| H             | 1.646110000  | -4.184113000 | -6.005854000 | N | -3.731975000 | -2.609879000 | -3.403554000 |
| H             | 4.028613000  | -2.855978000 | -5.471877000 | N | -1.881431000 | -3.716400000 | -3.800888000 |
| H             | 0.213239000  | -4.545157000 | 4.219996000  | N | 2.682985000  | -3.423053000 | 3.365182000  |
| H             | -0.202524000 | 4.519194000  | 4.231661000  | N | 4.073486000  | -1.803183000 | 3.857956000  |
| H             | -0.245929000 | 5.326196000  | -2.650885000 | N | 4.524440000  | 0.629466000  | 3.857007000  |
| H             | -0.262876000 | 5.692865000  | -4.405911000 | N | 3.749967000  | 2.616232000  | 3.360277000  |
| H             | 0.236980000  | -5.317469000 | -2.638212000 | N | 0.084317000  | -3.615096000 | 1.079538000  |
| H             | 0.253484000  | -5.698754000 | -4.390006000 | N | 1.305994000  | 3.455626000  | 1.075123000  |
| H             | -4.015385000 | 2.782181000  | -5.458243000 | N | 1.865799000  | 3.722996000  | -3.807426000 |
| C             | -0.769508000 | -0.071217000 | -0.212815000 | N | 3.712914000  | 2.610235000  | -3.412917000 |
| C             | 0.752251000  | 0.180274000  | -0.070605000 | N | 4.496232000  | 0.091098000  | -1.050784000 |
| H             | -1.297474000 | 0.836401000  | -0.545985000 | N | 4.257762000  | -1.290053000 | -1.044292000 |
| H             | 0.955084000  | 0.964596000  | 0.679269000  | N | 2.695637000  | -3.464488000 | -3.382154000 |
| H             | -1.216004000 | -0.379876000 | 0.748768000  | N | 0.618478000  | -4.036870000 | -3.792287000 |
| H             | 1.204281000  | 0.516480000  | -1.019946000 | C | -4.255310000 | -1.478016000 | 2.794070000  |
| H             | -0.983833000 | -0.868239000 | -0.945426000 | C | -3.682545000 | -2.498607000 | 4.772197000  |
| H             | 1.275614000  | -0.739277000 | 0.241727000  | C | -4.169676000 | -1.249776000 | 5.086887000  |
| <u>Allene</u> |              |              |              | C | -5.081314000 | 0.733976000  | 3.766353000  |
| Au            | -4.473717000 | -1.014892000 | 0.850585000  | C | -3.510905000 | 2.500360000  | 2.792665000  |
| Au            | -3.839073000 | 2.106476000  | 0.850345000  | C | -2.700228000 | 3.327824000  | 4.778447000  |
| Au            | -1.017614000 | 3.631017000  | -0.800130000 | C | -3.573061000 | 2.309752000  | 5.090475000  |
| Au            | -2.198064000 | -3.247688000 | -0.817472000 | C | -3.265009000 | -3.802732000 | 2.600045000  |
| Au            | 3.873493000  | -2.126628000 | 0.841781000  | C | -1.779576000 | -3.779950000 | 2.326261000  |
| Au            | 4.473769000  | 1.010575000  | 0.838136000  | C | -1.889131000 | 4.440957000  | 2.610629000  |
| Au            | 2.180928000  | 3.235107000  | -0.824243000 | C | -0.457760000 | 4.045450000  | 2.337989000  |
| Au            | 1.015448000  | -3.609747000 | -0.806069000 | C | -1.506771000 | 3.727929000  | -2.747354000 |
| N             | -3.740596000 | -2.616581000 | 3.371835000  | C | -1.297862000 | 3.962537000  | -5.032412000 |
| N             | -4.511075000 | -0.628154000 | 3.868128000  | C | -2.598102000 | 3.594990000  | -4.766839000 |
| N             | -4.063357000 | 1.805521000  | 3.867908000  | C | -3.972836000 | 3.173063000  | -2.633036000 |
| N             | -2.676434000 | 3.428165000  | 3.375462000  | C | -4.176639000 | 1.709970000  | -2.334661000 |
| N             | -1.308477000 | -3.453348000 | 1.076187000  | C | -4.380413000 | 0.608122000  | -3.196112000 |



|   |              |              |              |   |              |              |              |
|---|--------------|--------------|--------------|---|--------------|--------------|--------------|
| C | -4.570018000 | -0.507727000 | -2.348706000 | H | -3.906123000 | 1.944712000  | 6.054162000  |
| C | -4.857663000 | -1.950059000 | -2.677733000 | H | -3.817298000 | -3.816327000 | 1.649669000  |
| C | -2.662091000 | -3.195377000 | -2.768275000 | H | -3.532661000 | -4.700492000 | 3.175652000  |
| C | -2.475391000 | -3.445253000 | -5.052671000 | H | -1.917332000 | 5.377027000  | 3.187219000  |
| C | -3.634819000 | -2.745566000 | -4.801031000 | H | -2.412233000 | 4.602835000  | 1.657377000  |
| C | 3.530965000  | -2.506857000 | 2.783794000  | H | -0.818999000 | 4.203614000  | -5.973478000 |
| C | 2.690245000  | -3.308050000 | 4.767276000  | H | -4.798468000 | 3.564769000  | -3.245327000 |
| C | 3.565345000  | -2.291954000 | 5.079540000  | H | -3.939743000 | 3.736013000  | -1.689266000 |
| C | 5.093711000  | -0.733160000 | 3.756706000  | H | -4.417306000 | 0.620613000  | -4.280168000 |
| C | 4.262440000  | 1.476753000  | 2.781984000  | H | -5.026975000 | -2.511386000 | -1.747515000 |
| C | 3.699960000  | 2.501798000  | 4.761191000  | H | -5.752230000 | -2.040216000 | -3.311256000 |
| C | 4.189491000  | 1.254017000  | 5.076120000  | H | -2.059698000 | -3.793391000 | -5.990250000 |
| C | 1.894422000  | -4.435508000 | 2.600922000  | H | -4.394960000 | -2.378232000 | -5.479495000 |
| C | 0.461985000  | -4.040589000 | 2.331328000  | H | 2.118791000  | -3.964505000 | 5.411346000  |
| C | 3.270013000  | 3.800451000  | 2.588551000  | H | 3.888387000  | -1.918600000 | 6.043412000  |
| C | 1.782942000  | 3.778834000  | 2.323891000  | H | 5.809762000  | -0.866594000 | 4.578858000  |
| C | 2.641223000  | 3.191143000  | -2.776512000 | H | 5.609605000  | -0.829423000 | 2.795522000  |
| C | 2.464577000  | 3.462408000  | -5.059425000 | H | 3.365347000  | 3.307649000  | 5.402325000  |
| C | 3.622143000  | 2.759077000  | -4.809466000 | H | 4.358806000  | 0.791212000  | 6.040389000  |
| C | 4.836007000  | 1.948304000  | -2.686596000 | H | 2.416472000  | -4.597747000 | 1.647111000  |
| C | 4.547290000  | 0.506271000  | -2.357406000 | H | 1.922830000  | -5.371691000 | 3.177387000  |
| C | 4.346772000  | -0.605797000 | -3.206996000 | H | 3.542552000  | 4.699710000  | 3.159531000  |
| C | 4.164547000  | -1.712399000 | -2.347931000 | H | 3.815379000  | 3.810797000  | 1.634016000  |
| C | 3.964634000  | -3.174772000 | -2.650348000 | H | 2.053126000  | 3.820234000  | -5.995262000 |
| C | 1.495948000  | -3.713291000 | -2.755034000 | H | 4.384611000  | 2.396689000  | -5.487982000 |
| C | 1.282348000  | -3.974973000 | -5.036722000 | H | 5.731316000  | 2.036280000  | -3.319528000 |
| C | 2.585044000  | -3.612053000 | -4.777499000 | H | 5.006816000  | 2.509313000  | -1.756369000 |
| C | -0.688818000 | -4.149620000 | 3.147496000  | H | 4.364344000  | -0.612584000 | -4.291508000 |
| C | 0.696276000  | 4.149482000  | 3.150346000  | H | 3.937823000  | -3.740809000 | -1.708146000 |
| C | 0.715315000  | 4.636392000  | -3.613138000 | H | 4.788434000  | -3.562470000 | -3.267737000 |
| C | -0.729565000 | -4.628952000 | -3.609193000 | H | 0.800890000  | -4.225020000 | -5.974090000 |
| H | -3.344088000 | -3.302738000 | 5.413443000  | H | 3.426351000  | -3.487374000 | -5.448073000 |
| H | -4.332431000 | -0.784177000 | 6.050939000  | H | -0.731179000 | -4.492320000 | 4.176365000  |
| H | -5.798597000 | 0.867454000  | 4.587426000  | H | 0.743210000  | 4.489355000  | 4.179925000  |
| H | -5.596211000 | 0.828730000  | 2.804467000  | H | 0.774268000  | 5.046307000  | -2.599347000 |
| H | -2.140969000 | 3.994695000  | 5.422531000  | H | 0.813511000  | 5.451010000  | -4.343852000 |

|                                       |              |              |              |   |              |              |              |
|---------------------------------------|--------------|--------------|--------------|---|--------------|--------------|--------------|
| H                                     | -0.784958000 | -5.037498000 | -2.594781000 | N | -4.333046000 | -0.696944000 | -1.020749000 |
| H                                     | -0.830265000 | -5.445042000 | -4.337914000 | N | -4.305586000 | -1.235087000 | 3.895459000  |
| H                                     | -3.439729000 | 3.458361000  | -5.434647000 | N | -3.215051000 | -3.065014000 | 3.388821000  |
| C                                     | 1.292420000  | -0.097677000 | -0.430548000 | N | -0.689385000 | -3.521150000 | 1.085463000  |
| C                                     | -0.011443000 | 0.040141000  | -0.612056000 | N | 0.713079000  | -3.524171000 | 1.078685000  |
| H                                     | 1.820786000  | 0.494229000  | 0.319172000  | N | 3.267308000  | -3.072352000 | 3.354363000  |
| C                                     | -1.322412000 | 0.160773000  | -0.747225000 | N | 4.364253000  | -1.240481000 | 3.842848000  |
| H                                     | -1.995784000 | -0.428556000 | -0.125180000 | C | 2.053682000  | 3.492575000  | -2.783483000 |
| H                                     | -1.777634000 | 0.853446000  | -1.455410000 | C | 3.113212000  | 3.278104000  | -4.811736000 |
| H                                     | 1.878568000  | -0.808389000 | -1.012703000 | C | 1.872173000  | 3.822531000  | -5.057824000 |
| <u>C<sub>3</sub>H<sub>4</sub>@PPX</u> |              |              |              | C | -0.028713000 | 4.711131000  | -3.603013000 |
| Au                                    | 1.584100000  | 3.426824000  | -0.832635000 | C | -2.098037000 | 3.495956000  | -2.754084000 |
| Au                                    | -1.585859000 | 3.408959000  | -0.814908000 | C | -3.189040000 | 3.284124000  | -4.767227000 |
| Au                                    | -4.122585000 | 1.568474000  | 0.873297000  | C | -1.951900000 | 3.827983000  | -5.032060000 |
| Au                                    | 4.138277000  | 1.570747000  | 0.823123000  | C | 4.410846000  | 2.595226000  | -2.693648000 |
| Au                                    | 1.579706000  | -3.428192000 | -0.832356000 | C | 4.345145000  | 1.123615000  | -2.381355000 |
| Au                                    | -1.590797000 | -3.408205000 | -0.814716000 | C | -4.455340000 | 2.602005000  | -2.630343000 |
| Au                                    | -4.124794000 | -1.564051000 | 0.873394000  | C | -4.391208000 | 1.129408000  | -2.322488000 |
| Au                                    | 4.136172000  | -1.575089000 | 0.823205000  | C | -3.880805000 | 2.011320000  | 2.815464000  |
| N                                     | 3.205324000  | 3.092769000  | -3.419867000 | C | -3.903269000 | 1.827754000  | 5.113487000  |
| N                                     | 1.228049000  | 3.953396000  | -3.808779000 | C | -3.213442000 | 2.975649000  | 4.792244000  |
| N                                     | -1.288453000 | 3.956648000  | -3.792544000 | C | -2.570351000 | 4.164024000  | 2.603697000  |
| N                                     | -3.259570000 | 3.096453000  | -3.373738000 | C | -1.104391000 | 3.936986000  | 2.326260000  |
| N                                     | 4.285352000  | 0.698127000  | -1.078173000 | C | 0.027510000  | 4.201030000  | 3.133055000  |
| N                                     | -4.331888000 | 0.701478000  | -1.020641000 | C | 1.151600000  | 3.940279000  | 2.316716000  |
| N                                     | -4.303886000 | 1.240068000  | 3.895347000  | C | 2.620273000  | 4.168005000  | 2.579434000  |
| N                                     | -3.210883000 | 3.068485000  | 3.388557000  | C | 3.931623000  | 2.012281000  | 2.770462000  |
| N                                     | -0.684494000 | 3.521320000  | 1.085388000  | C | 3.983161000  | 1.823065000  | 5.067236000  |
| N                                     | 0.717969000  | 3.523406000  | 1.078592000  | C | 3.292343000  | 2.973640000  | 4.757340000  |
| N                                     | 3.271585000  | 3.069775000  | 3.354093000  | C | 2.049446000  | -3.494728000 | -2.783149000 |
| N                                     | 4.366142000  | 1.236522000  | 3.842763000  | C | 3.109586000  | -3.282391000 | -4.811326000 |
| N                                     | 3.201653000  | -3.096550000 | -3.419514000 | C | 1.867940000  | -3.825414000 | -5.057406000 |
| N                                     | 1.223406000  | -3.954952000 | -3.808424000 | C | -0.034363000 | -4.711031000 | -3.602738000 |
| N                                     | -1.293135000 | -3.954922000 | -3.792412000 | C | -2.102688000 | -3.494019000 | -2.754021000 |
| N                                     | -3.263420000 | -3.092612000 | -3.373960000 | C | -3.192392000 | -3.279315000 | -4.767550000 |
| N                                     | 4.284459000  | -0.702818000 | -1.078132000 | C | -1.955784000 | -3.824510000 | -5.032156000 |

|   |              |              |              |                                       |              |              |              |
|---|--------------|--------------|--------------|---------------------------------------|--------------|--------------|--------------|
| C | 4.407706000  | -2.600233000 | -2.693321000 | H                                     | 2.859404000  | 3.727667000  | 5.402695000  |
| C | 4.343751000  | -1.128492000 | -2.381260000 | H                                     | 3.923374000  | -3.054038000 | -5.488556000 |
| C | -4.458869000 | -2.596998000 | -2.630818000 | H                                     | 1.420800000  | -4.154225000 | -5.987488000 |
| C | -4.393052000 | -1.124504000 | -2.322720000 | H                                     | -0.038105000 | -5.544861000 | -4.318141000 |
| C | -3.883435000 | -2.006909000 | 2.815641000  | H                                     | -0.028430000 | -5.106529000 | -2.581469000 |
| C | -3.905824000 | -1.823242000 | 5.113653000  | H                                     | -4.016551000 | -3.051297000 | -5.432278000 |
| C | -3.217552000 | -2.972100000 | 4.792492000  | H                                     | -1.523596000 | -4.155023000 | -5.968689000 |
| C | -2.575768000 | -4.161349000 | 2.604081000  | H                                     | 4.484480000  | -3.168384000 | -1.754995000 |
| C | -1.109602000 | -3.935730000 | 2.326568000  | H                                     | 5.282619000  | -2.831666000 | -3.318061000 |
| C | 0.022082000  | -4.200149000 | 3.133538000  | H                                     | -5.343032000 | -2.831553000 | -3.241262000 |
| C | 1.146370000  | -3.940717000 | 2.317056000  | H                                     | -4.519843000 | -3.162390000 | -1.689674000 |
| C | 2.614807000  | -4.169925000 | 2.579783000  | H                                     | -4.169510000 | -1.412428000 | 6.080425000  |
| C | 3.929060000  | -2.015992000 | 2.770636000  | H                                     | -2.776119000 | -3.727347000 | 5.430593000  |
| C | 3.979972000  | -1.826082000 | 5.067363000  | H                                     | -2.713745000 | -5.094670000 | 3.168656000  |
| C | 3.287633000  | -2.975771000 | 4.757578000  | H                                     | -3.121268000 | -4.241246000 | 1.653031000  |
| C | 4.386018000  | -0.002499000 | -3.234500000 | H                                     | 0.025757000  | -4.572860000 | 4.152839000  |
| C | -4.430800000 | 0.002565000  | -3.177025000 | H                                     | 3.150686000  | -4.255175000 | 1.623717000  |
| C | -5.110922000 | 0.003037000  | 3.794815000  | H                                     | 2.755967000  | -5.101221000 | 3.146684000  |
| C | 5.169248000  | -0.002588000 | 3.729154000  | H                                     | 4.255541000  | -1.413109000 | 6.029915000  |
| H | 3.926603000  | 3.048531000  | -5.489030000 | H                                     | 2.853428000  | -3.729001000 | 5.403012000  |
| H | 1.425286000  | 4.151514000  | -5.987968000 | H                                     | 4.463723000  | -0.002592000 | -4.316434000 |
| H | -0.031443000 | 5.544934000  | -4.318450000 | H                                     | -4.513145000 | 0.002736000  | -4.258723000 |
| H | -0.022144000 | 5.106660000  | -2.581761000 | H                                     | -5.630675000 | 0.003362000  | 2.830615000  |
| H | -4.013802000 | 3.057582000  | -5.431710000 | H                                     | -5.841928000 | 0.003578000  | 4.614380000  |
| H | -1.519795000 | 4.158717000  | -5.968555000 | H                                     | 5.673520000  | -0.003024000 | 2.756747000  |
| H | 4.488294000  | 3.163466000  | -1.755432000 | H                                     | 5.913351000  | -0.003116000 | 4.536832000  |
| H | 5.286002000  | 2.825521000  | -3.318468000 | H                                     | -2.770998000 | 3.730355000  | 5.430282000  |
| H | -5.339413000 | 2.837623000  | -3.240508000 | C                                     | -1.164944000 | -0.001868000 | -1.330983000 |
| H | -4.515464000 | 3.167321000  | -1.689095000 | C                                     | -0.204151000 | -0.000754000 | -0.561439000 |
| H | -4.167479000 | 1.417377000  | 6.080303000  | H                                     | -1.989994000 | -0.004196000 | -2.010446000 |
| H | -2.707372000 | 5.097565000  | 3.168143000  | C                                     | 0.974373000  | -0.000322000 | 0.318815000  |
| H | -3.115726000 | 4.244371000  | 1.652608000  | H                                     | 1.890802000  | -0.000254000 | -0.287861000 |
| H | 0.031487000  | 4.574177000  | 4.152196000  | H                                     | 0.995933000  | 0.899550000  | 0.955062000  |
| H | 3.156256000  | 4.252636000  | 1.623369000  | H                                     | 0.996013000  | -0.899954000 | 0.955460000  |
| H | 2.762379000  | 5.099168000  | 3.146304000  | <u>C<sub>3</sub>H<sub>6</sub>@PPX</u> |              |              |              |
| H | 4.258496000  | 1.409990000  | 6.029812000  | Au                                    | 1.427723000  | 3.525871000  | -0.831206000 |

|    |              |              |              |   |              |              |              |
|----|--------------|--------------|--------------|---|--------------|--------------|--------------|
| Au | -1.699116000 | 3.405184000  | -0.829717000 | C | -3.275656000 | 3.226732000  | -4.788438000 |
| Au | -4.095315000 | 1.417078000  | 0.847909000  | C | -2.071935000 | 3.844856000  | -5.045514000 |
| Au | 3.949804000  | 1.678382000  | 0.824175000  | C | 4.267692000  | 2.738882000  | -2.675949000 |
| Au | 1.704192000  | -3.417472000 | -0.835214000 | C | 4.214301000  | 1.263923000  | -2.377528000 |
| Au | -1.430256000 | -3.489021000 | -0.825329000 | C | -4.495893000 | 2.441333000  | -2.658906000 |
| Au | -3.989807000 | -1.698007000 | 0.848437000  | C | -4.338054000 | 0.975185000  | -2.354228000 |
| Au | 4.108924000  | -1.436443000 | 0.819510000  | C | -3.943064000 | 1.878755000  | 2.795230000  |
| N  | 3.068161000  | 3.238025000  | -3.409818000 | C | -4.037971000 | 1.712474000  | 5.092354000  |
| N  | 1.087905000  | 4.084628000  | -3.807060000 | C | -3.398150000 | 2.892761000  | 4.784029000  |
| N  | -1.418188000 | 3.996745000  | -3.803634000 | C | -2.743459000 | 4.095118000  | 2.604163000  |
| N  | -3.335373000 | 3.018925000  | -3.397796000 | C | -1.271096000 | 3.916462000  | 2.330182000  |
| N  | 4.098284000  | 0.827134000  | -1.081238000 | C | -0.150603000 | 4.198117000  | 3.146455000  |
| N  | -4.217508000 | 0.552497000  | -1.054853000 | C | 0.983188000  | 3.988629000  | 2.328388000  |
| N  | -4.364304000 | 1.095110000  | 3.866641000  | C | 2.442369000  | 4.259941000  | 2.599088000  |
| N  | -3.351091000 | 2.974254000  | 3.380535000  | C | 3.797998000  | 2.132246000  | 2.773078000  |
| N  | -0.833823000 | 3.538050000  | 1.083583000  | C | 3.924460000  | 1.966716000  | 5.068366000  |
| N  | 0.565706000  | 3.583592000  | 1.081973000  | C | 3.193945000  | 3.095643000  | 4.769430000  |
| N  | 3.129113000  | 3.177967000  | 3.366512000  | C | 2.184497000  | -3.487870000 | -2.783287000 |
| N  | 4.286703000  | 1.379340000  | 3.837864000  | C | 3.240475000  | -3.241746000 | -4.810085000 |
| N  | 3.315147000  | -3.033463000 | -3.420473000 | C | 2.031814000  | -3.855730000 | -5.054214000 |
| N  | 1.390236000  | -4.004230000 | -3.805999000 | C | 0.160621000  | -4.801506000 | -3.596160000 |
| N  | -1.117569000 | -4.082340000 | -3.796131000 | C | -1.931254000 | -3.610695000 | -2.766418000 |
| N  | -3.099014000 | -3.241198000 | -3.392140000 | C | -3.028656000 | -3.457450000 | -4.780953000 |
| N  | 4.162403000  | -0.570504000 | -1.085556000 | C | -1.784391000 | -3.989496000 | -5.036756000 |
| N  | -4.166731000 | -0.844813000 | -1.054883000 | C | 4.481832000  | -2.450624000 | -2.694623000 |
| N  | -4.263318000 | -1.380707000 | 3.867094000  | C | 4.313609000  | -0.986929000 | -2.384084000 |
| N  | -3.104594000 | -3.174308000 | 3.381687000  | C | -4.300405000 | -2.750160000 | -2.655693000 |
| N  | -0.551254000 | -3.555077000 | 1.084977000  | C | -4.254396000 | -1.276019000 | -2.354093000 |
| N  | 0.849497000  | -3.522814000 | 1.079638000  | C | -3.791475000 | -2.135752000 | 2.796521000  |
| N  | 3.380576000  | -2.980702000 | 3.360558000  | C | -3.873868000 | -1.959965000 | 5.092902000  |
| N  | 4.392309000  | -1.097567000 | 3.835524000  | C | -3.142615000 | -3.086085000 | 4.785051000  |
| C  | 1.908132000  | 3.622297000  | -2.778916000 | C | -2.419525000 | -4.249342000 | 2.605327000  |
| C  | 2.987398000  | 3.438001000  | -4.800306000 | C | -0.962753000 | -3.971496000 | 2.329165000  |
| C  | 1.743572000  | 3.973621000  | -5.051863000 | C | 0.174209000  | -4.196792000 | 3.139389000  |
| C  | -0.191836000 | 4.801234000  | -3.605521000 | C | 1.292144000  | -3.915619000 | 2.321033000  |
| C  | -2.200078000 | 3.478487000  | -2.772018000 | C | 2.764847000  | -4.102749000 | 2.591211000  |

|   |              |              |              |                                       |              |              |              |
|---|--------------|--------------|--------------|---------------------------------------|--------------|--------------|--------------|
| C | 3.978180000  | -1.891331000 | 2.769389000  | H                                     | -2.691737000 | -3.828586000 | 5.431535000  |
| C | 4.058262000  | -1.703447000 | 5.064883000  | H                                     | -2.523307000 | -5.183305000 | 3.176079000  |
| C | 3.419187000  | -2.885949000 | 4.763650000  | H                                     | -2.958788000 | -4.357423000 | 1.653424000  |
| C | 4.349554000  | 0.144866000  | -3.230518000 | H                                     | 0.187120000  | -4.560119000 | 4.162031000  |
| C | -4.364485000 | -0.153125000 | -3.206006000 | H                                     | 3.306842000  | -4.180944000 | 1.638060000  |
| C | -5.114524000 | -0.175206000 | 3.747960000  | H                                     | 2.929218000  | -5.024866000 | 3.166668000  |
| C | 5.138061000  | 0.174577000  | 3.708460000  | H                                     | 4.328645000  | -1.278515000 | 6.023693000  |
| H | 3.808986000  | 3.223484000  | -5.472578000 | H                                     | 3.033923000  | -3.661177000 | 5.414145000  |
| H | 1.301488000  | 4.308623000  | -5.982164000 | H                                     | 4.489932000  | 0.154082000  | -4.306196000 |
| H | -0.221783000 | 5.635837000  | -4.319223000 | H                                     | -4.484188000 | -0.157702000 | -4.284272000 |
| H | -0.204140000 | 5.192630000  | -2.582557000 | H                                     | -5.610950000 | -0.195903000 | 2.771766000  |
| H | -4.084895000 | 2.959096000  | -5.456657000 | H                                     | -5.864544000 | -0.205406000 | 4.549583000  |
| H | -1.658750000 | 4.211001000  | -5.977365000 | H                                     | 5.623012000  | 0.195866000  | 2.726425000  |
| H | 4.330727000  | 3.298307000  | -1.731447000 | H                                     | 5.897133000  | 0.206836000  | 4.501511000  |
| H | 5.148645000  | 2.980042000  | -3.288113000 | H                                     | -3.017317000 | 3.674217000  | 5.429698000  |
| H | -5.392678000 | 2.618731000  | -3.270096000 | C                                     | -0.798545000 | 0.058715000  | -0.961867000 |
| H | -4.595359000 | 2.998604000  | -1.716226000 | C                                     | 0.430201000  | 0.165630000  | -0.394110000 |
| H | -4.313568000 | 1.295959000  | 6.053405000  | H                                     | -0.959504000 | 0.182015000  | -2.036678000 |
| H | -2.913822000 | 5.019726000  | 3.174036000  | H                                     | -1.680241000 | -0.147354000 | -0.349765000 |
| H | -3.286679000 | 4.163354000  | 1.650920000  | C                                     | 0.678805000  | 0.019067000  | 1.093004000  |
| H | -0.160895000 | 4.550755000  | 4.172831000  | H                                     | 1.309557000  | 0.378892000  | -1.014425000 |
| H | 2.977647000  | 4.371347000  | 1.645344000  | H                                     | 1.169745000  | 0.925614000  | 1.489128000  |
| H | 2.552974000  | 5.189699000  | 3.175237000  | H                                     | -0.268348000 | -0.143500000 | 1.634337000  |
| H | 4.239038000  | 1.569889000  | 6.025769000  | H                                     | 1.345320000  | -0.838522000 | 1.289258000  |
| H | 2.760203000  | 3.843934000  | 5.420954000  | <u>C<sub>3</sub>H<sub>8</sub>@PPX</u> |              |              |              |
| H | 4.043425000  | -2.976800000 | -5.486890000 | Au                                    | -1.848272000 | -3.448099000 | -0.816695000 |
| H | 1.607387000  | -4.220334000 | -5.981597000 | Au                                    | 1.300993000  | -3.624855000 | -0.837572000 |
| H | 0.183971000  | -5.641095000 | -4.304258000 | Au                                    | 3.913920000  | -1.832995000 | 0.823294000  |
| H | 0.176237000  | -5.186726000 | -2.571033000 | Au                                    | -4.116214000 | -1.296170000 | 0.865442000  |
| H | -3.857301000 | -3.255640000 | -5.448514000 | Au                                    | -1.299902000 | 3.623615000  | -0.828951000 |
| H | -1.348760000 | -4.333713000 | -5.966734000 | Au                                    | 1.848501000  | 3.464006000  | -0.837394000 |
| H | 4.598551000  | -3.010547000 | -1.755493000 | Au                                    | 4.130482000  | 1.298423000  | 0.832725000  |
| H | 5.371651000  | -2.617878000 | -3.318413000 | Au                                    | -3.881151000 | 1.826097000  | 0.853692000  |
| H | -5.180316000 | -2.996700000 | -3.267331000 | N                                     | -3.457429000 | -2.924565000 | -3.377785000 |
| H | -4.358857000 | -3.311141000 | -1.711741000 | N                                     | -1.571707000 | -3.953661000 | -3.805405000 |
| H | -4.171269000 | -1.559751000 | 6.054373000  | N                                     | 0.931241000  | -4.103464000 | -3.821881000 |

|   |              |              |              |   |              |              |              |
|---|--------------|--------------|--------------|---|--------------|--------------|--------------|
| N | 2.937262000  | -3.320279000 | -3.417648000 | C | 0.849186000  | -4.049437000 | 2.328422000  |
| N | -4.205052000 | -0.429142000 | -1.037050000 | C | -0.283873000 | -4.199867000 | 3.161501000  |
| N | 4.071717000  | -0.966994000 | -1.077057000 | C | -1.402850000 | -3.911388000 | 2.346236000  |
| N | 4.219910000  | -1.527941000 | 3.839274000  | C | -2.878944000 | -4.024060000 | 2.637835000  |
| N | 3.016335000  | -3.294711000 | 3.362630000  | C | -3.978127000 | -1.754022000 | 2.814090000  |
| N | 0.433225000  | -3.674906000 | 1.072994000  | C | -4.049673000 | -1.561880000 | 5.110055000  |
| N | -0.965286000 | -3.589937000 | 1.083367000  | C | -3.463654000 | -2.771601000 | 4.809396000  |
| N | -3.429744000 | -2.868640000 | 3.406278000  | C | -1.790499000 | 3.682465000  | -2.775484000 |
| N | -4.357792000 | -0.942670000 | 3.880519000  | C | -2.879171000 | 3.471313000  | -4.788637000 |
| N | -2.961605000 | 3.310673000  | -3.393178000 | C | -1.623622000 | 3.969515000  | -5.057272000 |
| N | -0.961840000 | 4.098092000  | -3.817369000 | C | 0.332678000  | 4.795589000  | -3.640101000 |
| N | 1.541378000  | 3.961309000  | -3.824962000 | C | 2.321937000  | 3.453111000  | -2.787926000 |
| N | 3.428617000  | 2.928565000  | -3.412787000 | C | 3.353769000  | 3.089337000  | -4.808379000 |
| N | -4.087964000 | 0.964135000  | -1.042991000 | C | 2.169280000  | 3.742444000  | -5.069648000 |
| N | 4.179842000  | 0.427681000  | -1.073312000 | C | -4.177819000 | 2.869072000  | -2.648477000 |
| N | 4.401007000  | 0.947205000  | 3.845765000  | C | -4.189964000 | 1.395687000  | -2.341109000 |
| N | 3.468415000  | 2.872765000  | 3.377127000  | C | 4.566175000  | 2.303914000  | -2.674652000 |
| N | 0.987130000  | 3.608645000  | 1.070420000  | C | 4.342821000  | 0.845895000  | -2.370455000 |
| N | -0.411435000 | 3.687574000  | 1.072758000  | C | 4.013565000  | 1.758038000  | 2.781618000  |
| N | -2.974384000 | 3.297961000  | 3.385991000  | C | 4.100571000  | 1.566695000  | 5.077166000  |
| N | -4.174632000 | 1.531721000  | 3.871590000  | C | 3.511898000  | 2.775991000  | 4.780123000  |
| C | -2.345068000 | -3.448126000 | -2.761634000 | C | 2.914304000  | 4.029380000  | 2.612328000  |
| C | -3.392005000 | -3.082128000 | -4.774458000 | C | 1.435682000  | 3.920695000  | 2.331406000  |
| C | -2.208706000 | -3.733032000 | -5.045314000 | C | 0.323144000  | 4.202010000  | 3.158228000  |
| C | -0.365334000 | -4.793587000 | -3.630874000 | C | -0.816683000 | 4.054253000  | 2.334031000  |
| C | 1.771521000  | -3.689893000 | -2.788784000 | C | -2.267844000 | 4.360084000  | 2.611748000  |
| C | 2.840760000  | -3.481794000 | -4.812049000 | C | -3.681606000 | 2.273086000  | 2.800245000  |
| C | 1.581395000  | -3.977380000 | -5.068133000 | C | -3.777700000 | 2.106108000  | 5.097400000  |
| C | -4.594190000 | -2.308245000 | -2.631756000 | C | -3.020639000 | 3.214742000  | 4.789570000  |
| C | -4.378601000 | -0.848623000 | -2.332013000 | C | -4.374126000 | 0.277488000  | -3.186261000 |
| C | 4.159166000  | -2.873079000 | -2.684354000 | C | 4.337038000  | -0.281198000 | -3.223754000 |
| C | 4.165584000  | -1.399353000 | -2.376096000 | C | 5.106344000  | -0.348325000 | 3.715465000  |
| C | 3.728274000  | -2.275751000 | 2.771859000  | C | -5.062873000 | 0.352969000  | 3.754374000  |
| C | 3.818900000  | -2.093385000 | 5.068038000  | H | -4.185482000 | -2.761497000 | -5.438170000 |
| C | 3.059666000  | -3.202058000 | 4.765813000  | H | -1.800692000 | -4.079608000 | -5.986835000 |
| C | 2.302775000  | -4.356664000 | 2.594105000  | H | -0.418420000 | -5.609702000 | -4.364282000 |

|   |              |              |              |                          |              |              |              |
|---|--------------|--------------|--------------|--------------------------|--------------|--------------|--------------|
| H | -0.383374000 | -5.209164000 | -2.617736000 | H                        | 5.592327000  | -0.381647000 | 2.734303000  |
| H | 3.663374000  | -3.272552000 | -5.484680000 | H                        | 5.862997000  | -0.405230000 | 4.509537000  |
| H | 1.124984000  | -4.277250000 | -6.003435000 | H                        | -5.555939000 | 0.386159000  | 2.776838000  |
| H | -4.707927000 | -2.860815000 | -1.688012000 | H                        | -5.813959000 | 0.411317000  | 4.553552000  |
| H | -5.500097000 | -2.454125000 | -3.237696000 | H                        | 2.593067000  | -3.931544000 | 5.415915000  |
| H | 5.026522000  | -3.146035000 | -3.302655000 | C                        | -0.691758000 | -0.138362000 | -1.402921000 |
| H | 4.204470000  | -3.441524000 | -1.744142000 | C                        | -0.690142000 | -0.004826000 | 0.139101000  |
| H | 4.128612000  | -1.697893000 | 6.027554000  | H                        | -1.714243000 | -0.236795000 | -1.797154000 |
| H | 2.392929000  | -5.291417000 | 3.166194000  | H                        | -0.217404000 | 0.751493000  | -1.857634000 |
| H | 2.831754000  | -4.477820000 | 1.638069000  | H                        | -0.118379000 | -1.035979000 | -1.704194000 |
| H | -0.295888000 | -4.519619000 | 4.198461000  | C                        | 0.753463000  | -0.009143000 | 0.694422000  |
| H | -3.434979000 | -4.080633000 | 1.691250000  | H                        | -1.199631000 | 0.930703000  | 0.426093000  |
| H | -3.082924000 | -4.933456000 | 3.221036000  | H                        | -1.259445000 | -0.838999000 | 0.585484000  |
| H | -4.300336000 | -1.124925000 | 6.068808000  | H                        | 0.782318000  | 0.194648000  | 1.779522000  |
| H | -3.113189000 | -3.562843000 | 5.460331000  | H                        | 1.219574000  | -0.990468000 | 0.511826000  |
| H | -3.707985000 | 3.260025000  | -5.452964000 | H                        | 1.363280000  | 0.755532000  | 0.185660000  |
| H | -1.176733000 | 4.269552000  | -5.997131000 | <u>I,2-butadiene@PPX</u> |              |              |              |
| H | 0.374452000  | 5.610552000  | -4.375491000 | Au                       | -0.663999000 | 3.799426000  | 0.839630000  |
| H | 0.358324000  | 5.213484000  | -2.628094000 | Au                       | 2.405277000  | 3.125964000  | 0.859443000  |
| H | 4.141667000  | 2.768302000  | -5.478507000 | Au                       | 4.273668000  | 0.641087000  | -0.795981000 |
| H | 1.754811000  | 4.090865000  | -6.007702000 | Au                       | -3.455705000 | 2.380623000  | -0.837715000 |
| H | -4.210738000 | 3.436566000  | -1.707227000 | Au                       | -2.462383000 | -3.171210000 | 0.817506000  |
| H | -5.050234000 | 3.147350000  | -3.257301000 | Au                       | 0.622211000  | -3.766090000 | 0.846064000  |
| H | 5.468113000  | 2.441218000  | -3.288460000 | Au                       | 3.441895000  | -2.361858000 | -0.801297000 |
| H | 4.692936000  | 2.857366000  | -1.733033000 | Au                       | -4.258512000 | -0.642967000 | -0.855949000 |
| H | 4.358127000  | 1.130456000  | 6.034401000  | N                        | -2.350015000 | 3.729322000  | 3.404179000  |
| H | 3.165572000  | 3.567255000  | 5.433232000  | N                        | -0.257796000 | 4.222317000  | 3.828384000  |
| H | 3.125202000  | 4.938201000  | 3.194067000  | N                        | 2.191405000  | 3.703983000  | 3.843690000  |
| H | 3.463793000  | 4.084320000  | 1.661804000  | N                        | 3.878500000  | 2.366706000  | 3.443941000  |
| H | 0.343243000  | 4.515487000  | 4.196975000  | N                        | -3.803200000 | 1.565228000  | 1.059716000  |
| H | -2.804614000 | 4.480622000  | 1.659961000  | N                        | 4.137156000  | -0.217106000 | 1.110697000  |
| H | -2.354523000 | 5.294869000  | 3.184290000  | N                        | 4.511022000  | 0.237189000  | -3.804780000 |
| H | -4.088415000 | 1.715797000  | 6.058723000  | N                        | 3.927235000  | 2.296374000  | -3.347637000 |
| H | -2.557095000 | 3.949630000  | 5.435790000  | N                        | 1.586363000  | 3.409144000  | -1.052862000 |
| H | -4.520279000 | 0.285428000  | -4.261190000 | N                        | 0.218616000  | 3.705553000  | -1.061082000 |
| H | 4.473219000  | -0.289383000 | -4.300004000 | N                        | -2.372797000 | 3.712692000  | -3.377524000 |

|   |              |              |              |   |              |              |              |
|---|--------------|--------------|--------------|---|--------------|--------------|--------------|
| N | -3.853683000 | 2.170920000  | -3.850573000 | C | -3.898960000 | -2.537706000 | 4.781226000  |
| N | -3.943271000 | -2.375537000 | 3.384410000  | C | -2.845230000 | -3.383721000 | 5.049052000  |
| N | -2.263221000 | -3.715190000 | 3.806891000  | C | -1.198255000 | -4.726994000 | 3.629314000  |
| N | 0.185465000  | -4.235390000 | 3.826354000  | C | 1.073625000  | -3.924821000 | 2.796720000  |
| N | 2.282114000  | -3.739244000 | 3.427065000  | C | 2.167469000  | -3.915674000 | 4.818319000  |
| N | -4.166110000 | 0.215049000  | 1.053167000  | C | 0.850697000  | -4.230763000 | 5.071417000  |
| N | 3.771178000  | -1.566458000 | 1.107319000  | C | -4.939905000 | -1.550493000 | 2.640708000  |
| N | 3.898017000  | -2.165094000 | -3.806022000 | C | -4.444841000 | -0.158766000 | 2.343970000  |
| N | 2.400525000  | -3.696895000 | -3.351615000 | C | 3.555813000  | -3.478457000 | 2.692638000  |
| N | -0.231766000 | -3.686067000 | -1.069814000 | C | 3.804723000  | -2.022311000 | 2.401047000  |
| N | -1.603536000 | -3.403464000 | -1.084487000 | C | 3.250435000  | -2.797963000 | -2.748548000 |
| N | -3.904474000 | -2.295205000 | -3.412720000 | C | 3.448481000  | -2.676840000 | -5.041554000 |
| N | -4.475696000 | -0.231255000 | -3.866234000 | C | 2.505083000  | -3.638538000 | -4.753792000 |
| C | -1.137843000 | 3.933160000  | 2.786563000  | C | 1.520670000  | -4.631783000 | -2.589934000 |
| C | -2.244930000 | 3.874685000  | 4.799805000  | C | 0.131769000  | -4.104792000 | -2.327512000 |
| C | -0.930700000 | 4.187848000  | 5.068389000  | C | -1.006442000 | -4.080856000 | -3.166791000 |
| C | 1.128381000  | 4.714279000  | 3.650297000  | C | -2.075792000 | -3.643622000 | -2.352437000 |
| C | 2.870913000  | 3.057390000  | 2.812334000  | C | -3.548770000 | -3.531314000 | -2.654967000 |
| C | 3.840369000  | 2.561091000  | 4.836655000  | C | -4.232801000 | -1.103969000 | -2.808957000 |
| C | 2.782038000  | 3.405424000  | 5.090321000  | C | -4.301955000 | -0.887912000 | -5.102368000 |
| C | -3.616904000 | 3.472966000  | 2.656604000  | C | -3.939341000 | -2.185331000 | -4.814603000 |
| C | -3.861861000 | 2.017802000  | 2.354374000  | C | -4.261429000 | 0.954545000  | 3.196187000  |
| C | 4.885868000  | 1.542565000  | 2.713462000  | C | 4.191293000  | -0.962085000 | 3.253803000  |
| C | 4.393530000  | 0.152566000  | 2.407956000  | C | 4.975607000  | -1.159389000 | -3.664017000 |
| C | 4.279283000  | 1.110631000  | -2.746140000 | C | -4.934913000 | 1.167902000  | -3.723458000 |
| C | 4.305451000  | 0.886884000  | -5.040177000 | H | -3.095022000 | 3.783031000  | 5.464494000  |
| C | 3.935130000  | 2.181331000  | -4.750321000 | H | -0.445622000 | 4.419313000  | 6.008700000  |
| C | 3.561423000  | 3.526976000  | -2.588409000 | H | 1.293107000  | 5.517832000  | 4.380847000  |
| C | 2.082966000  | 3.644306000  | -2.311280000 | H | 1.219718000  | 5.115449000  | 2.635305000  |
| C | 1.030377000  | 4.089415000  | -3.145216000 | H | 4.568390000  | 2.125186000  | 5.509606000  |
| C | -0.121295000 | 4.124169000  | -2.325427000 | H | 2.437163000  | 3.834011000  | 6.023325000  |
| C | -1.504739000 | 4.652866000  | -2.609160000 | H | -3.556754000 | 4.034401000  | 1.713150000  |
| C | -3.221826000 | 2.806892000  | -2.784654000 | H | -4.438543000 | 3.885700000  | 3.259747000  |
| C | -3.393318000 | 2.686529000  | -5.080177000 | H | 5.793662000  | 1.509473000  | 3.332652000  |
| C | -2.460167000 | 3.654257000  | -4.780338000 | H | 5.118303000  | 2.060835000  | 1.771936000  |
| C | -2.944804000 | -3.089572000 | 2.764902000  | H | 4.476180000  | 0.404906000  | -5.994848000 |



|   |              |              |              |                          |              |              |              |
|---|--------------|--------------|--------------|--------------------------|--------------|--------------|--------------|
| H | 3.908089000  | 4.390772000  | -3.173612000 | C                        | 1.076229000  | 0.027219000  | -2.264508000 |
| H | 4.111823000  | 3.501445000  | -1.637148000 | H                        | -0.670063000 | -0.947777000 | 1.736455000  |
| H | 1.103365000  | 4.392490000  | -4.184659000 | H                        | -1.462122000 | -0.273563000 | 0.282147000  |
| H | -2.016633000 | 4.864450000  | -1.659517000 | H                        | -0.917030000 | 0.823208000  | 1.583161000  |
| H | -1.441584000 | 5.585339000  | -3.188433000 | H                        | 1.266049000  | -0.900611000 | -2.813049000 |
| H | -3.783116000 | 2.363179000  | -6.037534000 | H                        | 1.572781000  | 0.144937000  | 1.014832000  |
| H | -1.896950000 | 4.311846000  | -5.430695000 | H                        | 1.057220000  | 0.960167000  | -2.838304000 |
| H | -4.620862000 | -2.082033000 | 5.447647000  | <u>1,3-butadiene@PPX</u> |              |              |              |
| H | -2.498891000 | -3.793092000 | 5.990058000  | Au                       | -3.970811000 | 1.170864000  | -0.838879000 |
| H | -1.372796000 | -5.530013000 | 4.358199000  | Au                       | -3.657308000 | -1.940188000 | -0.832889000 |
| H | -1.276026000 | -5.128208000 | 2.613158000  | Au                       | -1.181839000 | -3.833888000 | 0.853889000  |
| H | 3.013398000  | -3.841138000 | 5.490433000  | Au                       | -1.940173000 | 3.550128000  | 0.845218000  |
| H | 0.358974000  | -4.482370000 | 6.003104000  | Au                       | 3.607152000  | 1.921282000  | -0.821711000 |
| H | -5.158985000 | -2.068643000 | 1.696041000  | Au                       | 3.947245000  | -1.182645000 | -0.815111000 |
| H | -5.856710000 | -1.517892000 | 3.246659000  | Au                       | 1.936867000  | -3.559856000 | 0.857086000  |
| H | 4.371525000  | -3.895789000 | 3.300679000  | Au                       | 1.174604000  | 3.882154000  | 0.846802000  |
| H | 3.504841000  | -4.032933000 | 1.744517000  | N                        | -3.494913000 | 2.788764000  | -3.394455000 |
| H | 3.853768000  | -2.357400000 | -5.993803000 | N                        | -4.309599000 | 0.807193000  | -3.845927000 |
| H | 1.946341000  | -4.292721000 | -5.411370000 | N                        | -4.059335000 | -1.670502000 | -3.840232000 |
| H | 1.464870000  | -5.567368000 | -3.165000000 | N                        | -2.858421000 | -3.443010000 | -3.380507000 |
| H | 2.019798000  | -4.837813000 | -1.632381000 | N                        | -1.085886000 | 3.726359000  | -1.060720000 |
| H | -1.058566000 | -4.383872000 | -4.207485000 | N                        | -0.308355000 | -3.858317000 | -1.050682000 |
| H | -4.116458000 | -3.514174000 | -1.713593000 | N                        | -0.833597000 | -4.249272000 | 3.852508000  |
| H | -3.883739000 | -4.390939000 | -3.252738000 | N                        | -2.830913000 | -3.465799000 | 3.412088000  |
| H | -4.482258000 | -0.406555000 | -6.055631000 | N                        | -3.842163000 | -1.084749000 | 1.073592000  |
| H | -3.744984000 | -3.022701000 | -5.473135000 | N                        | -3.983497000 | 0.307857000  | 1.071570000  |
| H | -4.433111000 | 0.995144000  | 4.266640000  | N                        | -3.478732000 | 2.850056000  | 3.403817000  |
| H | 4.342172000  | -1.005773000 | 4.327245000  | N                        | -1.676778000 | 4.014994000  | 3.844607000  |
| H | 5.429317000  | -1.275555000 | -2.673615000 | N                        | 2.854929000  | 3.434851000  | -3.379924000 |
| H | 5.724388000  | -1.352620000 | -4.444055000 | N                        | 4.044718000  | 1.650684000  | -3.822153000 |
| H | -5.398999000 | 1.281900000  | -2.737839000 | N                        | 4.298860000  | -0.824920000 | -3.818198000 |
| H | -5.676184000 | 1.365800000  | -4.509364000 | N                        | 3.497264000  | -2.812460000 | -3.369861000 |
| H | 3.724069000  | 3.015411000  | -5.407868000 | N                        | 0.306513000  | 3.874718000  | -1.058452000 |
| C | 0.890735000  | 0.022197000  | -0.949046000 | N                        | 1.085753000  | -3.732269000 | -1.047841000 |
| C | 0.698114000  | 0.029151000  | 0.364295000  | N                        | 1.651757000  | -4.009012000 | 3.856354000  |
| C | -0.670320000 | -0.099826000 | 1.026309000  | N                        | 3.458098000  | -2.849110000 | 3.422391000  |

|   |              |              |              |   |              |              |              |
|---|--------------|--------------|--------------|---|--------------|--------------|--------------|
| N | 3.959690000  | -0.311582000 | 1.089082000  | C | 1.540345000  | -3.977905000 | -2.319398000 |
| N | 3.813973000  | 1.078307000  | 1.085518000  | C | 2.401095000  | -3.478535000 | 2.808063000  |
| N | 2.804191000  | 3.474894000  | 3.409936000  | C | 2.250664000  | -3.704378000 | 5.097267000  |
| N | 0.807565000  | 4.261822000  | 3.847943000  | C | 3.384154000  | -2.971491000 | 4.821798000  |
| C | -3.937826000 | 1.635750000  | -2.790470000 | C | 4.546131000  | -2.153681000 | 2.672217000  |
| C | -3.578067000 | 2.697020000  | -4.795534000 | C | 4.237842000  | -0.709402000 | 2.373433000  |
| C | -4.093249000 | 1.451891000  | -5.081854000 | C | 4.267969000  | 0.429175000  | 3.211582000  |
| C | -4.967178000 | -0.510402000 | -3.697880000 | C | 4.003200000  | 1.532435000  | 2.367553000  |
| C | -3.530489000 | -2.403962000 | -2.781156000 | C | 4.007975000  | 3.011248000  | 2.657261000  |
| C | -2.954927000 | -3.373833000 | -4.781991000 | C | 1.644343000  | 3.888834000  | 2.797990000  |
| C | -3.713173000 | -2.261346000 | -5.073591000 | C | 1.454912000  | 4.074774000  | 5.087762000  |
| C | -3.015355000 | 3.980448000  | -2.633776000 | C | 2.708975000  | 3.576863000  | 4.809818000  |
| C | -1.537441000 | 3.955779000  | -2.338141000 | C | -0.433083000 | 4.247228000  | -3.170469000 |
| C | -2.147172000 | -4.509683000 | -2.616437000 | C | 0.436835000  | -4.265508000 | -3.154838000 |
| C | -0.704195000 | -4.187044000 | -2.324629000 | C | 0.485082000  | -4.904256000 | 3.692154000  |
| C | -1.661460000 | -3.857054000 | 2.802633000  | C | -0.510649000 | 4.914460000  | 3.685984000  |
| C | -1.494113000 | -4.092704000 | 5.089418000  | H | -3.306156000 | 3.512750000  | -5.453758000 |
| C | -2.748919000 | -3.597284000 | 4.810507000  | H | -4.350794000 | 1.003197000  | -6.033340000 |
| C | -4.034928000 | -3.009014000 | 2.656234000  | H | -5.742278000 | -0.590351000 | -4.471930000 |
| C | -4.033878000 | -1.531890000 | 2.358128000  | H | -5.429085000 | -0.554684000 | -2.705667000 |
| C | -4.298641000 | -0.424622000 | 3.196672000  | H | -2.520302000 | -4.118683000 | -5.436881000 |
| C | -4.262877000 | 0.710711000  | 2.354527000  | H | -4.054178000 | -1.877168000 | -6.027080000 |
| C | -4.564690000 | 2.157498000  | 2.648739000  | H | -3.577475000 | 4.011832000  | -1.689258000 |
| C | -2.414874000 | 3.473645000  | 2.794185000  | H | -3.272154000 | 4.870823000  | -3.225451000 |
| C | -2.288353000 | 3.722218000  | 5.082066000  | H | -2.220382000 | -5.436227000 | -3.203866000 |
| C | -3.419222000 | 2.986644000  | 4.802769000  | H | -2.689736000 | -4.649662000 | -1.670428000 |
| C | 3.515057000  | 2.394827000  | -2.769413000 | H | -1.047821000 | -4.374614000 | 6.035159000  |
| C | 2.955670000  | 3.355331000  | -4.781048000 | H | -4.917620000 | -3.281907000 | 3.252203000  |
| C | 3.707224000  | 2.235954000  | -5.062250000 | H | -4.059935000 | -3.571435000 | 1.711725000  |
| C | 4.955221000  | 0.493395000  | -3.668616000 | H | -4.525438000 | -0.446235000 | 4.257511000  |
| C | 3.943671000  | -1.662637000 | -2.762568000 | H | -4.703383000 | 2.700849000  | 1.703087000  |
| C | 3.561802000  | -2.711139000 | -4.771831000 | H | -5.484703000 | 2.246283000  | 3.244231000  |
| C | 4.069748000  | -1.462939000 | -5.056799000 | H | -1.903672000 | 4.081638000  | 6.028656000  |
| C | 2.148023000  | 4.510195000  | -2.625276000 | H | -4.181942000 | 2.593374000  | 5.463413000  |
| C | 0.704487000  | 4.190879000  | -2.333245000 | H | 2.531138000  | 4.100186000  | -5.442533000 |
| C | 3.019020000  | -4.005338000 | -2.611076000 | H | 4.055614000  | 1.846995000  | -6.011218000 |

|                     |              |              |              |    |              |              |              |
|---------------------|--------------|--------------|--------------|----|--------------|--------------|--------------|
| H                   | 5.735570000  | 0.572666000  | -4.437470000 | Au | 1.565076000  | -3.437811000 | -0.831205000 |
| H                   | 5.407948000  | 0.541067000  | -2.672361000 | Au | 3.999014000  | -1.530662000 | 0.848175000  |
| H                   | 3.287143000  | -3.524620000 | -5.431733000 | Au | -4.058649000 | -1.576106000 | 0.824293000  |
| H                   | 4.320863000  | -1.010027000 | -6.008057000 | Au | -1.602201000 | 3.481346000  | -0.839999000 |
| H                   | 2.690226000  | 4.654021000  | -1.679781000 | Au | 1.537649000  | 3.447030000  | -0.832994000 |
| H                   | 2.224547000  | 5.432071000  | -3.219649000 | Au | 3.987164000  | 1.557724000  | 0.845964000  |
| H                   | 3.277505000  | -4.895559000 | -3.202317000 | Au | -4.071881000 | 1.549387000  | 0.824379000  |
| H                   | 3.579243000  | -4.034077000 | -1.665514000 | N  | -3.195501000 | -3.140580000 | -3.419454000 |
| H                   | 1.856792000  | -4.054692000 | 6.043456000  | N  | -1.234887000 | -4.033037000 | -3.816578000 |
| H                   | 4.140376000  | -2.571522000 | 5.485782000  | N  | 1.273356000  | -4.019017000 | -3.808127000 |
| H                   | 5.462459000  | -2.236913000 | 3.274177000  | N  | 3.224409000  | -3.113551000 | -3.394927000 |
| H                   | 4.693228000  | -2.698133000 | 1.728408000  | N  | -4.156604000 | -0.712917000 | -1.081964000 |
| H                   | 4.496501000  | 0.455696000  | 4.272002000  | N  | 4.149538000  | -0.685120000 | -1.061133000 |
| H                   | 4.035698000  | 3.568320000  | 1.709728000  | N  | 4.306458000  | -1.220829000 | 3.864691000  |
| H                   | 4.890482000  | 3.284854000  | 3.253262000  | N  | 3.221178000  | -3.059987000 | 3.382687000  |
| H                   | 1.001651000  | 4.339631000  | 6.035125000  | N  | 0.684470000  | -3.549571000 | 1.078461000  |
| H                   | 3.529024000  | 3.329888000  | 5.472538000  | N  | -0.716261000 | -3.559755000 | 1.074883000  |
| H                   | -0.458095000 | 4.502954000  | -4.224617000 | N  | -3.268324000 | -3.088188000 | 3.365771000  |
| H                   | 0.463758000  | -4.533768000 | -4.205862000 | N  | -4.367041000 | -1.254165000 | 3.839787000  |
| H                   | 0.529343000  | -5.344419000 | 2.690144000  | N  | -3.222989000 | 3.120686000  | -3.419677000 |
| H                   | 0.559470000  | -5.697414000 | 4.448317000  | N  | -1.267797000 | 4.024427000  | -3.817738000 |
| H                   | -0.552955000 | 5.357015000  | 2.684908000  | N  | 1.240438000  | 4.022602000  | -3.810270000 |
| H                   | -0.591401000 | 5.705068000  | 4.444192000  | N  | 3.196946000  | 3.128491000  | -3.397728000 |
| H                   | -3.576857000 | -3.370079000 | 5.470631000  | N  | -4.163103000 | 0.685904000  | -1.081985000 |
| C                   | 0.377376000  | 0.000506000  | -1.322988000 | N  | 4.143147000  | 0.709711000  | -1.062137000 |
| C                   | -0.413833000 | -0.023228000 | -0.076778000 | N  | 4.298193000  | 1.254831000  | 3.863064000  |
| C                   | 0.485200000  | 0.072032000  | 1.190839000  | N  | 3.199358000  | 3.085287000  | 3.378766000  |
| C                   | 1.059632000  | 0.026726000  | -2.348172000 | N  | 0.656683000  | 3.554545000  | 1.076356000  |
| H                   | -0.147835000 | 0.068147000  | 2.094835000  | N  | -0.744083000 | 3.555436000  | 1.073785000  |
| H                   | 1.080585000  | 0.997451000  | 1.170336000  | N  | -3.290813000 | 3.065810000  | 3.366082000  |
| H                   | 1.182235000  | -0.779382000 | 1.231942000  | N  | -4.375967000 | 1.223636000  | 3.839949000  |
| H                   | 1.649185000  | 0.052462000  | -3.239655000 | C  | -2.048209000 | -3.559722000 | -2.787886000 |
| H                   | -1.005370000 | -0.955281000 | -0.038835000 | C  | -3.113767000 | -3.330257000 | -4.811156000 |
| H                   | -1.130330000 | 0.817789000  | -0.085935000 | C  | -1.882613000 | -3.894903000 | -5.062815000 |
| <u>2-butyne@PPX</u> |              |              |              | C  | 0.023039000  | -4.786948000 | -3.614022000 |
| Au                  | -1.573560000 | -3.490526000 | -0.839113000 | C  | 2.069541000  | -3.527993000 | -2.773296000 |

|   |              |              |              |   |              |              |              |
|---|--------------|--------------|--------------|---|--------------|--------------|--------------|
| C | 3.162563000  | -3.320316000 | -4.785359000 | C | -3.924768000 | 1.997458000  | 2.773894000  |
| C | 1.937594000  | -3.893038000 | -5.047207000 | C | -4.026866000 | 1.820488000  | 5.069682000  |
| C | -4.383715000 | -2.611408000 | -2.685984000 | C | -3.341791000 | 2.977229000  | 4.769108000  |
| C | -4.285117000 | -1.140420000 | -2.379932000 | C | -4.375056000 | -0.014522000 | -3.230070000 |
| C | 4.407971000  | -2.585215000 | -2.652768000 | C | 4.409035000  | 0.012072000  | -3.204041000 |
| C | 4.309759000  | -1.114007000 | -2.354077000 | C | 5.104437000  | 0.019614000  | 3.741558000  |
| C | 3.857853000  | -1.991442000 | 2.795044000  | C | -5.171799000 | -0.018105000 | 3.712041000  |
| C | 3.951565000  | -1.819424000 | 5.092059000  | H | -3.926746000 | -3.089049000 | -5.484860000 |
| C | 3.266735000  | -2.974863000 | 4.786209000  | H | -1.445596000 | -4.233181000 | -5.994323000 |
| C | 2.575445000  | -4.158188000 | 2.605881000  | H | 0.030300000  | -5.620910000 | -4.328985000 |
| C | 1.110391000  | -3.930790000 | 2.328213000  | H | 0.022136000  | -5.180657000 | -2.592090000 |
| C | -0.018149000 | -4.176544000 | 3.144966000  | H | 3.984465000  | -3.084844000 | -5.450204000 |
| C | -1.145450000 | -3.944211000 | 2.323996000  | H | 1.515234000  | -4.245284000 | -5.980331000 |
| C | -2.610035000 | -4.184180000 | 2.595207000  | H | -4.465460000 | -3.174328000 | -1.744952000 |
| C | -3.909395000 | -2.024131000 | 2.773652000  | H | -5.268793000 | -2.824234000 | -3.302699000 |
| C | -4.014761000 | -1.849256000 | 5.069469000  | H | 5.297733000  | -2.804297000 | -3.260299000 |
| C | -3.321144000 | -3.000863000 | 4.768794000  | H | 4.477659000  | -3.143224000 | -1.707777000 |
| C | -2.078071000 | 3.546870000  | -2.788563000 | H | 4.242269000  | -1.411186000 | 6.052218000  |
| C | -3.142848000 | 3.310333000  | -4.811448000 | H | 2.710968000  | -5.088062000 | 3.176623000  |
| C | -1.915116000 | 3.882122000  | -5.063722000 | H | 3.118929000  | -4.246069000 | 1.654385000  |
| C | -0.013534000 | 4.784680000  | -3.616246000 | H | -0.017851000 | -4.524045000 | 4.173143000  |
| C | 2.040512000  | 3.537602000  | -2.775497000 | H | -3.148915000 | -4.280011000 | 1.641950000  |
| C | 3.132513000  | 3.332945000  | -4.788412000 | H | -2.741161000 | -5.113224000 | 3.168415000  |
| C | 1.904117000  | 3.898384000  | -5.049866000 | H | -4.310842000 | -1.440571000 | 6.027800000  |
| C | -4.406907000 | 2.582245000  | -2.685994000 | H | -2.906761000 | -3.760727000 | 5.419558000  |
| C | -4.295661000 | 1.112144000  | -2.379856000 | H | -3.954602000 | 3.063949000  | -5.484759000 |
| C | 4.385156000  | 2.609992000  | -2.655999000 | H | -1.480323000 | 4.222524000  | -5.995501000 |
| C | 4.299411000  | 1.138373000  | -2.355598000 | H | -0.010644000 | 5.618016000  | -4.331974000 |
| C | 3.843927000  | 2.020787000  | 2.792381000  | H | -0.015907000 | 5.179305000  | -2.594666000 |
| C | 3.938501000  | 1.852073000  | 5.089680000  | H | 3.954986000  | 3.101050000  | -5.453805000 |
| C | 3.245137000  | 3.002005000  | 4.782381000  | H | 1.478756000  | 4.246679000  | -5.983108000 |
| C | 2.544961000  | 4.177580000  | 2.600998000  | H | -4.493144000 | 3.144544000  | -1.744988000 |
| C | 1.081159000  | 3.939488000  | 2.325445000  | H | -5.293752000 | 2.787574000  | -3.302697000 |
| C | -0.048348000 | 4.178291000  | 3.142951000  | H | 5.272627000  | 2.835631000  | -3.264494000 |
| C | -1.174759000 | 3.937624000  | 2.323080000  | H | 4.451180000  | 3.169625000  | -1.711702000 |
| C | -2.640834000 | 4.166975000  | 2.595656000  | H | 4.231733000  | 1.446895000  | 6.050365000  |

|                                       |              |              |              |   |              |              |              |
|---------------------------------------|--------------|--------------|--------------|---|--------------|--------------|--------------|
| H                                     | 2.828048000  | 3.764053000  | 5.428834000  | N | 1.926404000  | 3.901811000  | 3.861010000  |
| H                                     | 2.674590000  | 5.109349000  | 3.170046000  | N | 3.633802000  | 2.601352000  | 3.424585000  |
| H                                     | 3.086834000  | 4.267755000  | 1.648777000  | N | -3.776558000 | 1.354304000  | 1.046348000  |
| H                                     | -0.049705000 | 4.526486000  | 4.170894000  | N | 3.944256000  | 0.014793000  | 1.103870000  |
| H                                     | -3.181053000 | 4.259488000  | 1.642842000  | N | 4.347846000  | 0.505898000  | -3.802070000 |
| H                                     | -2.778120000 | 5.094698000  | 3.169527000  | N | 3.690805000  | 2.548149000  | -3.363398000 |
| H                                     | -4.319426000 | 1.409291000  | 6.028020000  | N | 1.361007000  | 3.716109000  | -1.048817000 |
| H                                     | -2.932569000 | 3.739768000  | 5.420016000  | N | -0.017926000 | 3.957335000  | -1.058156000 |
| H                                     | -4.514162000 | -0.015124000 | -4.306012000 | N | -2.574007000 | 3.648880000  | -3.400899000 |
| H                                     | 4.570211000  | 0.012040000  | -4.276893000 | N | -3.872010000 | 1.945830000  | -3.857246000 |
| H                                     | 5.596867000  | 0.020714000  | 2.762941000  | N | -3.706171000 | -2.592277000 | 3.375906000  |
| H                                     | 5.857734000  | 0.022621000  | 4.540610000  | N | -1.992401000 | -3.877940000 | 3.831024000  |
| H                                     | -5.656957000 | -0.019813000 | 2.729954000  | N | 0.468544000  | -4.299469000 | 3.856088000  |
| H                                     | -5.931380000 | -0.020946000 | 4.505219000  | N | 2.522596000  | -3.663396000 | 3.437160000  |
| H                                     | 2.855723000  | -3.739356000 | 5.433672000  | N | -4.042595000 | -0.018687000 | 1.042712000  |
| C                                     | 0.868314000  | 0.005318000  | 0.688150000  | N | 3.709351000  | -1.364552000 | 1.109317000  |
| C                                     | 0.821911000  | 0.003794000  | -0.541203000 | N | 3.925639000  | -1.950479000 | -3.797298000 |
| C                                     | 0.717533000  | -0.000302000 | -2.010110000 | N | 2.619366000  | -3.651853000 | -3.356312000 |
| C                                     | 0.909937000  | 0.006398000  | 2.160219000  | N | 0.026422000  | -3.944646000 | -1.051940000 |
| H                                     | 1.715311000  | -0.030642000 | -2.477752000 | N | -1.352301000 | -3.702462000 | -1.065428000 |
| H                                     | 0.199913000  | 0.911072000  | -2.361108000 | N | -3.644109000 | -2.553058000 | -3.412788000 |
| H                                     | 0.407859000  | 0.902810000  | 2.564324000  | N | -4.292496000 | -0.510672000 | -3.862703000 |
| H                                     | 1.953435000  | 0.008891000  | 2.515788000  | C | -1.388011000 | 4.010305000  | 2.789548000  |
| H                                     | 0.151791000  | -0.886599000 | -2.351248000 | C | -2.475442000 | 3.731442000  | 4.794204000  |
| H                                     | 0.412813000  | -0.892212000 | 2.565409000  | C | -1.194338000 | 4.147951000  | 5.082051000  |
| <u>C<sub>4</sub>H<sub>8</sub>@PPX</u> |              |              |              | C | 0.827680000  | 4.880525000  | 3.701366000  |
| Au                                    | -0.910124000 | 4.006082000  | 0.840404000  | C | 2.633618000  | 3.318826000  | 2.811293000  |
| Au                                    | 2.190978000  | 3.459859000  | 0.859105000  | C | 3.566009000  | 2.721601000  | 4.824626000  |
| Au                                    | 3.990556000  | 0.887736000  | -0.803143000 | C | 2.494957000  | 3.542352000  | 5.101559000  |
| Au                                    | -3.468710000 | 2.193199000  | -0.849200000 | C | -3.803398000 | 3.285018000  | 2.633662000  |
| Au                                    | -2.219152000 | -3.444964000 | 0.827089000  | C | -3.911828000 | 1.811512000  | 2.334498000  |
| Au                                    | 0.890078000  | -3.967934000 | 0.857522000  | C | 4.662742000  | 1.821890000  | 2.674697000  |
| Au                                    | 3.504511000  | -2.218718000 | -0.794337000 | C | 4.249879000  | 0.401245000  | 2.386123000  |
| Au                                    | -4.053512000 | -0.906961000 | -0.855252000 | C | 4.036718000  | 1.365920000  | -2.751389000 |
| N                                     | -2.572518000 | 3.656745000  | 3.392607000  | C | 4.190065000  | 1.160461000  | -5.042329000 |
| N                                     | -0.533263000 | 4.314677000  | 3.846998000  | C | 3.773610000  | 2.443453000  | -4.764535000 |

|   |              |              |              |   |              |              |              |
|---|--------------|--------------|--------------|---|--------------|--------------|--------------|
| C | 3.309520000  | 3.780037000  | -2.613158000 | H | 0.953555000  | 5.657141000  | 4.467821000  |
| C | 1.832605000  | 3.880151000  | -2.327730000 | H | 0.908471000  | 5.327682000  | 2.704848000  |
| C | 0.754524000  | 4.227075000  | -3.174958000 | H | 4.285490000  | 2.258137000  | 5.488170000  |
| C | -0.387787000 | 4.271660000  | -2.342710000 | H | 2.128390000  | 3.918433000  | 6.048817000  |
| C | -1.806755000 | 4.680134000  | -2.643725000 | H | -3.789157000 | 3.848448000  | 1.689699000  |
| C | -3.298348000 | 2.646686000  | -2.798101000 | H | -4.665645000 | 3.619962000  | 3.228321000  |
| C | -3.498667000 | 2.518218000  | -5.091506000 | H | 5.585545000  | 1.839906000  | 3.272305000  |
| C | -2.679444000 | 3.586766000  | -4.802275000 | H | 4.847226000  | 2.347417000  | 1.726844000  |
| C | -2.696231000 | -3.305347000 | 2.772840000  | H | 4.420654000  | 0.690131000  | -5.990225000 |
| C | -3.647198000 | -2.704959000 | 4.777180000  | H | 3.644218000  | 4.642430000  | -3.207561000 |
| C | -2.572457000 | -3.516415000 | 5.065616000  | H | 3.864218000  | 3.770206000  | -1.664012000 |
| C | -0.892606000 | -4.858081000 | 3.685688000  | H | 0.802013000  | 4.454046000  | -4.234887000 |
| C | 1.341311000  | -3.990962000 | 2.814083000  | H | -2.342104000 | 4.861837000  | -1.700757000 |
| C | 2.406456000  | -3.756194000 | 4.836087000  | H | -1.823302000 | 5.603630000  | -3.240282000 |
| C | 1.116321000  | -4.159483000 | 5.101695000  | H | -3.865908000 | 2.155930000  | -6.043829000 |
| C | -4.738713000 | -1.825157000 | 2.618937000  | H | -2.208560000 | 4.308519000  | -5.458029000 |
| C | -4.332054000 | -0.403390000 | 2.327659000  | H | -4.375283000 | -2.244082000 | 5.433062000  |
| C | 3.766231000  | -3.292343000 | 2.697839000  | H | -2.210215000 | -3.885314000 | 6.017291000  |
| C | 3.866219000  | -1.819638000 | 2.395567000  | H | -1.033329000 | -5.636985000 | 4.447273000  |
| C | 3.362567000  | -2.668480000 | -2.744963000 | H | -0.958730000 | -5.301973000 | 2.686622000  |
| C | 3.529848000  | -2.494777000 | -5.037424000 | H | 3.236013000  | -3.569847000 | 5.506806000  |
| C | 2.705305000  | -3.562077000 | -4.758040000 | H | 0.635732000  | -4.388937000 | 6.044753000  |
| C | 1.841380000  | -4.680761000 | -2.606363000 | H | -4.913967000 | -2.356120000 | 1.672259000  |
| C | 0.416884000  | -4.272059000 | -2.327770000 | H | -5.664046000 | -1.849639000 | 3.212457000  |
| C | -0.713449000 | -4.239612000 | -3.176302000 | H | 4.619221000  | -3.620393000 | 3.309034000  |
| C | -1.803883000 | -3.883672000 | -2.349085000 | H | 3.769479000  | -3.859107000 | 1.755747000  |
| C | -3.275753000 | -3.787269000 | -2.658535000 | H | 3.888326000  | -2.118102000 | -5.987445000 |
| C | -4.009840000 | -1.374176000 | -2.806657000 | H | 2.220680000  | -4.267714000 | -5.421251000 |
| C | -4.098605000 | -1.160030000 | -5.099841000 | H | 1.866374000  | -5.606827000 | -3.198640000 |
| C | -3.687527000 | -2.443272000 | -4.814632000 | H | 2.363713000  | -4.856702000 | -1.655190000 |
| C | -4.258561000 | 0.727353000  | 3.173769000  | H | -0.745911000 | -4.482136000 | -4.233391000 |
| C | 4.204070000  | -0.731019000 | 3.232144000  | H | -3.847644000 | -3.781127000 | -1.719576000 |
| C | 4.908964000  | -0.854538000 | -3.645022000 | H | -3.599394000 | -4.647963000 | -3.261397000 |
| C | -4.856955000 | 0.849795000  | -3.717479000 | H | -4.299469000 | -0.685394000 | -6.052352000 |
| H | -3.311079000 | 3.525377000  | 5.451455000  | H | -3.466204000 | -3.272803000 | -5.474605000 |
| H | -0.728480000 | 4.369506000  | 6.034315000  | H | -4.470682000 | 0.764700000  | 4.237219000  |

|                                           |              |              |              |   |              |              |              |
|-------------------------------------------|--------------|--------------|--------------|---|--------------|--------------|--------------|
| H                                         | 4.426890000  | -0.765367000 | 4.293481000  | N | -4.095314000 | -0.740940000 | -1.100672000 |
| H                                         | 5.353904000  | -0.929929000 | -2.647047000 | N | -3.123042000 | -3.164148000 | -3.431206000 |
| H                                         | 5.685806000  | -0.989303000 | -4.409861000 | N | -1.161711000 | -4.056821000 | -3.819240000 |
| H                                         | -5.320287000 | 0.927123000  | -2.728086000 | N | 3.255742000  | -3.053774000 | 3.406878000  |
| H                                         | -5.621061000 | 0.983099000  | -4.495216000 | N | 4.305734000  | -1.192926000 | 3.885494000  |
| H                                         | 3.575031000  | 3.276346000  | -5.427514000 | N | 4.273614000  | 1.287226000  | 3.887569000  |
| H                                         | -0.807226000 | 0.320185000  | 2.100353000  | N | 3.173793000  | 3.119979000  | 3.412510000  |
| C                                         | -0.595792000 | -0.294085000 | 1.208163000  | N | 0.746967000  | -3.563634000 | 1.090912000  |
| C                                         | 0.407238000  | 0.413261000  | 0.260441000  | N | 0.646845000  | 3.561500000  | 1.100408000  |
| C                                         | 0.632538000  | -0.393151000 | -1.005384000 | N | 1.231679000  | 4.078063000  | -3.783236000 |
| C                                         | 0.821065000  | 0.130787000  | -2.241034000 | N | 3.187284000  | 3.183346000  | -3.370040000 |
| H                                         | -0.193054000 | -1.269913000 | 1.536851000  | N | 4.089065000  | 0.753404000  | -1.038295000 |
| H                                         | -1.546341000 | -0.480998000 | 0.686161000  | N | 4.108756000  | -0.644204000 | -1.037690000 |
| H                                         | 1.375443000  | 0.544970000  | 0.780971000  | N | 3.279146000  | -3.096198000 | -3.373352000 |
| H                                         | 0.043962000  | 1.419465000  | -0.000494000 | N | 1.344849000  | -4.031432000 | -3.795714000 |
| H                                         | 0.649529000  | -1.481000000 | -0.873774000 | C | -3.865946000 | -2.061025000 | 2.754469000  |
| H                                         | 0.800817000  | 1.211564000  | -2.408211000 | C | -3.292150000 | -3.047586000 | 4.748257000  |
| H                                         | 1.005290000  | -0.509765000 | -3.108552000 | C | -3.993444000 | -1.900816000 | 5.049604000  |
| <u>(E)-C<sub>4</sub>H<sub>8</sub>@PPX</u> |              |              |              | C | -5.152521000 | -0.071471000 | 3.691113000  |
| Au                                        | -3.987552000 | -1.596166000 | 0.806647000  | C | -3.923510000 | 1.957796000  | 2.763354000  |
| Au                                        | -4.036218000 | 1.503118000  | 0.812577000  | C | -3.369945000 | 2.947026000  | 4.761595000  |
| Au                                        | -1.592465000 | 3.434581000  | -0.835396000 | C | -4.039874000 | 1.780303000  | 5.057766000  |
| Au                                        | -1.491220000 | -3.459412000 | -0.848211000 | C | -2.557518000 | -4.214525000 | 2.573238000  |
| Au                                        | 3.981398000  | -1.499284000 | 0.869930000  | C | -1.091843000 | -3.967728000 | 2.316341000  |
| Au                                        | 3.953742000  | 1.602094000  | 0.871820000  | C | -2.668141000 | 4.143059000  | 2.591220000  |
| Au                                        | 1.526181000  | 3.501292000  | -0.807863000 | C | -1.198213000 | 3.928731000  | 2.329212000  |
| Au                                        | 1.626313000  | -3.478630000 | -0.814875000 | C | -2.072341000 | 3.536208000  | -2.782425000 |
| N                                         | -3.226941000 | -3.126332000 | 3.345267000  | C | -1.928402000 | 3.938170000  | -5.048794000 |
| N                                         | -4.337327000 | -1.300029000 | 3.820343000  | C | -3.147425000 | 3.345035000  | -4.805650000 |
| N                                         | -4.371238000 | 1.178117000  | 3.825758000  | C | -4.393158000 | 2.554006000  | -2.693386000 |
| N                                         | -3.310879000 | 3.035894000  | 3.358934000  | C | -4.259994000 | 1.084801000  | -2.393844000 |
| N                                         | -0.652521000 | -3.571644000 | 1.075239000  | C | -4.330224000 | -0.041181000 | -3.245992000 |
| N                                         | -0.753356000 | 3.540830000  | 1.087426000  | C | -4.225916000 | -1.167714000 | -2.398353000 |
| N                                         | -1.275354000 | 4.053413000  | -3.802788000 | C | -4.314884000 | -2.639112000 | -2.702545000 |
| N                                         | -3.216397000 | 3.115571000  | -3.419211000 | C | -1.968573000 | -3.559436000 | -2.796593000 |
| N                                         | -4.116488000 | 0.657293000  | -1.098164000 | C | -1.818913000 | -3.953770000 | -5.064161000 |

|   |              |              |              |   |              |              |              |
|---|--------------|--------------|--------------|---|--------------|--------------|--------------|
| C | -3.050800000 | -3.389234000 | -4.818233000 | H | -3.202677000 | 4.230209000  | 1.634590000  |
| C | 3.854551000  | -1.964406000 | 2.817820000  | H | -1.503085000 | 4.309676000  | -5.973050000 |
| C | 3.325437000  | -2.979583000 | 4.809814000  | H | -5.281319000 | 2.747357000  | -3.311920000 |
| C | 3.988539000  | -1.810801000 | 5.113419000  | H | -4.492395000 | 3.108923000  | -1.749260000 |
| C | 5.087271000  | 0.057584000  | 3.758429000  | H | -4.473023000 | -0.041230000 | -4.321371000 |
| C | 3.809349000  | 2.052829000  | 2.821503000  | H | -4.396490000 | -3.199842000 | -1.760163000 |
| C | 3.234404000  | 3.038410000  | 4.815417000  | H | -5.197526000 | -2.857042000 | -3.320834000 |
| C | 3.928949000  | 1.887435000  | 5.116814000  | H | -1.386289000 | -4.313342000 | -5.989766000 |
| C | 2.627244000  | -4.164459000 | 2.631759000  | H | -3.869924000 | -3.169074000 | -5.491677000 |
| C | 1.162961000  | -3.950935000 | 2.342288000  | H | 2.941697000  | -3.757611000 | 5.457894000  |
| C | 2.514895000  | 4.213667000  | 2.638948000  | H | 4.284523000  | -1.402524000 | 6.071957000  |
| C | 1.056468000  | 3.960961000  | 2.350474000  | H | 5.847892000  | 0.066516000  | 4.550484000  |
| C | 2.033591000  | 3.601028000  | -2.748253000 | H | 5.571852000  | 0.064808000  | 2.776036000  |
| C | 1.890308000  | 3.942726000  | -5.023734000 | H | 2.822872000  | 3.800460000  | 5.465409000  |
| C | 3.118602000  | 3.376503000  | -4.762071000 | H | 4.228716000  | 1.481259000  | 6.075057000  |
| C | 4.370067000  | 2.655747000  | -2.626870000 | H | 3.178241000  | -4.251921000 | 1.684472000  |
| C | 4.277346000  | 1.183156000  | -2.327862000 | H | 2.769753000  | -5.088975000 | 3.209180000  |
| C | 4.420450000  | 0.058350000  | -3.171828000 | H | 2.631431000  | 5.141098000  | 3.217591000  |
| C | 4.310247000  | -1.069332000 | -2.326743000 | H | 3.063481000  | 4.318110000  | 1.691946000  |
| C | 4.445025000  | -2.538808000 | -2.625737000 | H | 1.462004000  | 4.283449000  | -5.958366000 |
| C | 2.136503000  | -3.548963000 | -2.755794000 | H | 3.937939000  | 3.137213000  | -5.428654000 |
| C | 1.998610000  | -3.865610000 | -5.035104000 | H | 5.260799000  | 2.875502000  | -3.232616000 |
| C | 3.213469000  | -3.273704000 | -4.767624000 | H | 4.437342000  | 3.214525000  | -1.682251000 |
| C | 0.028181000  | -4.204409000 | 3.146541000  | H | 4.609928000  | 0.060595000  | -4.240018000 |
| C | -0.081970000 | 4.190540000  | 3.156533000  | H | 4.524547000  | -3.096154000 | -1.681293000 |
| C | -0.030968000 | 4.825779000  | -3.589871000 | H | 5.343475000  | -2.733216000 | -3.228763000 |
| C | 0.097727000  | -4.805877000 | -3.610216000 | H | 1.577433000  | -4.205096000 | -5.973422000 |
| H | -2.879588000 | -3.809406000 | 5.397845000  | H | 4.026107000  | -3.006703000 | -5.431877000 |
| H | -4.299612000 | -1.498905000 | 6.007604000  | H | 0.019185000  | -4.557461000 | 4.172748000  |
| H | -5.916451000 | -0.083815000 | 4.479994000  | H | -0.096690000 | 4.545069000  | 4.182184000  |
| H | -5.632330000 | -0.075684000 | 2.706312000  | H | -0.042203000 | 5.213036000  | -2.565339000 |
| H | -2.975623000 | 3.715395000  | 5.414791000  | H | -0.034162000 | 5.663957000  | -4.299909000 |
| H | -4.332601000 | 1.364645000  | 6.014106000  | H | 0.092669000  | -5.201482000 | -2.588818000 |
| H | -3.087377000 | -4.307689000 | 1.614509000  | H | 0.111807000  | -5.638200000 | -4.326962000 |
| H | -2.688937000 | -5.147138000 | 3.140394000  | H | -3.960459000 | 3.107741000  | -5.480643000 |
| H | -2.817660000 | 5.069391000  | 3.164091000  | H | 1.309669000  | 0.888068000  | -2.349351000 |



|                                           |              |              |              |   |              |              |              |
|-------------------------------------------|--------------|--------------|--------------|---|--------------|--------------|--------------|
| C                                         | 0.813933000  | -0.036863000 | -2.006070000 | N | -4.258499000 | -0.238307000 | -1.036782000 |
| C                                         | 0.606374000  | -0.006093000 | -0.505488000 | N | 3.786720000  | 1.559418000  | -1.068842000 |
| C                                         | -0.598455000 | -0.077676000 | 0.115022000  | N | 3.870525000  | 2.219967000  | 3.845498000  |
| C                                         | -0.774223000 | -0.037437000 | 1.619575000  | N | 2.365128000  | 3.733590000  | 3.355287000  |
| H                                         | -0.147413000 | -0.146082000 | -2.536857000 | N | -0.232311000 | 3.611218000  | 1.070291000  |
| H                                         | 1.474345000  | -0.872901000 | -2.291917000 | N | -1.599309000 | 3.304902000  | 1.074921000  |
| H                                         | 1.512716000  | 0.083767000  | 0.106569000  | N | -3.945613000 | 2.299383000  | 3.389246000  |
| H                                         | -1.513017000 | -0.176373000 | -0.482356000 | N | -4.515078000 | 0.244670000  | 3.885553000  |
| H                                         | 0.204635000  | 0.012329000  | 2.126828000  | C | -1.085054000 | -3.856191000 | -2.741387000 |
| H                                         | -1.311914000 | -0.936338000 | 1.969221000  | C | -2.202652000 | -3.900110000 | -4.750237000 |
| H                                         | -1.367766000 | 0.845665000  | 1.916161000  | C | -0.883525000 | -4.194360000 | -5.014273000 |
| <u>(Z)-C<sub>4</sub>H<sub>8</sub>@PPX</u> |              |              |              | C | 1.177590000  | -4.667756000 | -3.583478000 |
| Au                                        | -0.608751000 | -3.654467000 | -0.800869000 | C | 2.944751000  | -3.039392000 | -2.752670000 |
| Au                                        | 2.466799000  | -3.075734000 | -0.803465000 | C | 3.913583000  | -2.548080000 | -4.777262000 |
| Au                                        | 4.324557000  | -0.609267000 | 0.863197000  | C | 2.842498000  | -3.376737000 | -5.030194000 |
| Au                                        | -3.462039000 | -2.347574000 | 0.874078000  | C | -3.576922000 | -3.480537000 | -2.613513000 |
| Au                                        | -2.421943000 | 2.989277000  | -0.840571000 | C | -3.866270000 | -2.033024000 | -2.322969000 |
| Au                                        | 0.624529000  | 3.690990000  | -0.842991000 | C | 4.967472000  | -1.540998000 | -2.649855000 |
| Au                                        | 3.445383000  | 2.376621000  | 0.831518000  | C | 4.466538000  | -0.153973000 | -2.348056000 |
| Au                                        | -4.376964000 | 0.625581000  | 0.866072000  | C | 4.301728000  | -1.053879000 | 2.818004000  |
| N                                         | -2.304354000 | -3.705598000 | -3.360021000 | C | 4.332204000  | -0.825291000 | 5.110450000  |
| N                                         | -0.203867000 | -4.168524000 | -3.776936000 | C | 3.978964000  | -2.125725000 | 4.823657000  |
| N                                         | 2.252586000  | -3.672106000 | -3.782438000 | C | 3.606839000  | -3.477424000 | 2.661714000  |
| N                                         | 3.959841000  | -2.361301000 | -3.383664000 | C | 2.131394000  | -3.583762000 | 2.367606000  |
| N                                         | -3.862078000 | -1.578788000 | -1.028973000 | C | 1.071716000  | -4.035236000 | 3.186624000  |
| N                                         | 4.178443000  | 0.216024000  | -1.058184000 | C | -0.077327000 | -4.040678000 | 2.361973000  |
| N                                         | 4.522532000  | -0.174142000 | 3.873600000  | C | -1.460831000 | -4.575280000 | 2.632446000  |
| N                                         | 3.966549000  | -2.243121000 | 3.421841000  | C | -3.205863000 | -2.758358000 | 2.820538000  |
| N                                         | 1.642081000  | -3.316634000 | 1.110666000  | C | -3.380812000 | -2.656709000 | 5.116981000  |
| N                                         | 0.269563000  | -3.596209000 | 1.108612000  | C | -2.427515000 | -3.602707000 | 4.811325000  |
| N                                         | -2.338185000 | -3.649879000 | 3.408076000  | C | -2.936900000 | 2.966730000  | -2.781771000 |
| N                                         | -3.851851000 | -2.142991000 | 3.890325000  | C | -3.978353000 | 2.543599000  | -4.787703000 |
| N                                         | -3.981093000 | 2.318905000  | -3.398814000 | C | -2.906172000 | 3.366190000  | -5.053320000 |
| N                                         | -2.272230000 | 3.621083000  | -3.817841000 | C | -1.198825000 | 4.620233000  | -3.628772000 |
| N                                         | 0.184298000  | 4.127204000  | -3.825141000 | C | 1.077355000  | 3.847696000  | -2.791845000 |
| N                                         | 2.289593000  | 3.677585000  | -3.418411000 | C | 2.172294000  | 3.829717000  | -4.812383000 |

|   |              |              |              |   |              |              |              |
|---|--------------|--------------|--------------|---|--------------|--------------|--------------|
| C | 0.849708000  | 4.116079000  | -5.070033000 | H | -3.778040000 | -2.347826000 | 6.076108000  |
| C | -4.991926000 | 1.513496000  | -2.654261000 | H | -1.850755000 | -4.252224000 | 5.457846000  |
| C | -4.499629000 | 0.127639000  | -2.336723000 | H | -4.736417000 | 2.141346000  | -5.448381000 |
| C | 3.565550000  | 3.454968000  | -2.676637000 | H | -2.576774000 | 3.807137000  | -5.986165000 |
| C | 3.839718000  | 2.008625000  | -2.364488000 | H | -1.367536000 | 5.431346000  | -4.349990000 |
| C | 3.223263000  | 2.828951000  | 2.773220000  | H | -1.276690000 | 5.013359000  | -2.609413000 |
| C | 3.411048000  | 2.751237000  | 5.069064000  | H | 3.019612000  | 3.760697000  | -5.483363000 |
| C | 2.462835000  | 3.700981000  | 4.758507000  | H | 0.353204000  | 4.342960000  | -6.005523000 |
| C | 1.481866000  | 4.650846000  | 2.574370000  | H | -5.216060000 | 2.044487000  | -1.717664000 |
| C | 0.101501000  | 4.104261000  | 2.310322000  | H | -5.902681000 | 1.478364000  | -3.268885000 |
| C | -1.052118000 | 4.111615000  | 3.126797000  | H | 4.375425000  | 3.878073000  | -3.288258000 |
| C | -2.100021000 | 3.614454000  | 2.317471000  | H | 3.500167000  | 4.022678000  | -1.737337000 |
| C | -3.577907000 | 3.514402000  | 2.603411000  | H | 3.811835000  | 2.450602000  | 6.029338000  |
| C | -4.306489000 | 1.104719000  | 2.811498000  | H | 1.894548000  | 4.361636000  | 5.401283000  |
| C | -4.293987000 | 0.913335000  | 5.107520000  | H | 1.412522000  | 5.593041000  | 3.136678000  |
| C | -3.932404000 | 2.204969000  | 4.792685000  | H | 1.986450000  | 4.848790000  | 1.618030000  |
| C | -4.261014000 | -0.980654000 | -3.180338000 | H | -1.128737000 | 4.471940000  | 4.147637000  |
| C | 4.261778000  | 0.952213000  | -3.202776000 | H | -4.133699000 | 3.474340000  | 1.655652000  |
| C | 4.965355000  | 1.229904000  | 3.726703000  | H | -3.914883000 | 4.391579000  | 3.173949000  |
| C | -4.955199000 | -1.162700000 | 3.769512000  | H | -4.443973000 | 0.443387000  | 6.071670000  |
| H | -3.057749000 | -3.851423000 | -5.413089000 | H | -3.709160000 | 3.047911000  | 5.434688000  |
| H | -0.397853000 | -4.450447000 | -5.947918000 | H | -4.393353000 | -1.025039000 | -4.256137000 |
| H | 1.338885000  | -5.483071000 | -4.301580000 | H | 4.430079000  | 0.992582000  | -4.273715000 |
| H | 1.258213000  | -5.055198000 | -2.562142000 | H | 5.430485000  | 1.344545000  | 2.741388000  |
| H | 4.645441000  | -2.120157000 | -5.451191000 | H | 5.701393000  | 1.441421000  | 4.513983000  |
| H | 2.488269000  | -3.797092000 | -5.963396000 | H | -5.433902000 | -1.297452000 | 2.793299000  |
| H | -3.501366000 | -4.030991000 | -1.664829000 | H | -5.678314000 | -1.364448000 | 4.571127000  |
| H | -4.385886000 | -3.923366000 | -3.212748000 | H | 3.777842000  | -2.960397000 | 5.483563000  |
| H | 5.876651000  | -1.505269000 | -3.266643000 | C | -0.611582000 | 0.007542000  | 0.120878000  |
| H | 5.196799000  | -2.060751000 | -1.708483000 | C | -0.671300000 | -0.139416000 | -1.229105000 |
| H | 4.496047000  | -0.338586000 | 6.063989000  | H | -1.560507000 | 0.112883000  | 0.658764000  |
| H | 3.941650000  | -4.339787000 | 3.255498000  | H | -1.661348000 | -0.137265000 | -1.695527000 |
| H | 4.169722000  | -3.458257000 | 1.717589000  | C | 0.643001000  | 0.061148000  | 0.969362000  |
| H | 1.137045000  | -4.360410000 | 4.219945000  | H | 0.704759000  | 1.027475000  | 1.502814000  |
| H | -1.966816000 | -4.778586000 | 1.677935000  | H | 0.640566000  | -0.746151000 | 1.723251000  |
| H | -1.395380000 | -5.514271000 | 3.200974000  | H | 1.555570000  | -0.045792000 | 0.366757000  |

|                        |              |              |              |   |              |              |              |
|------------------------|--------------|--------------|--------------|---|--------------|--------------|--------------|
| C                      | 0.503824000  | -0.309805000 | -2.176602000 | N | 1.257735000  | -3.957678000 | -3.780638000 |
| H                      | 1.473659000  | -0.307734000 | -1.658022000 | C | -3.932387000 | -2.012530000 | 2.794374000  |
| H                      | 0.416587000  | -1.270970000 | -2.716749000 | C | -3.233686000 | -2.949287000 | 4.773509000  |
| H                      | 0.514064000  | 0.496606000  | -2.934069000 | C | -3.938573000 | -1.809672000 | 5.091039000  |
| <u>Isobutylene@PPX</u> |              |              |              | C | -5.167836000 | -0.002817000 | 3.769507000  |
| Au                     | -4.192085000 | -1.581489000 | 0.850465000  | C | -3.934999000 | 2.008548000  | 2.794442000  |
| Au                     | -4.194391000 | 1.577317000  | 0.850492000  | C | -3.237426000 | 2.946033000  | 4.773642000  |
| Au                     | -1.574924000 | 3.381330000  | -0.811236000 | C | -3.940939000 | 1.805559000  | 5.091109000  |
| Au                     | -1.570713000 | -3.381184000 | -0.811493000 | C | -2.585237000 | -4.145608000 | 2.592776000  |
| Au                     | 4.121156000  | -1.572321000 | 0.850061000  | C | -1.114756000 | -3.921313000 | 2.335033000  |
| Au                     | 4.118681000  | 1.575495000  | 0.850379000  | C | -2.590158000 | 4.143186000  | 2.593094000  |
| Au                     | 1.610863000  | 3.492354000  | -0.796812000 | C | -1.119440000 | 3.920299000  | 2.335406000  |
| Au                     | 1.614821000  | -3.490582000 | -0.797177000 | C | -2.075719000 | 3.476111000  | -2.754536000 |
| N                      | -3.240020000 | -3.053535000 | 3.370807000  | C | -1.921623000 | 3.836886000  | -5.028815000 |
| N                      | -4.357562000 | -1.238007000 | 3.871562000  | C | -3.159941000 | 3.291348000  | -4.774606000 |
| N                      | -4.359207000 | 1.233448000  | 3.871589000  | C | -4.440715000 | 2.595720000  | -2.653669000 |
| N                      | -3.243876000 | 3.050356000  | 3.370953000  | C | -4.387569000 | 1.123182000  | -2.344831000 |
| N                      | -0.678408000 | -3.528519000 | 1.092069000  | C | -4.390008000 | -0.002476000 | -3.200137000 |
| N                      | -0.682744000 | 3.528482000  | 1.092270000  | C | -4.386429000 | -1.128007000 | -2.344674000 |
| N                      | -1.261730000 | 3.949790000  | -3.785404000 | C | -4.438223000 | -2.600620000 | -2.653286000 |
| N                      | -3.235576000 | 3.086677000  | -3.383965000 | C | -2.071942000 | -3.477594000 | -2.754620000 |
| N                      | -4.388336000 | 0.697016000  | -1.041597000 | C | -1.918881000 | -3.840915000 | -5.028589000 |
| N                      | -4.387564000 | -0.701629000 | -1.041512000 | C | -3.157788000 | -3.296816000 | -4.774200000 |
| N                      | -3.232770000 | -3.090568000 | -3.383758000 | C | 3.919812000  | -2.017406000 | 2.798224000  |
| N                      | -1.257981000 | -3.951382000 | -3.785482000 | C | 3.281102000  | -2.968606000 | 4.790541000  |
| N                      | 3.259482000  | -3.071941000 | 3.387768000  | C | 3.972532000  | -1.817077000 | 5.094488000  |
| N                      | 4.355118000  | -1.236856000 | 3.867051000  | C | 5.157928000  | 0.002075000  | 3.749473000  |
| N                      | 4.353502000  | 1.239955000  | 3.867317000  | C | 3.917041000  | 2.020026000  | 2.798621000  |
| N                      | 3.255584000  | 3.073762000  | 3.388327000  | C | 3.277645000  | 2.970411000  | 4.791097000  |
| N                      | 0.722536000  | -3.550800000 | 1.098144000  | C | 3.970508000  | 1.819692000  | 5.094855000  |
| N                      | 0.718197000  | 3.551446000  | 1.098455000  | C | 2.607859000  | -4.177524000 | 2.623328000  |
| N                      | 1.253933000  | 3.959440000  | -3.780300000 | C | 1.141604000  | -3.947368000 | 2.346811000  |
| N                      | 3.230439000  | 3.101403000  | -3.380882000 | C | 2.602948000  | 4.178894000  | 2.624080000  |
| N                      | 4.263318000  | 0.701194000  | -1.046842000 | C | 1.136900000  | 3.947626000  | 2.347382000  |
| N                      | 4.264075000  | -0.697191000 | -1.046971000 | C | 2.088207000  | 3.533534000  | -2.747722000 |
| N                      | 3.233543000  | -3.097863000 | -3.381495000 | C | 1.883838000  | 3.780436000  | -5.030213000 |

|   |              |              |              |                                        |              |              |              |
|---|--------------|--------------|--------------|----------------------------------------|--------------|--------------|--------------|
| C | 3.124198000  | 3.236985000  | -4.777503000 | H                                      | 4.247467000  | 1.402522000  | 6.055147000  |
| C | 4.434577000  | 2.602099000  | -2.651975000 | H                                      | 3.150915000  | -4.277702000 | 1.672757000  |
| C | 4.369776000  | 1.128487000  | -2.346438000 | H                                      | 2.743109000  | -5.101149000 | 3.204094000  |
| C | 4.441953000  | 0.002328000  | -3.197740000 | H                                      | 2.737376000  | 5.102522000  | 3.205027000  |
| C | 4.370969000  | -1.124093000 | -2.346665000 | H                                      | 3.145954000  | 4.279766000  | 1.673555000  |
| C | 4.437331000  | -2.597532000 | -2.652719000 | H                                      | 1.430037000  | 4.080479000  | -5.966727000 |
| C | 2.091971000  | -3.531530000 | -2.748161000 | H                                      | 3.929785000  | 2.979986000  | -5.454260000 |
| C | 1.886967000  | -3.777311000 | -5.030685000 | H                                      | 5.312168000  | 2.836994000  | -3.271428000 |
| C | 3.126871000  | -3.232730000 | -4.778145000 | H                                      | 4.504093000  | 3.166026000  | -1.710605000 |
| C | 0.007285000  | -4.183383000 | 3.157053000  | H                                      | 4.561471000  | 0.002520000  | -4.275939000 |
| C | 0.002369000  | 4.182596000  | 3.157656000  | H                                      | 4.507730000  | -3.161758000 | -1.711595000 |
| C | -0.007695000 | 4.712513000  | -3.586654000 | H                                      | 5.315023000  | -2.831239000 | -3.272480000 |
| C | -0.002905000 | -4.712366000 | -3.586736000 | H                                      | 1.433112000  | -4.077241000 | -5.967206000 |
| H | -2.774469000 | -3.691781000 | 5.413971000  | H                                      | 3.931912000  | -2.974510000 | -5.455084000 |
| H | -4.201698000 | -1.395770000 | 6.056603000  | H                                      | -0.001522000 | -4.540692000 | 4.181849000  |
| H | -5.898926000 | -0.003303000 | 4.589011000  | H                                      | -0.006704000 | 4.539384000  | 4.182629000  |
| H | -5.687024000 | -0.003161000 | 2.805107000  | H                                      | -0.011107000 | 5.111006000  | -2.566601000 |
| H | -2.779093000 | 3.689034000  | 5.414144000  | H                                      | -0.010002000 | 5.544018000  | -4.304793000 |
| H | -4.203594000 | 1.391272000  | 6.056635000  | H                                      | -0.005640000 | -5.110695000 | -2.566618000 |
| H | -3.116732000 | -4.224630000 | 1.633731000  | H                                      | -0.004203000 | -5.544013000 | -4.304712000 |
| H | -2.730288000 | -5.080694000 | 3.152971000  | H                                      | -3.982837000 | 3.073533000  | -5.444292000 |
| H | -2.736175000 | 5.078040000  | 3.153418000  | C                                      | -1.290432000 | 0.001140000  | -0.808281000 |
| H | -3.121698000 | 4.221780000  | 1.634039000  | C                                      | 0.062058000  | 0.000437000  | -0.701216000 |
| H | -1.486641000 | 4.180137000  | -5.959478000 | H                                      | -1.797255000 | 0.003144000  | -1.774621000 |
| H | -5.316212000 | 2.836124000  | -3.274556000 | H                                      | -1.912091000 | 0.000869000  | 0.085625000  |
| H | -4.510669000 | 3.162079000  | -1.713703000 | C                                      | 0.739068000  | -0.000401000 | 0.656842000  |
| H | -4.424361000 | -0.002571000 | -4.284410000 | C                                      | 0.973480000  | 0.001075000  | -1.915393000 |
| H | -4.507478000 | -3.166858000 | -1.713193000 | H                                      | 1.380266000  | -0.891422000 | 0.766086000  |
| H | -5.313616000 | -2.841949000 | -3.273956000 | H                                      | 1.377424000  | 0.892450000  | 0.768218000  |
| H | -1.484037000 | -4.184699000 | -5.959119000 | H                                      | -0.002178000 | -0.002538000 | 1.472115000  |
| H | -3.981434000 | -3.080946000 | -5.443594000 | H                                      | 1.638476000  | 0.878625000  | -1.901807000 |
| H | 2.848251000  | -3.719493000 | 5.439609000  | H                                      | 1.637824000  | -0.876996000 | -1.903417000 |
| H | 4.248780000  | -1.399600000 | 6.054852000  | H                                      | 0.398623000  | 0.002173000  | -2.855729000 |
| H | 5.905350000  | 0.002485000  | 4.554165000  | <u>C<sub>4</sub>H<sub>10</sub>@PPX</u> |              |              |              |
| H | 5.658587000  | 0.002512000  | 2.775208000  | Au                                     | 4.084966000  | -1.341087000 | -0.805159000 |
| H | 2.844062000  | 3.720770000  | 5.440282000  | Au                                     | 3.884161000  | 1.786449000  | -0.804955000 |

|    |              |              |              |   |              |              |              |
|----|--------------|--------------|--------------|---|--------------|--------------|--------------|
| Au | 1.334167000  | 3.661154000  | 0.858769000  | C | 3.846037000  | 2.061269000  | -5.048445000 |
| Au | 1.796342000  | -3.497352000 | 0.860041000  | C | 2.876552000  | -4.069299000 | -2.586891000 |
| Au | -3.867085000 | -1.786443000 | -0.866008000 | C | 1.398477000  | -3.951418000 | -2.310749000 |
| Au | -4.070762000 | 1.333217000  | -0.874113000 | C | 2.357345000  | 4.351446000  | -2.582514000 |
| Au | -1.808791000 | 3.483174000  | 0.827631000  | C | 0.900805000  | 4.064502000  | -2.314262000 |
| Au | -1.346503000 | -3.635206000 | 0.837429000  | C | 1.792696000  | 3.697085000  | 2.812257000  |
| N  | 3.434978000  | -2.915425000 | -3.351078000 | C | 1.594540000  | 3.946493000  | 5.094938000  |
| N  | 4.372355000  | -0.992315000 | -3.816800000 | C | 2.848359000  | 3.437940000  | 4.836345000  |
| N  | 4.223196000  | 1.485595000  | -3.816894000 | C | 4.163201000  | 2.835525000  | 2.703305000  |
| N  | 3.052188000  | 3.275883000  | -3.348830000 | C | 4.146710000  | 1.361346000  | 2.396404000  |
| N  | 0.946464000  | -3.635476000 | -1.052450000 | C | 4.316097000  | 0.243902000  | 3.245479000  |
| N  | 0.479336000  | 3.708581000  | -1.055796000 | C | 4.298598000  | -0.885897000 | 2.396153000  |
| N  | 0.952611000  | 4.102932000  | 3.847890000  | C | 4.510447000  | -2.345002000 | 2.703338000  |
| N  | 2.949619000  | 3.299448000  | 3.439875000  | C | 2.259832000  | -3.482896000 | 2.812714000  |
| N  | 4.029940000  | 0.925835000  | 1.100036000  | C | 2.094730000  | -3.756967000 | 5.095417000  |
| N  | 4.123553000  | -0.469760000 | 1.099856000  | C | 3.284003000  | -3.112031000 | 4.835758000  |
| N  | 3.366349000  | -2.960285000 | 3.439580000  | C | -3.672770000 | -2.237561000 | -2.811625000 |
| N  | 1.471617000  | -3.980143000 | 3.849101000  | C | -3.032236000 | -3.198225000 | -4.798409000 |
| N  | -2.988245000 | -3.278801000 | -3.394663000 | C | -3.766677000 | -2.075173000 | -5.108985000 |
| N  | -4.151698000 | -1.489638000 | -3.884583000 | C | -5.026230000 | -0.300712000 | -3.769244000 |
| N  | -4.308648000 | 0.988160000  | -3.890875000 | C | -3.927563000 | 1.794741000  | -2.821461000 |
| N  | -3.376530000 | 2.909986000  | -3.409403000 | C | -3.408332000 | 2.817583000  | -4.812812000 |
| N  | -0.452923000 | -3.702510000 | -1.061802000 | C | -3.997150000 | 1.610375000  | -5.118039000 |
| N  | -0.919542000 | 3.629639000  | -1.069823000 | C | -2.305838000 | -4.352537000 | -2.615426000 |
| N  | -1.549713000 | 3.967512000  | 3.821430000  | C | -0.854048000 | -4.064996000 | -2.325404000 |
| N  | -3.436703000 | 2.948829000  | 3.374341000  | C | -2.824679000 | 4.060513000  | -2.635579000 |
| N  | -4.181642000 | 0.465222000  | 1.026835000  | C | -1.351033000 | 3.938636000  | -2.337686000 |
| N  | -4.082628000 | -0.929254000 | 1.031498000  | C | -2.317748000 | 3.471577000  | 2.769252000  |
| N  | -3.019871000 | -3.292119000 | 3.387872000  | C | -2.195966000 | 3.741405000  | 5.055528000  |
| N  | -1.031563000 | -4.098613000 | 3.829610000  | C | -3.380090000 | 3.097282000  | 4.772418000  |
| C  | 3.986785000  | -1.805684000 | -2.754409000 | C | -4.574184000 | 2.346431000  | 2.617499000  |
| C  | 3.468979000  | -2.812581000 | -4.753740000 | C | -4.375626000 | 0.884193000  | 2.319033000  |
| C  | 4.061169000  | -1.604677000 | -5.049021000 | C | -4.403207000 | -0.243917000 | 3.170266000  |
| C  | 5.092519000  | 0.294437000  | -3.685630000 | C | -4.216285000 | -1.362569000 | 2.326297000  |
| C  | 3.734758000  | 2.240547000  | -2.753530000 | C | -4.224109000 | -2.836490000 | 2.631758000  |
| C  | 3.106891000  | 3.184947000  | -4.751600000 | C | -1.849024000 | -3.680831000 | 2.780338000  |

|   |              |              |              |                       |              |              |              |
|---|--------------|--------------|--------------|-----------------------|--------------|--------------|--------------|
| C | -1.699640000 | -3.955150000 | 5.064511000  | H                     | -5.483807000 | 2.504193000  | 3.214800000  |
| C | -2.947985000 | -3.444855000 | 4.784770000  | H                     | -4.671561000 | 2.900700000  | 1.672959000  |
| C | 0.288366000  | -4.221991000 | -3.143601000 | H                     | -4.568650000 | -0.252348000 | 4.242384000  |
| C | -0.228279000 | 4.210629000  | -3.152898000 | H                     | -4.253023000 | -3.402641000 | 1.689554000  |
| C | -0.338393000 | 4.803573000  | 3.660982000  | H                     | -5.105681000 | -3.105650000 | 3.231339000  |
| C | 0.258223000  | -4.807375000 | 3.663884000  | H                     | -1.261935000 | -4.254263000 | 6.008987000  |
| H | 3.115730000  | -3.599788000 | -5.408002000 | H                     | -3.778529000 | -3.220184000 | 5.442502000  |
| H | 4.315507000  | -1.165610000 | -6.005785000 | H                     | 0.310836000  | -4.533298000 | -4.182910000 |
| H | 5.853808000  | 0.340252000  | -4.475950000 | H                     | -0.235052000 | 4.515966000  | -4.194181000 |
| H | 5.574225000  | 0.323803000  | -2.702262000 | H                     | -0.350412000 | 5.230985000  | 2.652680000  |
| H | 2.662689000  | 3.925581000  | -5.404778000 | H                     | -0.390000000 | 5.611116000  | 4.403866000  |
| H | 4.157952000  | 1.661604000  | -6.005491000 | H                     | 0.286195000  | -5.232595000 | 2.654951000  |
| H | 3.423560000  | -4.125919000 | -1.635093000 | H                     | 0.290254000  | -5.617331000 | 4.405233000  |
| H | 3.083931000  | -4.979702000 | -3.167430000 | H                     | 3.664450000  | 3.205615000  | 5.509308000  |
| H | 2.460637000  | 5.282860000  | -3.157791000 | H                     | 1.900195000  | 0.050936000  | -2.341996000 |
| H | 2.890127000  | 4.467066000  | -1.627897000 | C                     | 0.855738000  | -0.051258000 | -2.003479000 |
| H | 1.137469000  | 4.236334000  | 6.033083000  | C                     | 0.766122000  | 0.045154000  | -0.463799000 |
| H | 5.036430000  | 3.095349000  | 3.318966000  | C                     | -0.687273000 | 0.005151000  | 0.059334000  |
| H | 4.213702000  | 3.403165000  | 1.762917000  | C                     | -0.730932000 | 0.086249000  | 1.602692000  |
| H | 4.466903000  | 0.254009000  | 4.319772000  | H                     | 0.258352000  | 0.750524000  | -2.474393000 |
| H | 4.635872000  | -2.901259000 | 1.763220000  | H                     | 0.471383000  | -1.025346000 | -2.352998000 |
| H | 5.409606000  | -2.487326000 | 3.319987000  | H                     | 1.232637000  | 0.984010000  | -0.122463000 |
| H | 1.673821000  | -4.097354000 | 6.033553000  | H                     | 1.343403000  | -0.774062000 | -0.001751000 |
| H | 4.070449000  | -2.791271000 | 5.507680000  | H                     | -1.179368000 | -0.921160000 | -0.285213000 |
| H | -2.583710000 | -3.943957000 | -5.442788000 | H                     | -1.248544000 | 0.849297000  | -0.379046000 |
| H | -4.069223000 | -1.680780000 | -6.071257000 | H                     | -0.204317000 | 0.998533000  | 1.942505000  |
| H | -5.775204000 | -0.350115000 | -4.570956000 | H                     | -0.227562000 | -0.796061000 | 2.040635000  |
| H | -5.523324000 | -0.329861000 | -2.793565000 | H                     | -1.763354000 | 0.125090000  | 1.979394000  |
| H | -3.054693000 | 3.609914000  | -5.460689000 | <u>Iso-butane@PPX</u> |              |              |              |
| H | -4.247275000 | 1.176789000  | -6.078470000 | Au                    | 4.315802000  | -1.067973000 | -0.837608000 |
| H | -2.853284000 | -4.466387000 | -1.668906000 | Au                    | 3.815198000  | 2.136020000  | -0.838366000 |
| H | -2.399981000 | -5.285263000 | -3.190034000 | Au                    | 1.044110000  | 3.789295000  | 0.808171000  |
| H | -3.020850000 | 4.972404000  | -3.217612000 | Au                    | 2.171028000  | -3.414886000 | 0.829778000  |
| H | -3.384897000 | 4.118168000  | -1.691542000 | Au                    | -3.863799000 | -2.173116000 | -0.801830000 |
| H | -1.792948000 | 4.080462000  | 6.001960000  | Au                    | -4.315595000 | 1.050860000  | -0.824126000 |
| H | -4.179513000 | 2.776132000  | 5.428683000  | Au                    | -2.182005000 | 3.458808000  | 0.823123000  |

|    |              |              |              |   |              |              |              |
|----|--------------|--------------|--------------|---|--------------|--------------|--------------|
| Au | -1.051378000 | -3.743363000 | 0.846607000  | C | 1.530775000  | 3.790838000  | 2.759051000  |
| N  | 3.616016000  | -2.690934000 | -3.368053000 | C | 1.321519000  | 3.961360000  | 5.049683000  |
| N  | 4.351303000  | -0.684657000 | -3.849421000 | C | 2.610064000  | 3.560983000  | 4.775423000  |
| N  | 3.968481000  | 1.768073000  | -3.851287000 | C | 3.977212000  | 3.156404000  | 2.636076000  |
| N  | 2.670077000  | 3.466311000  | -3.373845000 | C | 4.153001000  | 1.690750000  | 2.332688000  |
| N  | 1.265641000  | -3.703949000 | -1.043418000 | C | 4.373928000  | 0.587297000  | 3.188521000  |
| N  | 0.096985000  | 3.864777000  | -1.063759000 | C | 4.535896000  | -0.527742000 | 2.335893000  |
| N  | 0.663656000  | 4.101276000  | 3.808805000  | C | 4.810388000  | -1.975780000 | 2.652990000  |
| N  | 2.718045000  | 3.468682000  | 3.375514000  | C | 2.631019000  | -3.256145000 | 2.778239000  |
| N  | 4.186950000  | 1.263823000  | 1.029787000  | C | 2.429112000  | -3.396731000 | 5.071386000  |
| N  | 4.429212000  | -0.116503000 | 1.030549000  | C | 3.580861000  | -2.694738000 | 4.794111000  |
| N  | 3.687383000  | -2.625029000 | 3.392733000  | C | -3.538876000 | -2.568966000 | -2.744225000 |
| N  | 1.848688000  | -3.735555000 | 3.830156000  | C | -2.698253000 | -3.368174000 | -4.729380000 |
| N  | -2.720086000 | -3.509447000 | -3.329699000 | C | -3.522232000 | -2.308788000 | -5.036065000 |
| N  | -4.028554000 | -1.819097000 | -3.813892000 | C | -5.011110000 | -0.713707000 | -3.711165000 |
| N  | -4.410440000 | 0.635339000  | -3.833866000 | C | -4.142579000 | 1.502739000  | -2.774354000 |
| N  | -3.662880000 | 2.643527000  | -3.378047000 | C | -3.633968000 | 2.509775000  | -4.778237000 |
| N  | -0.126918000 | -3.859259000 | -1.035405000 | C | -4.106918000 | 1.249509000  | -5.067233000 |
| N  | -1.292147000 | 3.689859000  | -1.063357000 | C | -1.971311000 | -4.555410000 | -2.571404000 |
| N  | -1.829229000 | 3.807158000  | 3.820331000  | C | -0.525920000 | -4.205995000 | -2.303720000 |
| N  | -3.655983000 | 2.670162000  | 3.402304000  | C | -3.231106000 | 3.862398000  | -2.631447000 |
| N  | -4.372902000 | 0.122666000  | 1.058535000  | C | -1.749164000 | 3.897299000  | -2.341992000 |
| N  | -4.170687000 | -1.263796000 | 1.068619000  | C | -2.613144000 | 3.312927000  | 2.777489000  |
| N  | -2.712705000 | -3.453209000 | 3.426413000  | C | -2.397290000 | 3.469501000  | 5.067448000  |
| N  | -0.645372000 | -4.052829000 | 3.844897000  | C | -3.542072000 | 2.750926000  | 4.802202000  |
| C  | 4.101046000  | -1.544252000 | -2.779952000 | C | -4.765334000 | 1.993128000  | 2.668262000  |
| C  | 3.564913000  | -2.566877000 | -4.768335000 | C | -4.470594000 | 0.546452000  | 2.360606000  |
| C  | 4.030259000  | -1.307687000 | -5.073365000 | C | -4.326796000 | -0.564362000 | 3.223159000  |
| C  | 4.952462000  | 0.666003000  | -3.747411000 | C | -4.136993000 | -1.679598000 | 2.375998000  |
| C  | 3.484146000  | 2.525249000  | -2.784498000 | C | -3.977722000 | -3.143127000 | 2.695337000  |
| C  | 2.642449000  | 3.316820000  | -4.772554000 | C | -1.522980000 | -3.748807000 | 2.801561000  |
| C  | 3.460495000  | 2.252109000  | -5.075214000 | C | -1.300304000 | -3.935796000 | 5.089905000  |
| C  | 3.197104000  | -3.907735000 | -2.610879000 | C | -2.596872000 | -3.555559000 | 4.824905000  |
| C  | 1.716312000  | -3.945015000 | -2.317437000 | C | 0.612521000  | -4.266847000 | -3.143135000 |
| C  | 1.933383000  | 4.522763000  | -2.620161000 | C | -0.650848000 | 4.209342000  | -3.178523000 |
| C  | 0.489396000  | 4.181081000  | -2.341442000 | C | -0.675318000 | 4.721030000  | 3.654479000  |

|   |              |              |              |                                        |              |              |              |
|---|--------------|--------------|--------------|----------------------------------------|--------------|--------------|--------------|
| C | 0.698749000  | -4.657762000 | 3.679032000  | H                                      | -0.818506000 | -4.165147000 | 6.032375000  |
| H | 3.249188000  | -3.375162000 | -5.415983000 | H                                      | -3.432034000 | -3.392541000 | 5.494838000  |
| H | 4.193182000  | -0.835952000 | -6.034375000 | H                                      | 0.639355000  | -4.547916000 | -4.190906000 |
| H | 5.673344000  | 0.776687000  | -4.568917000 | H                                      | -0.683850000 | 4.464295000  | -4.232726000 |
| H | 5.471616000  | 0.748843000  | -2.786750000 | H                                      | -0.732856000 | 5.167720000  | 2.656312000  |
| H | 2.092267000  | 3.986316000  | -5.421652000 | H                                      | -0.763008000 | 5.509449000  | 4.414611000  |
| H | 3.746923000  | 1.841341000  | -6.035324000 | H                                      | 0.750223000  | -5.107616000 | 2.682153000  |
| H | 3.761684000  | -3.913608000 | -1.667487000 | H                                      | 0.801254000  | -5.443151000 | 4.440392000  |
| H | 3.495708000  | -4.783521000 | -3.204996000 | H                                      | 3.445474000  | 3.379029000  | 5.440115000  |
| H | 1.999649000  | 5.450356000  | -3.207458000 | C                                      | 1.034162000  | -0.145570000 | 1.106860000  |
| H | 2.464397000  | 4.670539000  | -1.669105000 | C                                      | 0.286301000  | -0.410085000 | -0.219114000 |
| H | 0.847965000  | 4.190922000  | 5.996252000  | H                                      | 0.397135000  | -1.471645000 | -0.472372000 |
| H | 4.811594000  | 3.530702000  | 3.247504000  | H                                      | 0.605992000  | -0.767468000 | 1.914509000  |
| H | 3.952956000  | 3.723519000  | 1.694627000  | H                                      | 2.096866000  | -0.394640000 | 1.011768000  |
| H | 4.440134000  | 0.599623000  | 4.271164000  | H                                      | 0.946931000  | 0.917944000  | 1.392319000  |
| H | 4.959575000  | -2.536828000 | 1.719462000  | C                                      | 0.856100000  | 0.416487000  | -1.395788000 |
| H | 5.712410000  | -2.080186000 | 3.273663000  | C                                      | -1.212174000 | -0.123303000 | -0.039840000 |
| H | 2.011307000  | -3.706182000 | 6.021470000  | H                                      | 0.222979000  | 0.299161000  | -2.294839000 |
| H | 4.332068000  | -2.286557000 | 5.458863000  | H                                      | 0.890356000  | 1.485285000  | -1.135088000 |
| H | -2.146328000 | -4.038218000 | -5.376500000 | H                                      | 1.877004000  | 0.091656000  | -1.648500000 |
| H | -3.811947000 | -1.904579000 | -5.998002000 | H                                      | -1.375747000 | 0.917485000  | 0.280508000  |
| H | -5.741745000 | -0.833444000 | -4.522805000 | H                                      | -1.745280000 | -0.269257000 | -0.993562000 |
| H | -5.517872000 | -0.784944000 | -2.742959000 | H                                      | -1.657860000 | -0.789402000 | 0.714886000  |
| H | -3.326449000 | 3.312506000  | -5.436707000 | <u>2C<sub>2</sub>H<sub>2</sub>@PPX</u> |              |              |              |
| H | -4.286060000 | 0.771986000  | -6.022528000 | Au                                     | 4.095251000  | 0.997908000  | 0.831890000  |
| H | -2.495498000 | -4.701319000 | -1.616077000 | Au                                     | 3.616530000  | -2.094813000 | 0.829147000  |
| H | -2.034923000 | -5.487807000 | -3.151436000 | Au                                     | 0.997029000  | -3.803723000 | -0.851740000 |
| H | -3.525774000 | 4.735754000  | -3.231258000 | Au                                     | 2.110697000  | 3.403992000  | -0.850432000 |
| H | -3.792690000 | 3.880608000  | -1.686376000 | Au                                     | -3.616559000 | 2.095059000  | 0.828765000  |
| H | -1.977355000 | 3.790515000  | 6.012764000  | Au                                     | -4.094910000 | -0.997763000 | 0.831845000  |
| H | -4.283375000 | 2.337232000  | 5.474628000  | Au                                     | -2.110735000 | -3.404352000 | -0.850198000 |
| H | -5.669702000 | 2.084542000  | 3.287745000  | Au                                     | -0.997098000 | 3.803538000  | -0.852170000 |
| H | -4.926303000 | 2.543966000  | 1.730596000  | N                                      | 3.645607000  | 2.634669000  | 3.381211000  |
| H | -4.387237000 | -0.566004000 | 4.306225000  | N                                      | 4.377581000  | 0.623496000  | 3.844265000  |
| H | -3.968141000 | -3.722758000 | 1.761194000  | N                                      | 4.000731000  | -1.833219000 | 3.841508000  |
| H | -4.808415000 | -3.501490000 | 3.320915000  | N                                      | 2.700890000  | -3.532533000 | 3.373017000  |



|   |              |              |              |   |              |              |              |
|---|--------------|--------------|--------------|---|--------------|--------------|--------------|
| N | 1.261866000  | 3.598983000  | 1.056112000  | C | 4.277850000  | -0.609051000 | -3.210438000 |
| N | 0.124637000  | -3.784910000 | 1.055265000  | C | 4.328807000  | 0.523538000  | -2.367586000 |
| N | 0.624289000  | -4.239365000 | -3.843518000 | C | 4.690593000  | 1.954859000  | -2.671430000 |
| N | 2.662469000  | -3.562733000 | -3.415291000 | C | 2.583101000  | 3.335569000  | -2.800294000 |
| N | 3.854885000  | -1.253855000 | -1.076150000 | C | 2.449649000  | 3.595318000  | -5.086242000 |
| N | 4.069659000  | 0.131053000  | -1.075367000 | C | 3.561579000  | 2.828106000  | -4.816962000 |
| N | 3.626126000  | 2.685966000  | -3.418641000 | C | -3.444157000 | 2.541175000  | 2.778078000  |
| N | 1.854109000  | 3.900365000  | -3.843973000 | C | -2.781484000 | 3.460959000  | 4.774663000  |
| N | -2.701244000 | 3.532992000  | 3.372542000  | C | -3.601581000 | 2.394829000  | 5.072301000  |
| N | -4.001127000 | 1.833744000  | 3.841114000  | C | -4.972123000 | 0.725425000  | 3.705050000  |
| N | -4.377692000 | -0.623000000 | 3.844113000  | C | -4.055905000 | -1.466652000 | 2.783478000  |
| N | -3.645754000 | -2.634240000 | 3.381357000  | C | -3.702666000 | -2.538548000 | 4.783088000  |
| N | -0.124887000 | 3.784843000  | 1.054889000  | C | -4.166279000 | -1.274910000 | 5.076895000  |
| N | -1.262130000 | -3.599082000 | 1.056456000  | C | -1.930888000 | 4.556379000  | 2.604954000  |
| N | -1.853912000 | -3.900842000 | -3.843683000 | C | -0.505804000 | 4.157756000  | 2.320684000  |
| N | -3.625860000 | -2.686289000 | -3.418517000 | C | -3.205002000 | -3.838809000 | 2.615742000  |
| N | -4.068864000 | -0.131219000 | -1.075569000 | C | -1.726892000 | -3.854997000 | 2.323820000  |
| N | -3.854286000 | 1.253717000  | -1.076494000 | C | -2.582979000 | -3.336019000 | -2.800069000 |
| N | -2.662411000 | 3.562347000  | -3.415783000 | C | -2.449280000 | -3.595707000 | -5.086016000 |
| N | -0.624138000 | 4.238751000  | -3.843957000 | C | -3.561178000 | -2.828411000 | -4.816834000 |
| C | 4.055826000  | 1.466997000  | 2.783498000  | C | -4.690368000 | -1.955109000 | -2.671407000 |
| C | 3.702493000  | 2.539175000  | 4.782938000  | C | -4.328586000 | -0.523767000 | -2.367650000 |
| C | 4.166114000  | 1.275583000  | 5.076953000  | C | -4.278059000 | 0.608799000  | -3.210590000 |
| C | 4.971850000  | -0.725007000 | 3.705397000  | C | -3.980814000 | 1.703806000  | -2.366166000 |
| C | 3.443775000  | -2.540699000 | 2.778494000  | C | -3.894465000 | 3.177500000  | -2.668113000 |
| C | 2.781075000  | -3.460386000 | 4.775133000  | C | -1.475557000 | 3.884055000  | -2.799269000 |
| C | 3.601163000  | -2.394227000 | 5.072723000  | C | -1.287893000 | 4.127373000  | -5.084476000 |
| C | 3.204745000  | 3.839045000  | 2.615401000  | C | -2.568274000 | 3.698987000  | -4.813388000 |
| C | 1.726628000  | 3.855055000  | 2.323495000  | C | 0.636756000  | 4.205284000  | 3.151354000  |
| C | 1.930662000  | -4.556078000 | 2.605506000  | C | -0.637049000 | -4.205106000 | 3.151776000  |
| C | 0.505554000  | -4.157610000 | 2.321156000  | C | -0.719091000 | -4.836261000 | -3.671863000 |
| C | 1.475578000  | -3.884421000 | -2.798823000 | C | 0.719227000  | 4.835712000  | -3.672264000 |
| C | 1.288164000  | -4.128244000 | -5.083999000 | H | 3.449606000  | 3.364067000  | 5.437233000  |
| C | 2.568491000  | -3.699715000 | -4.812884000 | H | 4.390847000  | 0.817307000  | 6.032092000  |
| C | 3.894452000  | -3.177736000 | -2.667594000 | H | 5.733921000  | -0.842476000 | 4.487409000  |
| C | 3.980828000  | -1.704001000 | -2.365856000 | H | 5.439148000  | -0.795676000 | 2.717396000  |

|   |              |              |              |                                        |              |              |              |
|---|--------------|--------------|--------------|----------------------------------------|--------------|--------------|--------------|
| H | 2.291941000  | -4.173009000 | 5.427370000  | H                                      | -0.828417000 | -5.635217000 | -4.417738000 |
| H | 3.950686000  | -2.025877000 | 6.029329000  | H                                      | 0.777326000  | 5.261375000  | -2.664694000 |
| H | 3.766634000  | 3.848718000  | 1.670389000  | H                                      | 0.828538000  | 5.634645000  | -4.418167000 |
| H | 3.489954000  | 4.722589000  | 3.204110000  | H                                      | 3.405151000  | -3.522872000 | -5.477358000 |
| H | 1.956915000  | -5.487639000 | 3.188997000  | C                                      | 0.592966000  | 0.165123000  | -1.291976000 |
| H | 2.460370000  | -4.721126000 | 1.656459000  | C                                      | -0.591495000 | -0.166506000 | -1.295298000 |
| H | 0.824108000  | -4.391660000 | -6.026462000 | H                                      | 1.626507000  | 0.446316000  | -1.233970000 |
| H | 4.756192000  | -3.498006000 | -3.270795000 | H                                      | -1.625279000 | -0.447731000 | -1.242509000 |
| H | 3.896787000  | -3.742609000 | -1.724450000 | C                                      | 0.608853000  | -0.072034000 | 2.241686000  |
| H | 4.465513000  | -0.638782000 | -4.278560000 | C                                      | -0.611660000 | 0.075693000  | 2.245330000  |
| H | 4.863335000  | 2.496329000  | -1.730291000 | H                                      | 1.672749000  | -0.200084000 | 2.183740000  |
| H | 5.606970000  | 2.000559000  | -3.277305000 | H                                      | -1.675832000 | 0.203493000  | 2.194305000  |
| H | 2.068756000  | 3.967471000  | -6.029338000 | <u>2C<sub>2</sub>H<sub>4</sub>@PPX</u> |              |              |              |
| H | 4.308892000  | 2.416091000  | -5.483716000 | Au                                     | -3.706923000 | -1.870026000 | 0.822092000  |
| H | -2.292394000 | 4.173644000  | 5.426860000  | Au                                     | -4.006316000 | 1.228944000  | 0.833242000  |
| H | -3.951191000 | 2.026611000  | 6.028918000  | Au                                     | -1.883730000 | 3.495147000  | -0.846877000 |
| H | -5.734253000 | 0.842880000  | 4.486992000  | Au                                     | -1.230414000 | -3.760455000 | -0.868380000 |
| H | -5.439367000 | 0.795928000  | 2.717034000  | Au                                     | 3.992944000  | -1.224699000 | 0.838014000  |
| H | -3.449857000 | -3.363370000 | 5.437504000  | Au                                     | 3.725817000  | 1.877590000  | 0.847520000  |
| H | -4.391040000 | -0.816523000 | 6.031965000  | Au                                     | 1.227899000  | 3.737294000  | -0.838355000 |
| H | -2.460552000 | 4.721386000  | 1.655892000  | Au                                     | 1.890266000  | -3.503406000 | -0.865158000 |
| H | -1.957063000 | 5.487998000  | 3.188346000  | N                                      | -2.912091000 | -3.386511000 | 3.363367000  |
| H | -3.490280000 | -4.722201000 | 3.204641000  | N                                      | -4.098016000 | -1.607162000 | 3.834183000  |
| H | -3.766911000 | -3.848602000 | 1.670762000  | N                                      | -4.322972000 | 0.869449000  | 3.842805000  |
| H | -2.068296000 | -3.967849000 | -6.029080000 | N                                      | -3.478576000 | 2.836353000  | 3.383180000  |
| H | -4.308385000 | -2.416324000 | -5.483661000 | N                                      | -0.361746000 | -3.795966000 | 1.039460000  |
| H | -5.606686000 | -2.000804000 | -3.277363000 | N                                      | -1.039256000 | 3.645366000  | 1.066981000  |
| H | -4.863182000 | -2.496510000 | -1.730256000 | N                                      | -1.602025000 | 4.005283000  | -3.838658000 |
| H | -4.466183000 | 0.638454000  | -4.278634000 | N                                      | -3.444428000 | 2.898558000  | -3.415353000 |
| H | -3.896868000 | 3.742519000  | -1.725069000 | N                                      | -4.032733000 | 0.374067000  | -1.078289000 |
| H | -4.756154000 | 3.497648000  | -3.271440000 | N                                      | -3.901606000 | -1.018339000 | -1.081664000 |
| H | -0.823732000 | 4.390535000  | -6.026957000 | N                                      | -2.872710000 | -3.392353000 | -3.429127000 |
| H | -3.404876000 | 3.522070000  | -5.477906000 | N                                      | -0.874848000 | -4.175083000 | -3.865851000 |
| H | 0.674869000  | 4.493793000  | 4.196693000  | N                                      | 3.459677000  | -2.854948000 | 3.375483000  |
| H | -0.675185000 | -4.493523000 | 4.197142000  | N                                      | 4.304170000  | -0.892500000 | 3.851870000  |
| H | -0.777293000 | -5.261861000 | -2.664273000 | N                                      | 4.081983000  | 1.584149000  | 3.859831000  |

|   |              |              |              |   |              |              |              |
|---|--------------|--------------|--------------|---|--------------|--------------|--------------|
| N | 2.897608000  | 3.365143000  | 3.393411000  | C | 2.971464000  | 3.286348000  | 4.795667000  |
| N | 1.033331000  | -3.686162000 | 1.040306000  | C | 3.719696000  | 2.168368000  | 5.091777000  |
| N | 0.357472000  | 3.751097000  | 1.070654000  | C | 2.959476000  | -4.027926000 | 2.600012000  |
| N | 0.892372000  | 4.209686000  | -3.831259000 | C | 1.482787000  | -3.963651000 | 2.307955000  |
| N | 2.890197000  | 3.424320000  | -3.395407000 | C | 2.197267000  | 4.434837000  | 2.624561000  |
| N | 3.932475000  | 1.041348000  | -1.059208000 | C | 0.752828000  | 4.120255000  | 2.333303000  |
| N | 4.054791000  | -0.351728000 | -1.065186000 | C | 1.717633000  | 3.803863000  | -2.784122000 |
| N | 3.455195000  | -2.859868000 | -3.421203000 | C | 1.557701000  | 4.072839000  | -5.068283000 |
| N | 1.617856000  | -3.966837000 | -3.862216000 | C | 2.812451000  | 3.575931000  | -4.792251000 |
| C | -3.580351000 | -2.341594000 | 2.769849000  | C | 4.095570000  | 2.967642000  | -2.641108000 |
| C | -2.999522000 | -3.320096000 | 4.765816000  | C | 4.093202000  | 1.490568000  | -2.346389000 |
| C | -3.748275000 | -2.202969000 | 5.064377000  | C | 4.320537000  | 0.383145000  | -3.194855000 |
| C | -4.997715000 | -0.439133000 | 3.699934000  | C | 4.292732000  | -0.754028000 | -2.355519000 |
| C | -3.954981000 | 1.694745000  | 2.783620000  | C | 4.560494000  | -2.203846000 | -2.663681000 |
| C | -3.538768000 | 2.741481000  | 4.785341000  | C | 2.371819000  | -3.447827000 | -2.812112000 |
| C | -4.073084000 | 1.505763000  | 5.077102000  | C | 2.237778000  | -3.692143000 | -5.099775000 |
| C | -2.210360000 | -4.453912000 | 2.591753000  | C | 3.391047000  | -2.992484000 | -4.820318000 |
| C | -0.764006000 | -4.141498000 | 2.306161000  | C | 0.374390000  | -4.248470000 | 3.137762000  |
| C | -2.971312000 | 4.012925000  | 2.617081000  | C | -0.389017000 | 4.244703000  | 3.156467000  |
| C | -1.493779000 | 3.945891000  | 2.328372000  | C | -0.418400000 | 4.876891000  | -3.661063000 |
| C | -2.359262000 | 3.474025000  | -2.796736000 | C | 0.435639000  | -4.842999000 | -3.700755000 |
| C | -2.222849000 | 3.752194000  | -5.080609000 | H | -2.567739000 | -4.070331000 | 5.416438000  |
| C | -3.379130000 | 3.052716000  | -4.812333000 | H | -4.082277000 | -1.819228000 | 6.020513000  |
| C | -4.552147000 | 2.233310000  | -2.666505000 | H | -5.766554000 | -0.512594000 | 4.480737000  |
| C | -4.278849000 | 0.782927000  | -2.365549000 | H | -5.467286000 | -0.479010000 | 2.711181000  |
| C | -4.305338000 | -0.349387000 | -3.211211000 | H | -3.239994000 | 3.549753000  | 5.441086000  |
| C | -4.068641000 | -1.460827000 | -2.370435000 | H | -4.324371000 | 1.059692000  | 6.031474000  |
| C | -4.076374000 | -2.936072000 | -2.674317000 | H | -2.751890000 | -4.580690000 | 1.643523000  |
| C | -1.706732000 | -3.788369000 | -2.817572000 | H | -2.292973000 | -5.384567000 | 3.171361000  |
| C | -1.529716000 | -4.009687000 | -5.104726000 | H | -3.206254000 | 4.912796000  | 3.203195000  |
| C | -2.784919000 | -3.514276000 | -4.828059000 | H | -3.529674000 | 4.051723000  | 1.670914000  |
| C | 3.930828000  | -1.705636000 | 2.785440000  | H | -1.825065000 | 4.110869000  | -6.022022000 |
| C | 3.527055000  | -2.775432000 | 4.778407000  | H | -5.464470000 | 2.338505000  | -3.270985000 |
| C | 4.061157000  | -1.541961000 | 5.080214000  | H | -4.687411000 | 2.782471000  | -1.723703000 |
| C | 4.980633000  | 0.417484000  | 3.722416000  | H | -4.507512000 | -0.366001000 | -4.277029000 |
| C | 3.573102000  | 2.326638000  | 2.797740000  | H | -4.107002000 | -3.502006000 | -1.732176000 |

|   |              |              |              |                    |              |              |              |
|---|--------------|--------------|--------------|--------------------|--------------|--------------|--------------|
| H | -4.958789000 | -3.202053000 | -3.273967000 | C                  | -0.759516000 | 0.105309000  | 2.018038000  |
| H | -1.079468000 | -4.285190000 | -6.050453000 | H                  | 0.778886000  | -1.137789000 | 2.843695000  |
| H | -3.609623000 | -3.281260000 | -5.490159000 | H                  | -1.592912000 | -0.369821000 | 2.545064000  |
| H | 3.234757000  | -3.592038000 | 5.426776000  | H                  | 1.345388000  | 0.162553000  | 1.633293000  |
| H | 4.316467000  | -1.105240000 | 6.037846000  | H                  | -1.017836000 | 0.918492000  | 1.334771000  |
| H | 5.745172000  | 0.482583000  | 4.508208000  | <u>2Allene@PPX</u> |              |              |              |
| H | 5.456834000  | 0.463156000  | 2.737046000  | Au                 | 4.145443000  | 1.652646000  | 0.839398000  |
| H | 2.530443000  | 4.029101000  | 5.448574000  | Au                 | 4.201939000  | -1.497108000 | 0.860560000  |
| H | 4.044702000  | 1.776572000  | 6.047742000  | Au                 | 1.679088000  | -3.396746000 | -0.804252000 |
| H | 3.519844000  | -4.057805000 | 1.654690000  | Au                 | 1.540760000  | 3.442001000  | -0.833736000 |
| H | 3.197347000  | -4.930947000 | 3.180209000  | Au                 | -4.214082000 | 1.502070000  | 0.792155000  |
| H | 2.274580000  | 5.362829000  | 3.208984000  | Au                 | -4.139234000 | -1.635481000 | 0.792867000  |
| H | 2.742169000  | 4.568208000  | 1.679180000  | Au                 | -1.513197000 | -3.430897000 | -0.840221000 |
| H | 1.113956000  | 4.366477000  | -6.011671000 | Au                 | -1.669190000 | 3.384057000  | -0.857590000 |
| H | 3.642938000  | 3.359703000  | -5.452835000 | N                  | 3.164974000  | 3.127288000  | 3.348746000  |
| H | 4.976841000  | 3.241956000  | -3.238544000 | N                  | 4.307350000  | 1.332231000  | 3.862848000  |
| H | 4.121889000  | 3.527752000  | -1.695439000 | N                  | 4.351687000  | -1.137780000 | 3.878862000  |
| H | 4.517047000  | 0.404951000  | -4.261600000 | N                  | 3.276370000  | -2.979579000 | 3.385067000  |
| H | 4.688759000  | -2.758436000 | -1.723083000 | N                  | 0.620991000  | 3.534421000  | 1.050251000  |
| H | 5.476211000  | -2.309349000 | -3.263140000 | N                  | 0.762690000  | -3.492162000 | 1.082728000  |
| H | 1.841522000  | -4.038005000 | -6.046595000 | N                  | 1.383783000  | -3.921768000 | -3.786304000 |
| H | 4.165516000  | -2.622725000 | -5.480799000 | N                  | 3.350607000  | -3.048664000 | -3.366853000 |
| H | 0.396746000  | -4.540342000 | 4.182684000  | N                  | 4.376759000  | -0.630510000 | -1.037445000 |
| H | -0.414831000 | 4.547582000  | 4.198073000  | N                  | 4.355065000  | 0.767956000  | -1.047875000 |
| H | -0.455960000 | 5.300839000  | -2.651712000 | N                  | 3.205930000  | 3.094212000  | -3.402835000 |
| H | -0.482242000 | 5.683563000  | -4.403842000 | N                  | 1.205002000  | 3.888436000  | -3.820606000 |
| H | 0.470649000  | -5.281921000 | -2.697815000 | N                  | -3.327101000 | 3.005760000  | 3.317172000  |
| H | 0.503391000  | -5.638813000 | -4.454859000 | N                  | -4.409499000 | 1.166713000  | 3.809026000  |
| H | -4.154393000 | 2.695622000  | -5.478876000 | N                  | -4.367104000 | -1.304929000 | 3.810910000  |
| C | 0.727277000  | 0.138525000  | -1.303159000 | N                  | -3.217049000 | -3.104016000 | 3.325022000  |
| C | -0.622918000 | 0.052072000  | -1.355033000 | N                  | -0.780885000 | 3.509736000  | 1.042705000  |
| H | 1.316415000  | -0.520511000 | -0.659682000 | N                  | -0.638915000 | -3.514270000 | 1.067761000  |
| H | -1.172161000 | -0.683042000 | -0.759504000 | N                  | -1.135328000 | -3.941617000 | -3.814936000 |
| H | 1.287802000  | 0.878248000  | -1.881631000 | N                  | -3.132548000 | -3.121525000 | -3.435515000 |
| H | -1.223407000 | 0.722954000  | -1.977212000 | N                  | -4.344971000 | -0.768739000 | -1.103415000 |
| C | 0.519575000  | -0.307422000 | 2.178904000  | N                  | -4.398568000 | 0.628964000  | -1.100755000 |

|   |              |              |              |   |              |              |              |
|---|--------------|--------------|--------------|---|--------------|--------------|--------------|
| N | -3.300737000 | 3.019473000  | -3.440795000 | C | -1.768409000 | -3.803432000 | -5.069622000 |
| N | -1.318633000 | 3.867774000  | -3.839198000 | C | -3.021069000 | -3.284682000 | -4.829378000 |
| C | 3.879014000  | 2.096927000  | 2.780924000  | C | -4.361182000 | -2.667871000 | -2.719197000 |
| C | 3.144305000  | 3.023401000  | 4.751123000  | C | -4.360371000 | -1.194581000 | -2.406816000 |
| C | 3.865068000  | 1.896518000  | 5.077008000  | C | -4.427474000 | -0.068589000 | -3.259492000 |
| C | 5.138683000  | 0.111000000  | 3.772573000  | C | -4.443849000 | 1.056763000  | -2.404475000 |
| C | 3.952943000  | -1.930430000 | 2.805998000  | C | -4.510345000 | 2.529304000  | -2.714033000 |
| C | 3.249447000  | -2.859383000 | 4.786088000  | C | -2.151190000 | 3.432414000  | -2.806991000 |
| C | 3.928131000  | -1.703077000 | 5.099364000  | C | -1.958103000 | 3.711823000  | -5.088229000 |
| C | 2.497626000  | 4.208278000  | 2.566533000  | C | -3.201065000 | 3.175081000  | -4.836316000 |
| C | 1.035151000  | 3.952248000  | 2.293818000  | C | -0.100823000 | 4.190834000  | 3.099744000  |
| C | 2.652005000  | -4.094586000 | 2.614340000  | C | 0.051536000  | -4.170687000 | 3.128972000  |
| C | 1.183449000  | -3.893372000 | 2.329333000  | C | 0.127094000  | -4.687739000 | -3.604526000 |
| C | 2.197126000  | -3.472675000 | -2.745611000 | C | -0.065036000 | 4.633706000  | -3.642735000 |
| C | 2.037103000  | -3.765111000 | -5.027525000 | H | 2.665167000  | 3.758530000  | 5.385328000  |
| C | 3.270644000  | -3.212705000 | -4.762634000 | H | 4.125327000  | 1.487774000  | 6.045445000  |
| C | 4.546461000  | -2.542182000 | -2.627595000 | H | 5.865713000  | 0.129488000  | 4.595595000  |
| C | 4.476480000  | -1.065888000 | -2.334119000 | H | 5.662907000  | 0.114119000  | 2.810787000  |
| C | 4.523090000  | 0.054622000  | -3.195241000 | H | 2.796350000  | -3.603660000 | 5.428694000  |
| C | 4.437221000  | 1.186296000  | -2.352965000 | H | 4.171700000  | -1.273685000 | 6.063196000  |
| C | 4.433254000  | 2.658585000  | -2.669176000 | H | 3.039688000  | 4.302121000  | 1.614820000  |
| C | 2.043057000  | 3.485501000  | -2.779597000 | H | 2.616560000  | 5.143963000  | 3.131611000  |
| C | 1.852619000  | 3.729809000  | -5.064368000 | H | 2.799336000  | -5.017174000 | 3.193956000  |
| C | 3.107210000  | 3.227217000  | -4.800479000 | H | 3.203566000  | -4.183454000 | 1.667637000  |
| C | -3.995693000 | 1.953565000  | 2.737032000  | H | 1.601937000  | -4.085285000 | -5.966234000 |
| C | -3.316898000 | 2.893655000  | 4.718705000  | H | 5.430599000  | -2.781813000 | -3.235882000 |
| C | -3.999916000 | 1.739391000  | 5.031108000  | H | 4.606111000  | -3.099302000 | -1.681545000 |
| C | -5.196034000 | -0.083112000 | 3.700869000  | H | 4.627919000  | 0.048237000  | -4.274853000 |
| C | -3.917943000 | -2.075273000 | 2.741006000  | H | 4.475036000  | 3.231653000  | -1.731747000 |
| C | -3.220582000 | -2.993456000 | 4.726586000  | H | 5.297823000  | 2.932868000  | -3.290691000 |
| C | -3.946079000 | -1.864436000 | 5.035191000  | H | 1.398538000  | 4.015716000  | -6.005165000 |
| C | -2.691834000 | 4.112416000  | 2.543385000  | H | 3.927053000  | 2.997527000  | -5.469885000 |
| C | -1.219525000 | 3.911048000  | 2.281197000  | H | -2.873146000 | 3.642453000  | 5.362678000  |
| C | -2.536705000 | -4.186393000 | 2.555524000  | H | -4.259416000 | 1.318802000  | 5.994768000  |
| C | -1.071248000 | -3.930889000 | 2.303684000  | H | -5.932463000 | -0.095359000 | 4.515548000  |
| C | -1.981052000 | -3.510683000 | -2.791750000 | H | -5.709573000 | -0.092609000 | 2.733332000  |

|   |              |              |              |                                        |              |              |              |
|---|--------------|--------------|--------------|----------------------------------------|--------------|--------------|--------------|
| H | -2.754903000 | -3.726858000 | 5.372783000  | <u>2C<sub>3</sub>H<sub>4</sub>@PPX</u> |              |              |              |
| H | -4.227188000 | -1.454389000 | 5.997329000  | Au                                     | 1.837106000  | -3.213615000 | 0.806169000  |
| H | -3.228338000 | 4.187640000  | 1.587048000  | Au                                     | -1.397641000 | -3.304509000 | 0.804036000  |
| H | -2.850034000 | 5.041663000  | 3.109523000  | Au                                     | -4.169534000 | -1.797715000 | -0.890983000 |
| H | -2.664281000 | -5.120724000 | 3.121039000  | Au                                     | 4.382956000  | -1.378888000 | -0.859903000 |
| H | -3.063568000 | -4.281998000 | 1.595565000  | Au                                     | 1.394972000  | 3.331715000  | 0.782463000  |
| H | -1.306896000 | -4.112188000 | -5.999513000 | Au                                     | -1.835103000 | 3.217876000  | 0.758873000  |
| H | -3.831560000 | -3.061624000 | -5.512306000 | Au                                     | -4.392206000 | 1.370868000  | -0.925387000 |
| H | -5.221602000 | -2.933140000 | -3.350866000 | Au                                     | 4.160744000  | 1.772826000  | -0.859173000 |
| H | -4.425389000 | -3.238028000 | -1.781179000 | N                                      | 3.485867000  | -2.842854000 | 3.384508000  |
| H | -4.481964000 | -0.069577000 | -4.342812000 | N                                      | 1.492358000  | -3.660279000 | 3.788564000  |
| H | -4.582502000 | 3.096359000  | -1.774825000 | N                                      | -1.041218000 | -3.756484000 | 3.785184000  |
| H | -5.384209000 | 2.764911000  | -3.338605000 | N                                      | -3.097545000 | -3.114341000 | 3.369297000  |
| H | -1.507690000 | 4.021360000  | -6.023306000 | N                                      | 4.515389000  | -0.491445000 | 1.034788000  |
| H | -4.012160000 | 2.933759000  | -5.512276000 | N                                      | -4.438575000 | -0.907320000 | 0.996360000  |
| H | -0.112681000 | 4.558178000  | 4.120858000  | N                                      | -4.272622000 | -1.487613000 | -3.917495000 |
| H | 0.046875000  | -4.537293000 | 4.150441000  | N                                      | -3.043124000 | -3.214093000 | -3.366178000 |
| H | 0.119286000  | -5.086445000 | -2.584584000 | N                                      | -0.467802000 | -3.459854000 | -1.082510000 |
| H | 0.142660000  | -5.519039000 | -4.322775000 | N                                      | 0.932344000  | -3.399036000 | -1.083163000 |
| H | -0.076338000 | 5.045251000  | -2.627998000 | N                                      | 3.459574000  | -2.892913000 | -3.363373000 |
| H | -0.066191000 | 5.456896000  | -4.370548000 | N                                      | 4.478112000  | -1.024194000 | -3.882236000 |
| H | 4.088157000  | -2.967038000 | -5.429230000 | N                                      | 3.052361000  | 3.123372000  | 3.372028000  |
| C | -1.274335000 | -0.001326000 | -1.177070000 | N                                      | 0.997579000  | 3.787208000  | 3.757352000  |
| C | -0.012720000 | -0.060658000 | -1.578020000 | N                                      | -1.534420000 | 3.726048000  | 3.736207000  |
| H | -1.594203000 | -0.402712000 | -0.212761000 | N                                      | -3.520593000 | 2.896460000  | 3.317724000  |
| C | 1.251326000  | -0.088475000 | -1.973497000 | N                                      | 4.402989000  | 0.907192000  | 1.035919000  |
| H | 1.940812000  | 0.708203000  | -1.692994000 | N                                      | -4.541075000 | 0.491845000  | 0.980986000  |
| H | 1.659628000  | -0.906300000 | -2.568419000 | N                                      | -4.421048000 | 0.976337000  | -3.942452000 |
| H | -2.031660000 | 0.475430000  | -1.797579000 | N                                      | -3.406589000 | 2.847588000  | -3.426004000 |
| C | -1.259016000 | 0.001293000  | 2.886260000  | N                                      | -0.908686000 | 3.394589000  | -1.124718000 |
| C | -0.128906000 | 0.005846000  | 2.190232000  | N                                      | 0.491268000  | 3.449050000  | -1.112934000 |
| H | -1.281064000 | 0.015852000  | 3.980576000  | N                                      | 3.092735000  | 3.175038000  | -3.371351000 |
| C | 0.953666000  | 0.019539000  | 1.426644000  | N                                      | 4.328398000  | 1.440758000  | -3.884206000 |
| H | 1.372230000  | 0.963603000  | 1.069926000  | C                                      | 2.332038000  | -3.245547000 | 2.753925000  |
| H | 1.417686000  | -0.906207000 | 1.079939000  | C                                      | 3.377264000  | -2.970148000 | 4.782094000  |
| H | -2.217335000 | -0.013403000 | 2.362206000  | C                                      | 2.127763000  | -3.488621000 | 5.037352000  |

|   |              |              |              |   |              |              |              |
|---|--------------|--------------|--------------|---|--------------|--------------|--------------|
| C | 0.256663000  | -4.452793000 | 3.595904000  | C | 0.911021000  | 3.907072000  | -2.342113000 |
| C | -1.901732000 | -3.394265000 | 2.745804000  | C | 2.367426000  | 4.221110000  | -2.589300000 |
| C | -2.996935000 | -3.270205000 | 4.765128000  | C | 3.866542000  | 2.188135000  | -2.802801000 |
| C | -1.707641000 | -3.676609000 | 5.027261000  | C | 3.852705000  | 1.977320000  | -5.098785000 |
| C | 4.705548000  | -2.377076000 | 2.657699000  | C | 3.073976000  | 3.065547000  | -4.773609000 |
| C | 4.640981000  | -0.908122000 | 2.337794000  | C | 4.621688000  | 0.219105000  | 3.188026000  |
| C | -4.356544000 | -2.783952000 | 2.633785000  | C | -4.606202000 | -0.192283000 | 3.144755000  |
| C | -4.469553000 | -1.319913000 | 2.304225000  | C | -5.160109000 | -0.303879000 | -3.853032000 |
| C | -3.830493000 | -2.224882000 | -2.821496000 | C | 5.214635000  | 0.257647000  | -3.791262000 |
| C | -3.768919000 | -2.030682000 | -5.117703000 | H | 4.187922000  | -2.725195000 | 5.457223000  |
| C | -2.994260000 | -3.113943000 | -4.768426000 | H | 1.670324000  | -3.777529000 | 5.975541000  |
| C | -2.329385000 | -4.251388000 | -2.564302000 | H | 0.284549000  | -5.281512000 | 4.317024000  |
| C | -0.875142000 | -3.936016000 | -2.305575000 | H | 0.271593000  | -4.858190000 | 2.578992000  |
| C | 0.264112000  | -4.176823000 | -3.110263000 | H | -3.836970000 | -3.123392000 | 5.432969000  |
| C | 1.378896000  | -3.838032000 | -2.310177000 | H | -1.238173000 | -3.946723000 | 5.965174000  |
| C | 2.855613000  | -4.010060000 | -2.575685000 | H | 4.773200000  | -2.954617000 | 1.724637000  |
| C | 4.120783000  | -1.824635000 | -2.799923000 | H | 5.574771000  | -2.613340000 | 3.287852000  |
| C | 4.052908000  | -1.608122000 | -5.093784000 | H | -5.195553000 | -3.116533000 | 3.261845000  |
| C | 3.410171000  | -2.780832000 | -4.764740000 | H | -4.357997000 | -3.369658000 | 1.703260000  |
| C | 1.872817000  | 3.421985000  | 2.731684000  | H | -4.027965000 | -1.641298000 | -6.094440000 |
| C | 2.927177000  | 3.262771000  | 4.767287000  | H | -2.414308000 | -5.203087000 | -3.108826000 |
| C | 1.639760000  | 3.684076000  | 5.011139000  | H | -2.861808000 | -4.347148000 | -1.607313000 |
| C | -0.283953000 | 4.502232000  | 3.549059000  | H | 0.280795000  | -4.587207000 | -4.114938000 |
| C | -2.357143000 | 3.289720000  | 2.696892000  | H | 3.399327000  | -4.065185000 | -1.621940000 |
| C | -3.436701000 | 3.057937000  | 4.713083000  | H | 3.031435000  | -4.939734000 | -3.135503000 |
| C | -2.191441000 | 3.584155000  | 4.977521000  | H | 4.270819000  | -1.177808000 | -6.063408000 |
| C | 4.323688000  | 2.799432000  | 2.656274000  | H | 2.967977000  | -3.540165000 | -5.397299000 |
| C | 4.457415000  | 1.335602000  | 2.338041000  | H | 3.751674000  | 3.094035000  | 5.448952000  |
| C | -4.720495000 | 2.398438000  | 2.579604000  | H | 1.157833000  | 3.951200000  | 5.943569000  |
| C | -4.633479000 | 0.924759000  | 2.280371000  | H | -0.311471000 | 5.337071000  | 4.263078000  |
| C | -4.084768000 | 1.789724000  | -2.863320000 | H | -0.286570000 | 4.898781000  | 2.528547000  |
| C | -3.963554000 | 1.540599000  | -5.151396000 | H | -4.260182000 | 2.832546000  | 5.379678000  |
| C | -3.323554000 | 2.714887000  | -4.823870000 | H | -1.752214000 | 3.900730000  | 5.915608000  |
| C | -2.817454000 | 3.973786000  | -2.642626000 | H | 4.331462000  | 3.379594000  | 1.722273000  |
| C | -1.342860000 | 3.810319000  | -2.360329000 | H | 5.151811000  | 3.143393000  | 3.292589000  |
| C | -0.220472000 | 4.134991000  | -3.158622000 | H | -5.602692000 | 2.631072000  | 3.193098000  |

|                                        |              |              |              |    |              |              |              |
|----------------------------------------|--------------|--------------|--------------|----|--------------|--------------|--------------|
| H                                      | -4.784057000 | 2.960528000  | 1.636739000  | Au | 2.818101000  | 2.946959000  | 0.878705000  |
| H                                      | -4.159521000 | 1.096662000  | -6.119479000 | Au | -0.309055000 | 3.709146000  | 0.831377000  |
| H                                      | -2.862732000 | 3.463077000  | -5.456322000 | Au | -3.315291000 | 2.643635000  | -0.860766000 |
| H                                      | -2.992501000 | 4.898459000  | -3.211348000 | Au | 4.512180000  | 0.298543000  | -0.794239000 |
| H                                      | -3.370747000 | 4.033486000  | -1.694719000 | N  | 1.990943000  | -3.768236000 | 3.425784000  |
| H                                      | -0.229090000 | 4.528509000  | -4.170095000 | N  | -0.152123000 | -3.964699000 | 3.850413000  |
| H                                      | 2.890360000  | 4.328305000  | -1.628295000 | N  | -2.576479000 | -3.268779000 | 3.836249000  |
| H                                      | 2.457164000  | 5.165780000  | -3.144810000 | N  | -4.244976000 | -1.921445000 | 3.377599000  |
| H                                      | 4.131581000  | 1.580738000  | -6.067206000 | N  | 3.849900000  | -1.900079000 | 1.084548000  |
| H                                      | 2.554335000  | 3.771835000  | -5.408742000 | N  | -4.449757000 | 0.615252000  | 1.002583000  |
| H                                      | 4.709447000  | 0.225755000  | 4.268800000  | N  | -4.426854000 | 0.077324000  | -3.893652000 |
| H                                      | -4.683691000 | -0.186280000 | 4.226486000  | N  | -4.113719000 | -2.027274000 | -3.380365000 |
| H                                      | -5.709154000 | -0.327472000 | -2.905424000 | N  | -1.956815000 | -3.328121000 | -1.036760000 |
| H                                      | -5.862712000 | -0.354995000 | -4.695688000 | N  | -0.606077000 | -3.693555000 | -1.034557000 |
| H                                      | 5.744458000  | 0.290857000  | -2.833023000 | N  | 1.994794000  | -3.783371000 | -3.332476000 |
| H                                      | 5.933647000  | 0.300879000  | -4.620287000 | N  | 3.613934000  | -2.385984000 | -3.814668000 |
| H                                      | -2.459031000 | -3.822925000 | -5.387335000 | N  | 4.154258000  | 1.967729000  | 3.463093000  |
| C                                      | -1.301555000 | -0.022859000 | -0.159196000 | N  | 2.491230000  | 3.333908000  | 3.875259000  |
| C                                      | -0.194004000 | -0.010709000 | -0.689623000 | N  | 0.061500000  | 3.991183000  | 3.835258000  |
| H                                      | -2.230261000 | -0.023656000 | 0.359693000  | N  | -2.068456000 | 3.758548000  | 3.361983000  |
| C                                      | 1.169465000  | 0.016043000  | -1.223901000 | N  | 4.363895000  | -0.598715000 | 1.090316000  |
| H                                      | 1.882265000  | 0.018803000  | -0.384008000 | N  | -3.912687000 | 1.906170000  | 1.005219000  |
| H                                      | 1.386101000  | -0.872677000 | -1.837214000 | N  | -3.532530000 | 2.389938000  | -3.883944000 |
| H                                      | 1.352234000  | 0.928641000  | -1.813471000 | N  | -1.921225000 | 3.779274000  | -3.363003000 |
| C                                      | 1.292321000  | -0.081170000 | 2.294674000  | N  | 0.649342000  | 3.636574000  | -1.039571000 |
| C                                      | 0.159751000  | 0.039300000  | 2.755104000  | N  | 2.007436000  | 3.293490000  | -1.022174000 |
| H                                      | 2.246934000  | -0.214467000 | 1.840753000  | N  | 4.218451000  | 2.026814000  | -3.318826000 |
| C                                      | -1.221251000 | 0.179901000  | 3.237521000  | N  | 4.541993000  | -0.081578000 | -3.810781000 |
| H                                      | -1.272329000 | 0.777979000  | 4.162595000  | C  | 0.766875000  | -3.851330000 | 2.804034000  |
| H                                      | -1.836445000 | 0.677729000  | 2.473396000  | C  | 1.859202000  | -3.813212000 | 4.826279000  |
| H                                      | -1.669130000 | -0.805364000 | 3.436245000  | C  | 0.514712000  | -3.941166000 | 5.094857000  |
| <u>2C<sub>3</sub>H<sub>6</sub>@PPX</u> |              |              |              | C  | -1.576656000 | -4.352222000 | 3.690217000  |
| Au                                     | 0.306703000  | -3.752892000 | 0.849860000  | C  | -3.264233000 | -2.675825000 | 2.775732000  |
| Au                                     | -2.788200000 | -2.878138000 | 0.835305000  | C  | -4.180675000 | -2.022557000 | 4.780215000  |
| Au                                     | -4.552754000 | -0.294075000 | -0.879230000 | C  | -3.137215000 | -2.872945000 | 5.070587000  |
| Au                                     | 3.315946000  | -2.641538000 | -0.802978000 | C  | 3.288186000  | -3.726100000 | 2.687792000  |



|   |              |              |              |   |              |              |              |
|---|--------------|--------------|--------------|---|--------------|--------------|--------------|
| C | 3.758113000  | -2.328303000 | 2.384227000  | C | 4.215580000  | -1.302903000 | 3.242109000  |
| C | -5.248110000 | -1.109282000 | 2.620937000  | C | -4.376589000 | 1.340322000  | 3.151718000  |
| C | -4.723614000 | 0.266187000  | 2.300983000  | C | -4.732366000 | 1.521058000  | -3.808278000 |
| C | -4.395971000 | -0.804834000 | -2.815938000 | C | 4.821484000  | -1.529879000 | -3.706418000 |
| C | -4.175024000 | -0.604677000 | -5.102297000 | H | 2.710244000  | -3.792172000 | 5.495715000  |
| C | -3.973481000 | -1.926581000 | -4.776166000 | H | -0.000726000 | -4.055999000 | 6.040522000  |
| C | -3.910895000 | -3.282262000 | -2.598539000 | H | -1.796514000 | -5.109379000 | 4.455344000  |
| C | -2.455521000 | -3.543419000 | -2.297376000 | H | -1.696948000 | -4.794959000 | 2.695945000  |
| C | -1.424517000 | -4.051722000 | -3.120166000 | H | -4.886239000 | -1.527069000 | 5.435647000  |
| C | -0.280587000 | -4.134171000 | -2.295068000 | H | -2.786864000 | -3.247927000 | 6.024355000  |
| C | 1.088832000  | -4.699307000 | -2.573109000 | H | 3.147991000  | -4.277394000 | 1.747117000  |
| C | 2.956088000  | -2.992526000 | -2.745562000 | H | 4.027225000  | -4.261692000 | 3.301640000  |
| C | 3.052744000  | -2.802093000 | -5.040138000 | H | -6.160640000 | -1.061940000 | 3.232149000  |
| C | 2.034387000  | -3.677318000 | -4.734571000 | H | -5.470505000 | -1.645609000 | 1.687419000  |
| C | 3.212210000  | 2.748534000  | 2.835884000  | H | -4.200882000 | -0.118355000 | -6.069437000 |
| C | 4.036768000  | 2.049102000  | 4.862940000  | H | -4.338785000 | -4.109705000 | -3.182514000 |
| C | 2.994965000  | 2.911875000  | 5.124208000  | H | -4.474953000 | -3.182197000 | -1.660518000 |
| C | 1.481117000  | 4.402578000  | 3.702559000  | H | -1.504858000 | -4.353275000 | -4.159352000 |
| C | -0.828721000 | 3.838202000  | 2.769425000  | H | 1.591276000  | -4.934186000 | -1.624176000 |
| C | -1.970716000 | 3.836660000  | 4.763818000  | H | 1.002263000  | -5.625079000 | -3.160415000 |
| C | -0.635434000 | 3.986302000  | 5.063081000  | H | 3.438681000  | -2.486750000 | -6.001629000 |
| C | 5.143338000  | 1.126014000  | 2.726030000  | H | 1.380303000  | -4.246329000 | -5.383212000 |
| C | 4.583583000  | -0.233569000 | 2.394323000  | H | 4.708061000  | 1.533103000  | 5.538236000  |
| C | -3.355798000 | 3.732187000  | 2.602743000  | H | 2.610799000  | 3.277435000  | 6.068525000  |
| C | -3.862736000 | 2.346703000  | 2.302980000  | H | 1.672711000  | 5.167367000  | 4.467814000  |
| C | -2.902266000 | 2.995428000  | -2.797813000 | H | 1.616691000  | 4.840898000  | 2.708146000  |
| C | -2.939770000 | 2.802068000  | -5.095358000 | H | -2.837905000 | 3.821069000  | 5.412338000  |
| C | -1.925533000 | 3.672997000  | -4.765822000 | H | -0.145547000 | 4.128738000  | 6.018517000  |
| C | -1.019565000 | 4.676563000  | -2.582066000 | H | 5.404552000  | 1.654421000  | 1.798061000  |
| C | 0.344127000  | 4.098340000  | -2.297561000 | H | 6.041863000  | 1.044219000  | 3.354357000  |
| C | 1.504945000  | 4.042233000  | -3.104031000 | H | -4.089955000 | 4.294106000  | 3.198762000  |
| C | 2.527260000  | 3.534288000  | -2.270376000 | H | -3.186897000 | 4.270709000  | 1.659389000  |
| C | 3.990054000  | 3.286218000  | -2.549014000 | H | -3.303759000 | 2.487208000  | -6.065465000 |
| C | 4.466056000  | 0.804265000  | -2.738544000 | H | -1.254524000 | 4.240577000  | -5.398178000 |
| C | 4.350674000  | 0.597999000  | -5.031895000 | H | -0.919290000 | 5.612131000  | -3.151429000 |
| C | 4.143270000  | 1.922471000  | -4.719804000 | H | -1.529125000 | 4.897375000  | -1.633755000 |

|                             |              |              |              |    |              |              |              |
|-----------------------------|--------------|--------------|--------------|----|--------------|--------------|--------------|
| H                           | 1.601606000  | 4.365582000  | -4.135357000 | Au | -2.177832000 | -3.066323000 | -1.156217000 |
| H                           | 4.541584000  | 3.197728000  | -1.602338000 | Au | -4.354296000 | -0.949286000 | 0.641557000  |
| H                           | 4.418217000  | 4.113600000  | -3.132557000 | Au | 3.746273000  | -2.200688000 | 0.693529000  |
| H                           | 4.420492000  | 0.108486000  | -5.995367000 | N  | 3.810712000  | 2.803318000  | -3.254047000 |
| H                           | 3.994809000  | 2.780791000  | -5.363010000 | N  | 2.012143000  | 4.004151000  | -3.599904000 |
| H                           | 4.299344000  | -1.340688000 | 4.322860000  | N  | -0.476098000 | 4.357495000  | -3.598853000 |
| H                           | -4.492089000 | 1.386755000  | 4.229157000  | N  | -2.561939000 | 3.781257000  | -3.256743000 |
| H                           | -5.247537000 | 1.716750000  | -2.861578000 | N  | 4.334326000  | 0.118493000  | -1.055237000 |
| H                           | -5.389134000 | 1.782989000  | -4.648890000 | N  | -4.045649000 | 1.434904000  | -1.088860000 |
| H                           | 5.302571000  | -1.724959000 | -2.741946000 | N  | -4.062145000 | 1.572896000  | 3.855693000  |
| H                           | 5.502158000  | -1.806143000 | -4.523054000 | N  | -2.649746000 | 3.209672000  | 3.502166000  |
| H                           | -3.785701000 | -2.785338000 | -5.408182000 | N  | -0.051988000 | 3.483546000  | 1.247751000  |
| C                           | -1.121196000 | -0.226799000 | -1.796829000 | N  | 1.338754000  | 3.309526000  | 1.237518000  |
| C                           | 0.191216000  | -0.538334000 | -1.889081000 | N  | 3.750147000  | 2.359691000  | 3.504770000  |
| H                           | -1.807016000 | -0.863654000 | -1.243879000 | N  | 4.461767000  | 0.326701000  | 3.894918000  |
| H                           | -1.531552000 | 0.681161000  | -2.248578000 | N  | 2.682347000  | -3.297774000 | -3.643691000 |
| C                           | 1.232346000  | 0.330911000  | -2.556721000 | N  | 0.612095000  | -3.822064000 | -4.128112000 |
| H                           | 0.557025000  | -1.447775000 | -1.402080000 | N  | -1.870664000 | -3.445510000 | -4.157778000 |
| H                           | 1.890576000  | -0.258834000 | -3.215640000 | N  | -3.684925000 | -2.301813000 | -3.712905000 |
| H                           | 0.768971000  | 1.142172000  | -3.141193000 | N  | 4.075165000  | -1.253971000 | -1.144212000 |
| H                           | 1.870856000  | 0.795624000  | -1.787593000 | N  | -4.302873000 | 0.064448000  | -1.191961000 |
| C                           | -1.328987000 | 0.198286000  | 1.645037000  | N  | -4.608119000 | -0.837772000 | 3.675512000  |
| C                           | -0.149263000 | -0.415433000 | 1.890235000  | N  | -3.876819000 | -2.800936000 | 3.038525000  |
| H                           | -2.231054000 | -0.071812000 | 2.188851000  | N  | -1.376107000 | -3.387505000 | 0.757375000  |
| H                           | -1.417254000 | 0.968289000  | 0.876232000  | N  | 0.016213000  | -3.558200000 | 0.779843000  |
| C                           | 1.136351000  | -0.082695000 | 1.171729000  | N  | 2.548596000  | -3.650367000 | 3.108151000  |
| H                           | -0.101429000 | -1.207925000 | 2.647038000  | N  | 3.956131000  | -2.092864000 | 3.731180000  |
| H                           | 1.510875000  | -0.955099000 | 0.616574000  | C  | 2.726568000  | 3.342417000  | -2.603133000 |
| H                           | 0.980216000  | 0.735547000  | 0.453935000  | C  | 3.784109000  | 3.101405000  | -4.629118000 |
| H                           | 1.926861000  | 0.209394000  | 1.882398000  | C  | 2.655153000  | 3.860402000  | -4.848164000 |
| <u>2(1,2-butadiene)@PPX</u> |              |              |              | C  | 0.873018000  | 4.915085000  | -3.347212000 |
| Au                          | 2.196949000  | 3.192805000  | -0.676133000 | C  | -1.364051000 | 3.949578000  | -2.602902000 |
| Au                          | -0.918000000 | 3.646324000  | -0.667693000 | C  | -2.440031000 | 4.054304000  | -4.631588000 |
| Au                          | -3.772569000 | 2.118757000  | 0.869509000  | C  | -1.130182000 | 4.420509000  | -4.848374000 |
| Au                          | 4.340163000  | 0.867585000  | 0.900634000  | C  | 4.884267000  | 2.042948000  | -2.549037000 |
| Au                          | 0.938946000  | -3.447991000 | -1.115948000 | C  | 4.526110000  | 0.597750000  | -2.327076000 |

|   |              |              |              |   |              |              |              |
|---|--------------|--------------|--------------|---|--------------|--------------|--------------|
| C | -3.834738000 | 3.440716000  | -2.555140000 | C | -4.271006000 | 0.930848000  | -3.289117000 |
| C | -4.024738000 | 1.961926000  | -2.354583000 | C | -5.116804000 | 0.552136000  | 3.658171000  |
| C | -3.504633000 | 2.354132000  | 2.845317000  | C | 4.996446000  | -1.040247000 | 3.711956000  |
| C | -3.550867000 | 1.951529000  | 5.114401000  | H | 4.565772000  | 2.791612000  | -5.311845000 |
| C | -2.661263000 | 2.978172000  | 4.889511000  | H | 2.291726000  | 4.326909000  | -5.755566000 |
| C | -1.847131000 | 4.263802000  | 2.813831000  | H | 0.996434000  | 5.790068000  | -3.999782000 |
| C | -0.423595000 | 3.864460000  | 2.516616000  | H | 0.917747000  | 5.230005000  | -2.299050000 |
| C | 0.727846000  | 3.931155000  | 3.333592000  | H | -3.278120000 | 4.004628000  | -5.315747000 |
| C | 1.814716000  | 3.587904000  | 2.496948000  | H | -0.637307000 | 4.748977000  | -5.755202000 |
| C | 3.296918000  | 3.585638000  | 2.783555000  | H | 5.051015000  | 2.530162000  | -1.577455000 |
| C | 4.212883000  | 1.231057000  | 2.868649000  | H | 5.799421000  | 2.132388000  | -3.151828000 |
| C | 4.154700000  | 0.898763000  | 5.145871000  | H | -4.656695000 | 3.865034000  | -3.150108000 |
| C | 3.704275000  | 2.176675000  | 4.898728000  | H | -3.813354000 | 3.941687000  | -1.576629000 |
| C | 1.458588000  | -3.528525000 | -3.058336000 | H | -3.879209000 | 1.501050000  | 6.042784000  |
| C | 2.616028000  | -3.422792000 | -5.043855000 | H | -1.859983000 | 5.156274000  | 3.455938000  |
| C | 1.315647000  | -3.755516000 | -5.350415000 | H | -2.363707000 | 4.500468000  | 1.872679000  |
| C | -0.747199000 | -4.393716000 | -3.993844000 | H | 0.773734000  | 4.229599000  | 4.375932000  |
| C | -2.625453000 | -2.931660000 | -3.105524000 | H | 3.857390000  | 3.636917000  | 1.839267000  |
| C | -3.604278000 | -2.399403000 | -5.114092000 | H | 3.565879000  | 4.452958000  | 3.403070000  |
| C | -2.466003000 | -3.122683000 | -5.396428000 | H | 4.315537000  | 0.383362000  | 6.084567000  |
| C | 3.928875000  | -3.050435000 | -2.862832000 | H | 3.402021000  | 2.959730000  | 5.582730000  |
| C | 4.107760000  | -1.609840000 | -2.468453000 | H | 3.481385000  | -3.305674000 | -5.684549000 |
| C | -4.786171000 | -1.645007000 | -2.948394000 | H | 0.858519000  | -3.982650000 | -6.305745000 |
| C | -4.441198000 | -0.243534000 | -2.521856000 | H | -0.854844000 | -5.173568000 | -4.759964000 |
| C | -4.281125000 | -1.581476000 | 2.544502000  | H | -0.826761000 | -4.844547000 | -2.998839000 |
| C | -4.423573000 | -1.604400000 | 4.844788000  | H | -4.358840000 | -1.990647000 | -5.774806000 |
| C | -3.961929000 | -2.837381000 | 4.441083000  | H | -2.066208000 | -3.454065000 | -6.346940000 |
| C | -3.377351000 | -3.913413000 | 2.174974000  | H | 3.877840000  | -3.671429000 | -1.956756000 |
| C | -1.886904000 | -3.868704000 | 1.940949000  | H | 4.772635000  | -3.394784000 | -3.478308000 |
| C | -0.824721000 | -4.353088000 | 2.734571000  | H | -5.679290000 | -1.653161000 | -3.589693000 |
| C | 0.349897000  | -4.147994000 | 1.976713000  | H | -4.984034000 | -2.260005000 | -2.058377000 |
| C | 1.763871000  | -4.591396000 | 2.254865000  | H | -4.665170000 | -1.236396000 | 5.834189000  |
| C | 3.422515000  | -2.714482000 | 2.606429000  | H | -3.725309000 | -3.721649000 | 5.018826000  |
| C | 3.409965000  | -2.644600000 | 4.907167000  | H | -3.658729000 | -4.858671000 | 2.660141000  |
| C | 2.523473000  | -3.621788000 | 4.513038000  | H | -3.904226000 | -3.838257000 | 1.213137000  |
| C | 4.390035000  | -0.465720000 | -3.247803000 | H | -0.897745000 | -4.822679000 | 3.709760000  |

|                             |              |              |              |    |              |              |              |
|-----------------------------|--------------|--------------|--------------|----|--------------|--------------|--------------|
| H                           | 2.309736000  | -4.698050000 | 1.306816000  | Au | -2.700704000 | -2.964072000 | 0.783130000  |
| H                           | 1.755340000  | -5.565112000 | 2.765495000  | Au | 0.324132000  | -3.933986000 | 0.829272000  |
| H                           | 3.716650000  | -2.336857000 | 5.899060000  | Au | 3.255944000  | -2.609246000 | -0.790670000 |
| H                           | 1.922972000  | -4.303794000 | 5.101288000  | Au | -4.356373000 | -0.321396000 | -0.952945000 |
| H                           | 4.511210000  | -0.419556000 | -4.324732000 | N  | -2.114705000 | 3.799554000  | 3.381868000  |
| H                           | -4.352854000 | 1.027018000  | -4.366516000 | N  | 0.003586000  | 4.082242000  | 3.870867000  |
| H                           | -5.597981000 | 0.735534000  | 2.691340000  | N  | 2.419308000  | 3.412948000  | 3.911285000  |
| H                           | -5.851737000 | 0.656425000  | 4.467631000  | N  | 4.052285000  | 2.016561000  | 3.485056000  |
| H                           | 5.517605000  | -1.083954000 | 2.749386000  | N  | -3.733423000 | 1.837045000  | 0.984862000  |
| H                           | 5.702391000  | -1.243377000 | 4.528601000  | N  | 4.215666000  | -0.547024000 | 1.116283000  |
| H                           | -2.079503000 | 3.567525000  | 5.586909000  | N  | 4.528714000  | -0.047832000 | -3.785527000 |
| C                           | -0.095184000 | 0.146383000  | -0.702001000 | N  | 4.147707000  | 2.055856000  | -3.312537000 |
| C                           | 0.774078000  | 0.166796000  | -1.707326000 | N  | 1.931497000  | 3.361795000  | -1.002530000 |
| C                           | 0.417240000  | 0.551957000  | -3.139707000 | N  | 0.580466000  | 3.738665000  | -1.019107000 |
| C                           | -0.930131000 | 0.140235000  | 0.325908000  | N  | -1.969457000 | 3.886495000  | -3.382384000 |
| H                           | 0.993469000  | 1.440522000  | -3.449856000 | N  | -3.534600000 | 2.453006000  | -3.919562000 |
| H                           | -0.656117000 | 0.783179000  | -3.227198000 | N  | -4.205910000 | -2.057889000 | 3.300744000  |
| H                           | 0.665691000  | -0.269168000 | -3.836981000 | N  | -2.595804000 | -3.463351000 | 3.782490000  |
| H                           | -1.063103000 | 1.030176000  | 0.944909000  | N  | -0.174439000 | -4.121998000 | 3.823054000  |
| H                           | 1.815218000  | -0.099587000 | -1.501635000 | N  | 1.960551000  | -3.822327000 | 3.423852000  |
| H                           | -1.473337000 | -0.760488000 | 0.618582000  | N  | -4.216534000 | 0.524486000  | 0.959889000  |
| C                           | 0.195100000  | -0.536488000 | 3.370116000  | N  | 3.724626000  | -1.857124000 | 1.108202000  |
| C                           | -0.832207000 | -1.042916000 | 4.044327000  | N  | 3.680678000  | -2.390981000 | -3.798034000 |
| C                           | -0.719006000 | -1.811118000 | 5.359155000  | N  | 2.100589000  | -3.842177000 | -3.358108000 |
| C                           | 1.190538000  | -0.010449000 | 2.668882000  | N  | -0.528115000 | -3.781844000 | -1.078231000 |
| H                           | -1.322347000 | -1.328887000 | 6.148345000  | N  | -1.868487000 | -3.373855000 | -1.100252000 |
| H                           | 0.326231000  | -1.859600000 | 5.699709000  | N  | -3.986823000 | -1.996440000 | -3.486244000 |
| H                           | -1.098357000 | -2.841364000 | 5.238187000  | N  | -4.348503000 | 0.108902000  | -3.965075000 |
| H                           | 1.520236000  | 1.017365000  | 2.832586000  | C  | -0.875550000 | 3.920229000  | 2.798392000  |
| H                           | -1.841029000 | -0.898681000 | 3.637906000  | C  | -2.029117000 | 3.865183000  | 4.784247000  |
| H                           | 1.676978000  | -0.557031000 | 1.856924000  | C  | -0.699532000 | 4.047178000  | 5.094101000  |
| <u>2(1,3-butadiene)@PPX</u> |              |              |              | C  | 1.423507000  | 4.494043000  | 3.748235000  |
| Au                          | -0.355294000 | 3.822798000  | 0.859829000  | C  | 3.126860000  | 2.821144000  | 2.866190000  |
| Au                          | 2.730436000  | 3.031104000  | 0.910737000  | C  | 3.936646000  | 2.086646000  | 4.885061000  |
| Au                          | 4.358608000  | 0.342734000  | -0.775940000 | C  | 2.913629000  | 2.968407000  | 5.156088000  |
| Au                          | -3.268212000 | 2.649309000  | -0.892550000 | C  | -3.388894000 | 3.698722000  | 2.606625000  |

|   |              |              |              |   |              |              |              |
|---|--------------|--------------|--------------|---|--------------|--------------|--------------|
| C | -3.785679000 | 2.284674000  | 2.281120000  | C | -4.304381000 | 1.260727000  | 3.104250000  |
| C | 5.029397000  | 1.164814000  | 2.743039000  | C | 4.146987000  | -1.281322000 | 3.261287000  |
| C | 4.467789000  | -0.194551000 | 2.417080000  | C | 4.845357000  | -1.486592000 | -3.654259000 |
| C | 4.354370000  | 0.831349000  | -2.720777000 | C | -4.698833000 | 1.541208000  | -3.847021000 |
| C | 4.438047000  | 0.637087000  | -5.014115000 | H | -2.899724000 | 3.818889000  | 5.426686000  |
| C | 4.194991000  | 1.959670000  | -4.715224000 | H | -0.218888000 | 4.192608000  | 6.053781000  |
| C | 3.906943000  | 3.311542000  | -2.541725000 | H | 1.616106000  | 5.248706000  | 4.522910000  |
| C | 2.445990000  | 3.563187000  | -2.260681000 | H | 1.563372000  | 4.940878000  | 2.758410000  |
| C | 1.428645000  | 4.076522000  | -3.097413000 | H | 4.596322000  | 1.548786000  | 5.554560000  |
| C | 0.276195000  | 4.179952000  | -2.284833000 | H | 2.537614000  | 3.333172000  | 6.103968000  |
| C | -1.077574000 | 4.775047000  | -2.583305000 | H | -3.249547000 | 4.263604000  | 1.673930000  |
| C | -2.917746000 | 3.057310000  | -2.827065000 | H | -4.168291000 | 4.193868000  | 3.203781000  |
| C | -2.967660000 | 2.911353000  | -5.127053000 | H | 5.931995000  | 1.082117000  | 3.365465000  |
| C | -1.981857000 | 3.810025000  | -4.787312000 | H | 5.286816000  | 1.690060000  | 1.812147000  |
| C | -3.210773000 | -2.804505000 | 2.718126000  | H | 4.585930000  | 0.152210000  | -5.971223000 |
| C | -4.224410000 | -2.228359000 | 4.696480000  | H | 4.334575000  | 4.142041000  | -3.121381000 |
| C | -3.215698000 | -3.115430000 | 5.001870000  | H | 4.456236000  | 3.222996000  | -1.593504000 |
| C | -1.585412000 | -4.538117000 | 3.645481000  | H | 1.523649000  | 4.370506000  | -4.137453000 |
| C | 0.754201000  | -3.998612000 | 2.789506000  | H | -1.598214000 | 4.996109000  | -1.640928000 |
| C | 1.805612000  | -3.818522000 | 4.821919000  | H | -0.959704000 | 5.712657000  | -3.145834000 |
| C | 0.465463000  | -4.010149000 | 5.075085000  | H | -3.326433000 | 2.601412000  | -6.100725000 |
| C | -5.140652000 | -1.187321000 | 2.524939000  | H | -1.333984000 | 4.411171000  | -5.412755000 |
| C | -4.560433000 | 0.172633000  | 2.240917000  | H | -4.954154000 | -1.747210000 | 5.335961000  |
| C | 3.265680000  | -3.719913000 | 2.703780000  | H | -2.924781000 | -3.543346000 | 5.953389000  |
| C | 3.683059000  | -2.304364000 | 2.404705000  | H | -1.807052000 | -5.298999000 | 4.406201000  |
| C | 2.991582000  | -2.990398000 | -2.745301000 | H | -1.686507000 | -4.978325000 | 2.647737000  |
| C | 3.208051000  | -2.869564000 | -5.036686000 | H | 2.641479000  | -3.720818000 | 5.503326000  |
| C | 2.213062000  | -3.779964000 | -4.759119000 | H | -0.060453000 | -4.109899000 | 6.016505000  |
| C | 1.185782000  | -4.756593000 | -2.613393000 | H | -5.357646000 | -1.699301000 | 1.576330000  |
| C | -0.177723000 | -4.171863000 | -2.347249000 | H | -6.070590000 | -1.107312000 | 3.105803000  |
| C | -1.294968000 | -4.018628000 | -3.199787000 | H | 4.018746000  | -4.222303000 | 3.328516000  |
| C | -2.337668000 | -3.522576000 | -2.383059000 | H | 3.163284000  | -4.276856000 | 1.761665000  |
| C | -3.785667000 | -3.255083000 | -2.712538000 | H | 3.630103000  | -2.563325000 | -5.985914000 |
| C | -4.268750000 | -0.784029000 | -2.900782000 | H | 1.623469000  | -4.399924000 | -5.422896000 |
| C | -4.122210000 | -0.555537000 | -5.188571000 | H | 1.096171000  | -5.680035000 | -3.203737000 |
| C | -3.890873000 | -1.878702000 | -4.885136000 | H | 1.674010000  | -4.997333000 | -1.658413000 |

|                         |              |              |              |    |              |              |              |
|-------------------------|--------------|--------------|--------------|----|--------------|--------------|--------------|
| H                       | -1.355188000 | -4.274240000 | -4.252495000 | Au | 1.452052000  | 3.323183000  | -0.812107000 |
| H                       | -4.366218000 | -3.165412000 | -1.783354000 | Au | -4.393296000 | 1.443755000  | 0.970764000  |
| H                       | -4.199350000 | -4.081056000 | -3.309035000 | Au | -4.221303000 | -1.740288000 | 0.958482000  |
| H                       | -4.181517000 | -0.058201000 | -6.148661000 | Au | -1.461730000 | -3.275768000 | -0.759579000 |
| H                       | -3.712084000 | -2.726801000 | -5.534153000 | Au | -1.791945000 | 3.224356000  | -0.750203000 |
| H                       | -4.489130000 | 1.307075000  | 4.171941000  | N  | 3.200021000  | 3.126246000  | 3.315291000  |
| H                       | 4.261816000  | -1.330431000 | 4.338753000  | N  | 4.454147000  | 1.401856000  | 3.813279000  |
| H                       | 5.293065000  | -1.654884000 | -2.668960000 | N  | 4.561078000  | -1.058327000 | 3.821913000  |
| H                       | 5.569900000  | -1.746250000 | -4.437886000 | N  | 3.464726000  | -2.890540000 | 3.336910000  |
| H                       | -5.204244000 | 1.698019000  | -2.887760000 | N  | 0.565640000  | 3.435195000  | 1.091899000  |
| H                       | -5.379060000 | 1.795168000  | -4.671336000 | N  | 0.888815000  | -3.386591000 | 1.102615000  |
| H                       | 4.094209000  | 2.819454000  | -5.365852000 | N  | 1.366741000  | -3.718944000 | -3.769572000 |
| C                       | 0.469211000  | 0.316048000  | 2.106082000  | N  | 3.370004000  | -2.902324000 | -3.409887000 |
| C                       | -0.458946000 | -0.500258000 | 2.892663000  | N  | 4.544439000  | -0.545813000 | -1.094666000 |
| C                       | -1.156486000 | -0.048053000 | 3.972185000  | N  | 4.466667000  | 0.857231000  | -1.101574000 |
| C                       | 1.112581000  | -0.167727000 | 1.010503000  | N  | 3.060185000  | 3.078713000  | -3.429267000 |
| H                       | 0.599177000  | 1.365450000  | 2.396991000  | N  | 1.005846000  | 3.763433000  | -3.782235000 |
| H                       | -0.594689000 | -1.533202000 | 2.548016000  | N  | -3.329142000 | 2.904704000  | 3.448955000  |
| H                       | -1.043859000 | 0.981400000  | 4.327582000  | N  | -4.388785000 | 1.066169000  | 3.990300000  |
| H                       | -1.845568000 | -0.688056000 | 4.525715000  | N  | -4.279755000 | -1.395608000 | 3.982836000  |
| H                       | 1.758969000  | 0.445379000  | 0.389283000  | N  | -3.064333000 | -3.131753000 | 3.432147000  |
| H                       | 0.986660000  | -1.200806000 | 0.687868000  | N  | -0.834520000 | 3.399261000  | 1.117746000  |
| C                       | 0.472736000  | 0.386448000  | -2.880507000 | N  | -0.511653000 | -3.425760000 | 1.117858000  |
| C                       | -0.441774000 | -0.346575000 | -2.002568000 | N  | -1.164411000 | -3.823267000 | -3.733799000 |
| C                       | -0.961278000 | 0.195947000  | -0.866706000 | N  | -3.200604000 | -3.131144000 | -3.302673000 |
| C                       | 1.049184000  | -0.148150000 | -3.994200000 | N  | -4.488834000 | -0.856696000 | -0.933201000 |
| H                       | 0.696001000  | 1.420972000  | -2.599612000 | N  | -4.567831000 | 0.544367000  | -0.928113000 |
| H                       | -0.673284000 | -1.379016000 | -2.276564000 | N  | -3.513893000 | 2.933092000  | -3.291642000 |
| H                       | -0.724895000 | 1.222374000  | -0.579155000 | N  | -1.525801000 | 3.746871000  | -3.731809000 |
| H                       | -1.598133000 | -0.367274000 | -0.185805000 | C  | 3.970282000  | 2.143103000  | 2.737625000  |
| H                       | 1.720947000  | 0.433157000  | -4.628877000 | C  | 3.200467000  | 3.017899000  | 4.717284000  |
| H                       | 0.839932000  | -1.178810000 | -4.298612000 | C  | 3.990004000  | 1.935174000  | 5.033204000  |
| <u>2(1-butyn)e)@PPX</u> |              |              |              | C  | 5.322143000  | 0.206948000  | 3.710431000  |
| Au                      | 4.240525000  | 1.720939000  | 0.792020000  | C  | 4.147769000  | -1.848751000 | 2.752144000  |
| Au                      | 4.388560000  | -1.415953000 | 0.805707000  | C  | 3.449897000  | -2.769099000 | 4.737732000  |
| Au                      | 1.775964000  | -3.261859000 | -0.798049000 | C  | 4.140687000  | -1.618662000 | 5.045538000  |

|   |              |              |              |   |              |              |              |
|---|--------------|--------------|--------------|---|--------------|--------------|--------------|
| C | 2.468040000  | 4.174017000  | 2.543925000  | C | -3.453700000 | 3.120096000  | -4.685295000 |
| C | 1.005080000  | 3.875058000  | 2.319980000  | C | -0.114350000 | 4.113316000  | 3.150098000  |
| C | 2.820843000  | -4.001404000 | 2.574463000  | C | 0.233585000  | -4.113702000 | 3.151095000  |
| C | 1.343557000  | -3.805359000 | 2.332276000  | C | 0.136235000  | -4.514298000 | -3.548825000 |
| C | 2.232671000  | -3.309546000 | -2.753904000 | C | -0.260734000 | 4.500612000  | -3.556275000 |
| C | 1.972009000  | -3.540473000 | -5.032892000 | H | 2.686253000  | 3.722526000  | 5.358590000  |
| C | 3.227124000  | -3.022464000 | -4.805099000 | H | 4.284289000  | 1.541091000  | 5.997998000  |
| C | 4.608433000  | -2.446505000 | -2.710494000 | H | 6.055093000  | 0.241521000  | 4.527403000  |
| C | 4.577560000  | -0.974308000 | -2.398373000 | H | 5.836763000  | 0.226602000  | 2.743688000  |
| C | 4.532710000  | 0.146198000  | -3.255491000 | H | 2.996436000  | -3.509731000 | 5.384279000  |
| C | 4.450057000  | 1.273098000  | -2.408183000 | H | 4.396025000  | -1.191417000 | 6.007282000  |
| C | 4.337159000  | 2.737749000  | -2.732834000 | H | 2.974203000  | 4.272136000  | 1.573238000  |
| C | 1.897905000  | 3.400917000  | -2.769889000 | H | 2.576562000  | 5.120279000  | 3.093448000  |
| C | 1.622184000  | 3.636702000  | -5.047152000 | H | 2.988604000  | -4.928266000 | 3.141556000  |
| C | 2.909164000  | 3.202289000  | -4.823352000 | H | 3.345485000  | -4.079249000 | 1.611782000  |
| C | -4.049106000 | 1.865969000  | 2.902219000  | H | 1.493288000  | -3.826522000 | -5.961309000 |
| C | -3.224649000 | 2.773840000  | 4.845539000  | H | 5.461398000  | -2.699883000 | -3.356605000 |
| C | -3.892754000 | 1.620019000  | 5.188683000  | H | 4.689286000  | -3.019194000 | -1.775381000 |
| C | -5.152011000 | -0.200753000 | 3.918416000  | H | 4.554411000  | 0.142501000  | -4.339572000 |
| C | -3.859734000 | -2.148253000 | 2.888858000  | H | 4.370893000  | 3.322459000  | -1.802216000 |
| C | -2.989593000 | -3.013551000 | 4.831764000  | H | 5.160244000  | 3.064280000  | -3.385019000 |
| C | -3.755492000 | -1.924061000 | 5.180741000  | H | 1.125707000  | 3.898779000  | -5.973335000 |
| C | -2.718813000 | 4.009584000  | 2.652841000  | H | 3.717957000  | 3.015182000  | -5.518930000 |
| C | -1.249856000 | 3.812570000  | 2.360560000  | H | -2.731398000 | 3.510610000  | 5.466824000  |
| C | -2.364824000 | -4.178184000 | 2.630920000  | H | -4.084829000 | 1.185442000  | 6.161713000  |
| C | -0.911474000 | -3.874594000 | 2.353929000  | H | -5.845895000 | -0.234328000 | 4.769129000  |
| C | -1.998431000 | -3.410946000 | -2.692288000 | H | -5.711021000 | -0.222854000 | 2.976610000  |
| C | -1.856197000 | -3.783452000 | -4.964175000 | H | -2.445795000 | -3.716367000 | 5.450196000  |
| C | -3.132054000 | -3.344496000 | -4.692435000 | H | -3.996723000 | -1.521739000 | 6.156738000  |
| C | -4.436676000 | -2.748210000 | -2.555409000 | H | -3.277644000 | 4.075345000  | 1.708514000  |
| C | -4.502468000 | -1.277409000 | -2.239586000 | H | -2.868209000 | 4.942795000  | 3.215159000  |
| C | -4.601718000 | -0.152404000 | -3.089096000 | H | -2.448870000 | -5.125506000 | 3.183345000  |
| C | -4.628223000 | 0.970188000  | -2.231664000 | H | -2.907706000 | -4.278722000 | 1.680345000  |
| C | -4.707365000 | 2.442930000  | -2.539364000 | H | -1.410460000 | -4.098015000 | -5.899797000 |
| C | -2.336456000 | 3.305635000  | -2.684274000 | H | -3.982360000 | -3.206502000 | -5.348917000 |
| C | -2.207761000 | 3.636161000  | -4.962788000 | H | -5.294612000 | -3.059371000 | -3.168914000 |

|                         |              |              |              |    |              |              |              |
|-------------------------|--------------|--------------|--------------|----|--------------|--------------|--------------|
| H                       | -4.448373000 | -3.322540000 | -1.617737000 | Au | 0.690309000  | 3.513909000  | 0.871336000  |
| H                       | -4.667969000 | -0.152945000 | -4.171352000 | Au | 2.598311000  | -3.154235000 | 0.818195000  |
| H                       | -4.761173000 | 3.009934000  | -1.598698000 | Au | -3.816890000 | -2.386819000 | -0.857831000 |
| H                       | -5.594437000 | 2.677006000  | -3.145471000 | Au | -4.730409000 | 0.713122000  | -0.862651000 |
| H                       | -1.779831000 | 3.959770000  | -5.903598000 | Au | -2.570798000 | 3.023500000  | 0.804704000  |
| H                       | -4.290482000 | 2.912768000  | -5.340971000 | Au | -0.729482000 | -3.435231000 | 0.764262000  |
| H                       | -0.106799000 | 4.502276000  | 4.163366000  | N  | 4.146413000  | -2.226841000 | -3.302926000 |
| H                       | 0.255729000  | -4.507460000 | 4.162326000  | N  | 4.900093000  | -0.207962000 | -3.701852000 |
| H                       | 0.165975000  | -4.902790000 | -2.525767000 | N  | 4.200130000  | 2.157764000  | -3.664165000 |
| H                       | 0.157838000  | -5.354267000 | -4.256912000 | N  | 2.539179000  | 3.518978000  | -3.219157000 |
| H                       | -0.243423000 | 4.893454000  | -2.534542000 | N  | 1.691884000  | -3.269812000 | -1.069110000 |
| H                       | -0.281815000 | 5.338479000  | -4.266900000 | N  | -0.214861000 | 3.487442000  | -1.022742000 |
| H                       | 4.021282000  | -2.774656000 | -5.498562000 | N  | 0.164940000  | 3.835856000  | 3.849500000  |
| C                       | -0.286085000 | 0.001731000  | 0.816635000  | N  | 2.297406000  | 3.433823000  | 3.508632000  |
| C                       | 1.073623000  | 0.030761000  | 1.365441000  | N  | 4.256876000  | 1.535467000  | 1.215841000  |
| C                       | 1.137078000  | 0.017241000  | 2.916393000  | N  | 4.684579000  | 0.200126000  | 1.201087000  |
| C                       | -1.379813000 | -0.003416000 | 0.258966000  | N  | 3.976828000  | -2.407843000 | 3.470308000  |
| H                       | 2.187092000  | 0.064809000  | 3.240606000  | N  | 2.127071000  | -3.542980000 | 3.789205000  |
| H                       | 0.685296000  | -0.905211000 | 3.315228000  | N  | -2.368113000 | -3.409055000 | -3.378276000 |
| H                       | 0.598996000  | 0.883859000  | 3.333382000  | N  | -3.991306000 | -2.022503000 | -3.871528000 |
| H                       | -2.276500000 | 0.004738000  | -0.311816000 | N  | -4.697568000 | 0.332467000  | -3.878459000 |
| H                       | 1.568425000  | 0.938559000  | 0.983536000  | N  | -3.989936000 | 2.343074000  | -3.377262000 |
| H                       | 1.626039000  | -0.835008000 | 0.965361000  | N  | 0.302683000  | -3.452293000 | -1.085432000 |
| C                       | 0.255382000  | -0.037807000 | -2.447705000 | N  | -1.600299000 | 3.282980000  | -1.049550000 |
| C                       | -1.115296000 | -0.003950000 | -2.979471000 | N  | -2.328917000 | 3.431818000  | 3.792177000  |
| C                       | -1.181697000 | -0.036866000 | -4.532869000 | N  | -4.151101000 | 2.289143000  | 3.356946000  |
| C                       | 1.372673000  | -0.062065000 | -1.938027000 | N  | -4.723046000 | -0.237086000 | 1.011800000  |
| H                       | -2.231954000 | -0.015133000 | -4.865380000 | N  | -4.316880000 | -1.573027000 | 1.011731000  |
| H                       | -0.708438000 | -0.952591000 | -4.921538000 | N  | -2.493051000 | -3.520863000 | 3.318317000  |
| H                       | -0.657009000 | 0.831749000  | -4.962363000 | N  | -0.372833000 | -3.923627000 | 3.737240000  |
| H                       | 2.291914000  | -0.114476000 | -1.401705000 | C  | 4.615435000  | -1.098224000 | -2.666452000 |
| H                       | -1.615729000 | 0.899670000  | -2.599278000 | C  | 4.160671000  | -2.067976000 | -4.701702000 |
| H                       | -1.672522000 | -0.856236000 | -2.560975000 | C  | 4.636351000  | -0.801938000 | -4.955241000 |
| <u>2(2-butynyl)@PPX</u> |              |              |              | C  | 5.329914000  | 1.201761000  | -3.535854000 |
| Au                      | 4.746999000  | -0.682301000 | -0.707226000 | C  | 3.513123000  | 2.757540000  | -2.608425000 |
| Au                      | 3.823994000  | 2.384968000  | -0.658302000 | C  | 2.618912000  | 3.419676000  | -4.621437000 |



|   |              |              |              |   |              |              |              |
|---|--------------|--------------|--------------|---|--------------|--------------|--------------|
| C | 3.661253000  | 2.566955000  | -4.902923000 | C | -1.053333000 | -3.957270000 | 4.974404000  |
| C | 3.665967000  | -3.451501000 | -2.595077000 | C | -2.379099000 | -3.700680000 | 4.710163000  |
| C | 2.173078000  | -3.478275000 | -2.338235000 | C | 1.091167000  | -3.821086000 | -3.185948000 |
| C | 1.593810000  | 4.412989000  | -2.485808000 | C | -0.947327000 | 3.931391000  | -3.125815000 |
| C | 0.186975000  | 3.890125000  | -2.277100000 | C | -1.202170000 | 4.381697000  | 3.635627000  |
| C | 1.106779000  | 3.611825000  | 2.838724000  | C | 0.998578000  | -4.474622000 | 3.558196000  |
| C | 0.784104000  | 3.781746000  | 5.117716000  | H | 3.877015000  | -2.860802000 | -5.382556000 |
| C | 2.119369000  | 3.525839000  | 4.901722000  | H | 4.840508000  | -0.305656000 | -5.895744000 |
| C | 3.625562000  | 3.314537000  | 2.831954000  | H | 6.063213000  | 1.432420000  | -4.320095000 |
| C | 4.037535000  | 1.898727000  | 2.519847000  | H | 5.784957000  | 1.321926000  | -2.546914000 |
| C | 4.326627000  | 0.800913000  | 3.363156000  | H | 1.973506000  | 3.980865000  | -5.285400000 |
| C | 4.719525000  | -0.247551000 | 2.499388000  | H | 4.076976000  | 2.261128000  | -5.854882000 |
| C | 5.096324000  | -1.677705000 | 2.801061000  | H | 4.204675000  | -3.499989000 | -1.637881000 |
| C | 2.972260000  | -3.055612000 | 2.789288000  | H | 3.959769000  | -4.317270000 | -3.206189000 |
| C | 2.625470000  | -3.201486000 | 5.065195000  | H | 1.548115000  | 5.358633000  | -3.046597000 |
| C | 3.782693000  | -2.482655000 | 4.862161000  | H | 2.051217000  | 4.615360000  | -1.507202000 |
| C | -3.388980000 | -2.684438000 | -2.801111000 | H | 0.250134000  | 3.967214000  | 6.041562000  |
| C | -2.332964000 | -3.224135000 | -4.772509000 | H | 4.362034000  | 3.798358000  | 3.490939000  |
| C | -3.352952000 | -2.354820000 | -5.084808000 | H | 3.567632000  | 3.888687000  | 1.896014000  |
| C | -5.134620000 | -1.079929000 | -3.781966000 | H | 4.283417000  | 0.775299000  | 4.446613000  |
| C | -4.502100000 | 1.199812000  | -2.803011000 | H | 5.327206000  | -2.204483000 | 1.863995000  |
| C | -3.887034000 | 2.214374000  | -4.774405000 | H | 5.970679000  | -1.734293000 | 3.465699000  |
| C | -4.333748000 | 0.952270000  | -5.092212000 | H | 2.154745000  | -3.519778000 | 5.987069000  |
| C | -1.461529000 | -4.325526000 | -2.628135000 | H | 4.484962000  | -2.065286000 | 5.573306000  |
| C | -0.063325000 | -3.808787000 | -2.364607000 | H | -1.634136000 | -3.745736000 | -5.414149000 |
| C | -3.535935000 | 3.540378000  | -2.611260000 | H | -3.693924000 | -1.994299000 | -6.047038000 |
| C | -2.049607000 | 3.551194000  | -2.319976000 | H | -5.817023000 | -1.288317000 | -4.616919000 |
| C | -3.097053000 | 2.925371000  | 2.739969000  | H | -5.650154000 | -1.233830000 | -2.827882000 |
| C | -2.915922000 | 3.104582000  | 5.033966000  | H | -3.554433000 | 3.023609000  | -5.412301000 |
| C | -4.055263000 | 2.382281000  | 4.758470000  | H | -4.462783000 | 0.478109000  | -6.057009000 |
| C | -5.255103000 | 1.587069000  | 2.627397000  | H | -1.953821000 | -4.543777000 | -1.670275000 |
| C | -4.901074000 | 0.154428000  | 2.314683000  | H | -1.399471000 | -5.260632000 | -3.204946000 |
| C | -4.626618000 | -0.940518000 | 3.168826000  | H | -3.812826000 | 4.429822000  | -3.195704000 |
| C | -4.240963000 | -1.998416000 | 2.313309000  | H | -4.098161000 | 3.552611000  | -1.666727000 |
| C | -3.804349000 | -3.410765000 | 2.598742000  | H | -2.513355000 | 3.437215000  | 5.982809000  |
| C | -1.267698000 | -3.638636000 | 2.695975000  | H | -4.806756000 | 1.974738000  | 5.423516000  |

|                                        |              |              |              |    |              |              |              |
|----------------------------------------|--------------|--------------|--------------|----|--------------|--------------|--------------|
| H                                      | -6.154250000 | 1.654565000  | 3.256579000  | Au | -4.463536000 | 0.045947000  | -0.948795000 |
| H                                      | -5.433512000 | 2.136579000  | 1.691887000  | Au | -3.073554000 | -2.754730000 | 0.757651000  |
| H                                      | -4.694262000 | -0.961352000 | 4.251154000  | Au | 0.007362000  | 3.722048000  | 0.876951000  |
| H                                      | -3.697414000 | -3.956315000 | 1.650200000  | Au | 4.547152000  | -0.040625000 | -0.787313000 |
| H                                      | -4.546201000 | -3.934692000 | 3.219286000  | Au | 3.062514000  | -2.831280000 | -0.800504000 |
| H                                      | -0.563274000 | -4.200400000 | 5.909171000  | Au | -0.054563000 | -3.811877000 | 0.803780000  |
| H                                      | -3.234792000 | -3.674588000 | 5.373650000  | Au | 3.050110000  | 2.725321000  | 0.912784000  |
| H                                      | 1.146129000  | -4.103142000 | -4.232692000 | N  | -1.588041000 | 4.000038000  | -3.332057000 |
| H                                      | -0.976584000 | 4.251947000  | -4.162521000 | N  | -3.287346000 | 2.733216000  | -3.885739000 |
| H                                      | -1.246258000 | 4.801471000  | 2.625331000  | N  | -4.356966000 | 0.492078000  | -3.954753000 |
| H                                      | -1.345752000 | 5.186067000  | 4.370419000  | N  | -4.227946000 | -1.645131000 | -3.495673000 |
| H                                      | 1.078653000  | -4.858371000 | 2.536125000  | N  | 0.947774000  | 3.594664000  | -1.000720000 |
| H                                      | 1.104053000  | -5.306049000 | 4.269056000  | N  | -2.242182000 | -3.171411000 | -1.122841000 |
| H                                      | 2.941244000  | 3.446011000  | 5.602583000  | N  | -2.944663000 | -3.229860000 | 3.760352000  |
| C                                      | -1.508677000 | -0.072957000 | -0.454204000 | N  | -4.454054000 | -1.713441000 | 3.294107000  |
| C                                      | -1.536789000 | -0.053727000 | 0.774770000  | N  | -4.250570000 | 0.878065000  | 0.966442000  |
| C                                      | -1.432720000 | 0.031844000  | 2.240484000  | N  | -3.621557000 | 2.127555000  | 1.002958000  |
| C                                      | -1.456548000 | -0.091299000 | -1.922085000 | N  | -1.736582000 | 3.848146000  | 3.411290000  |
| H                                      | -0.766540000 | 0.865847000  | 2.519985000  | N  | 0.402708000  | 3.948460000  | 3.883855000  |
| H                                      | -1.022436000 | -0.900672000 | 2.663315000  | N  | 4.397797000  | 1.705708000  | -3.307289000 |
| H                                      | -0.842695000 | -0.937437000 | -2.263903000 | N  | 4.588696000  | -0.420228000 | -3.798957000 |
| H                                      | -1.009359000 | 0.841147000  | -2.295493000 | N  | 3.478240000  | -2.646603000 | -3.809811000 |
| H                                      | -2.408726000 | 0.219940000  | 2.701540000  | N  | 1.732168000  | -3.892253000 | -3.361625000 |
| H                                      | -2.456188000 | -0.199442000 | -2.360071000 | N  | 2.264754000  | 3.114666000  | -0.995231000 |
| C                                      | 1.566559000  | 0.104986000  | -1.769499000 | N  | -0.919858000 | -3.631688000 | -1.098889000 |
| C                                      | 1.522847000  | 0.042447000  | -0.542508000 | N  | -0.557112000 | -4.007530000 | 3.795479000  |
| C                                      | 1.482250000  | -0.069508000 | 0.918418000  | N  | 1.596063000  | -3.874813000 | 3.396344000  |
| C                                      | 1.494875000  | 0.168875000  | -3.237525000 | N  | 3.653757000  | -2.154993000 | 1.090501000  |
| H                                      | 2.471715000  | -0.289964000 | 1.326680000  | N  | 4.313089000  | -0.921372000 | 1.102326000  |
| H                                      | 0.808196000  | -0.888685000 | 1.207906000  | N  | 4.326076000  | 1.642325000  | 3.486108000  |
| H                                      | 1.012581000  | -0.735887000 | -3.645198000 | N  | 2.777053000  | 3.130964000  | 3.913626000  |
| H                                      | 2.487761000  | 0.248095000  | -3.695993000 | C  | -2.625555000 | 3.277518000  | -2.786963000 |
| H                                      | 1.115599000  | 0.853701000  | 1.386008000  | C  | -1.589296000 | 3.916709000  | -4.736577000 |
| H                                      | 0.909485000  | 1.044724000  | -3.565386000 | C  | -2.658437000 | 3.123578000  | -5.086748000 |
| <u>2C<sub>4</sub>H<sub>8</sub>@PPX</u> |              |              |              | C  | -4.546147000 | 1.953949000  | -3.827410000 |
| Au                                     | -3.042555000 | 2.904249000  | -0.858565000 | C  | -4.395432000 | -0.415756000 | -2.899703000 |

|   |              |              |              |   |              |              |              |
|---|--------------|--------------|--------------|---|--------------|--------------|--------------|
| C | -4.089835000 | -1.522567000 | -4.890946000 | C | 3.444012000  | 2.495069000  | 2.867075000  |
| C | -4.174906000 | -0.179609000 | -5.182027000 | C | 3.253191000  | 2.665939000  | 5.158032000  |
| C | -0.623389000 | 4.804316000  | -2.526199000 | C | 4.223123000  | 1.726312000  | 4.886482000  |
| C | 0.685160000  | 4.106167000  | -2.249463000 | C | 1.829564000  | 3.942411000  | -3.063684000 |
| C | -4.140286000 | -2.927760000 | -2.738427000 | C | -1.697855000 | -3.849159000 | -3.219188000 |
| C | -2.716987000 | -3.302610000 | -2.404993000 | C | -1.990305000 | -4.350981000 | 3.618662000  |
| C | -3.536308000 | -2.546172000 | 2.700052000  | C | 1.846030000  | 4.269032000  | 3.752431000  |
| C | -3.506705000 | -2.820169000 | 4.987655000  | H | -0.875468000 | 4.445473000  | -5.355500000 |
| C | -4.452235000 | -1.863015000 | 4.692796000  | H | -3.036457000 | 2.851507000  | -6.064440000 |
| C | -5.311012000 | -0.759348000 | 2.528509000  | H | -5.187634000 | 2.287593000  | -4.654494000 |
| C | -4.596307000 | 0.537615000  | 2.250040000  | H | -5.037604000 | 2.158607000  | -2.870000000 |
| C | -4.193365000 | 1.569408000  | 3.127781000  | H | -3.989617000 | -2.378211000 | -5.546912000 |
| C | -3.584373000 | 2.547131000  | 2.309746000  | H | -4.167253000 | 0.330376000  | -6.137301000 |
| C | -3.019255000 | 3.900188000  | 2.645434000  | H | -1.119187000 | 5.043188000  | -1.574683000 |
| C | -0.495711000 | 3.863776000  | 2.817728000  | H | -0.441881000 | 5.741379000  | -3.072480000 |
| C | -0.291864000 | 3.966828000  | 5.112803000  | H | -4.612803000 | -3.709132000 | -3.350581000 |
| C | -1.634164000 | 3.899708000  | 4.813671000  | H | -4.717902000 | -2.804256000 | -1.811585000 |
| C | 4.536940000  | 0.466370000  | -2.727723000 | H | -3.223268000 | -3.253321000 | 5.938955000  |
| C | 4.371963000  | 1.610958000  | -4.710731000 | H | -6.225079000 | -0.591841000 | 3.115967000  |
| C | 4.495920000  | 0.274846000  | -5.021867000 | H | -5.582570000 | -1.242715000 | 1.579017000  |
| C | 4.744885000  | -1.886531000 | -3.679998000 | H | -4.346665000 | 1.614113000  | 4.200570000  |
| C | 2.736528000  | -3.173345000 | -2.753153000 | H | -2.818920000 | 4.451921000  | 1.715880000  |
| C | 1.825343000  | -3.815382000 | -4.763285000 | H | -3.731324000 | 4.479964000  | 3.250736000  |
| C | 2.923192000  | -3.034271000 | -5.046300000 | H | 0.206573000  | 4.066165000  | 6.069266000  |
| C | 4.241941000  | 2.970591000  | -2.528450000 | H | -2.500253000 | 3.924435000  | 5.463354000  |
| C | 2.799843000  | 3.319816000  | -2.244712000 | H | 4.307468000  | 2.478801000  | -5.355117000 |
| C | 0.737731000  | -4.720879000 | -2.617921000 | H | 4.561244000  | -0.215433000 | -5.985267000 |
| C | -0.587145000 | -4.045327000 | -2.365811000 | H | 5.421005000  | -2.222907000 | -4.477549000 |
| C | 0.377436000  | -3.931015000 | 2.761353000  | H | 5.183647000  | -2.111909000 | -2.702361000 |
| C | 0.092850000  | -3.981395000 | 5.047817000  | H | 1.149643000  | -4.342177000 | -5.425322000 |
| C | 1.443691000  | -3.894875000 | 4.795117000  | H | 3.364457000  | -2.767770000 | -5.998747000 |
| C | 2.905597000  | -3.922212000 | 2.678175000  | H | 4.783571000  | 2.838958000  | -1.581067000 |
| C | 3.505539000  | -2.572071000 | 2.388626000  | H | 4.724665000  | 3.774122000  | -3.102683000 |
| C | 4.066174000  | -1.604185000 | 3.251542000  | H | 0.585392000  | -5.641874000 | -3.199795000 |
| C | 4.554547000  | -0.580595000 | 2.408464000  | H | 1.198904000  | -4.989010000 | -1.657077000 |
| C | 5.237596000  | 0.719932000  | 2.744404000  | H | -0.437800000 | -4.064250000 | 5.988252000  |

|   |              |              |              |                                        |              |              |              |
|---|--------------|--------------|--------------|----------------------------------------|--------------|--------------|--------------|
| H | 2.285746000  | -3.887351000 | 5.475984000  | H                                      | -1.394604000 | -1.080991000 | -2.515304000 |
| H | 3.587897000  | -4.522073000 | 3.298752000  | H                                      | -0.662534000 | 1.148126000  | -0.492533000 |
| H | 2.736604000  | -4.455046000 | 1.731660000  | H                                      | -1.677985000 | -0.367155000 | -0.152210000 |
| H | 4.135422000  | -1.651230000 | 4.332946000  | <u>2(E)-C<sub>4</sub>H<sub>8</sub></u> |              |              |              |
| H | 5.545019000  | 1.227275000  | 1.818628000  | Au                                     | -0.905628000 | 3.612464000  | 0.761845000  |
| H | 6.125170000  | 0.557717000  | 3.372889000  | Au                                     | 2.429546000  | 3.310596000  | 0.828949000  |
| H | 2.905017000  | 3.057478000  | 6.105877000  | Au                                     | 4.745370000  | 0.904793000  | -0.715869000 |
| H | 4.856350000  | 1.156551000  | 5.555248000  | Au                                     | -4.012057000 | 2.402855000  | -0.856200000 |
| H | 1.951737000  | 4.265647000  | -4.092286000 | Au                                     | -2.448984000 | -3.293102000 | 0.808929000  |
| H | -1.769990000 | -4.107742000 | -4.270455000 | Au                                     | 0.858044000  | -3.658197000 | 0.900602000  |
| H | -2.115264000 | -4.785829000 | 2.621198000  | Au                                     | 3.913193000  | -2.278367000 | -0.642641000 |
| H | -2.244756000 | -5.102205000 | 4.378714000  | Au                                     | -4.651802000 | -0.912705000 | -0.853844000 |
| H | 2.008328000  | 4.706776000  | 2.761790000  | N                                      | -2.653654000 | 3.459237000  | 3.323432000  |
| H | 2.088337000  | 5.011701000  | 4.524862000  | N                                      | -0.547201000 | 3.916158000  | 3.755247000  |
| H | -5.127231000 | -1.318220000 | 5.341183000  | N                                      | 1.966463000  | 3.615208000  | 3.808827000  |
| H | -1.984302000 | -0.508296000 | 4.359283000  | N                                      | 3.856818000  | 2.557309000  | 3.459699000  |
| C | -0.977609000 | -0.199764000 | 4.035255000  | N                                      | -4.497054000 | 1.494232000  | 0.988900000  |
| C | -0.881091000 | -0.139683000 | 2.487630000  | N                                      | 4.726999000  | -0.017614000 | 1.184167000  |
| C | 0.478655000  | 0.333010000  | 2.011938000  | N                                      | 4.670090000  | 0.373381000  | -3.697572000 |
| C | 1.182733000  | -0.266397000 | 1.027166000  | N                                      | 3.912282000  | 2.394660000  | -3.294005000 |
| H | -0.768588000 | 0.791135000  | 4.476716000  | N                                      | 1.522798000  | 3.551193000  | -1.052521000 |
| H | -0.243378000 | -0.915174000 | 4.444151000  | N                                      | 0.130556000  | 3.707247000  | -1.071008000 |
| H | -1.660502000 | 0.543083000  | 2.104060000  | N                                      | -2.503955000 | 3.451424000  | -3.356777000 |
| H | -1.085121000 | -1.134646000 | 2.057579000  | N                                      | -3.982704000 | 1.909893000  | -3.847894000 |
| H | 0.880423000  | 1.237845000  | 2.485650000  | N                                      | -3.985499000 | -2.421287000 | 3.343629000  |
| H | 0.811046000  | -1.149641000 | 0.506135000  | N                                      | -2.149608000 | -3.523951000 | 3.813267000  |
| H | 2.134518000  | 0.123807000  | 0.683848000  | N                                      | 0.349617000  | -3.841200000 | 3.886300000  |
| H | 1.939046000  | 0.442658000  | -3.990524000 | N                                      | 2.454806000  | -3.329537000 | 3.524068000  |
| C | 1.297223000  | -0.094349000 | -3.273755000 | N                                      | -4.780206000 | 0.118181000  | 0.983239000  |
| C | -0.080806000 | 0.616792000  | -3.132262000 | N                                      | 4.353591000  | -1.372165000 | 1.204246000  |
| C | -0.958122000 | -0.144001000 | -2.158208000 | N                                      | 4.231998000  | -2.072680000 | -3.651948000 |
| C | -1.118956000 | 0.231196000  | -0.869747000 | N                                      | 2.712733000  | -3.584918000 | -3.183281000 |
| H | 1.160166000  | -1.125970000 | -3.637379000 | N                                      | -0.054193000 | -3.779770000 | -0.981306000 |
| H | 1.805619000  | -0.138649000 | -2.296088000 | N                                      | -1.441118000 | -3.596681000 | -1.025765000 |
| H | -0.558722000 | 0.681752000  | -4.127339000 | N                                      | -3.754841000 | -2.505591000 | -3.367883000 |
| H | 0.077416000  | 1.641231000  | -2.764531000 | N                                      | -4.499778000 | -0.503186000 | -3.852733000 |

|   |              |              |              |   |              |              |              |
|---|--------------|--------------|--------------|---|--------------|--------------|--------------|
| C | -1.439990000 | 3.667336000  | 2.704038000  | C | 1.827995000  | -4.533178000 | -2.440144000 |
| C | -2.535229000 | 3.552143000  | 4.723353000  | C | 0.384574000  | -4.101204000 | -2.247872000 |
| C | -1.218001000 | 3.842112000  | 4.995713000  | C | -0.730930000 | -4.111649000 | -3.121493000 |
| C | 0.806968000  | 4.516241000  | 3.604393000  | C | -1.856865000 | -3.788906000 | -2.318815000 |
| C | 2.815036000  | 3.160795000  | 2.794853000  | C | -3.338355000 | -3.735714000 | -2.632470000 |
| C | 3.681429000  | 2.623418000  | 4.854339000  | C | -4.320560000 | -1.389765000 | -2.787165000 |
| C | 2.498939000  | 3.293279000  | 5.076238000  | C | -4.071610000 | -1.086194000 | -5.063947000 |
| C | -3.959805000 | 3.313648000  | 2.605469000  | C | -3.600612000 | -2.340898000 | -4.756718000 |
| C | -4.322463000 | 1.883618000  | 2.295311000  | C | -4.528807000 | 0.774954000  | 3.144724000  |
| C | 5.007697000  | 1.891026000  | 2.777963000  | C | 4.339731000  | -0.610911000 | 3.344421000  |
| C | 4.705982000  | 0.443318000  | 2.477411000  | C | 5.242299000  | -0.991043000 | -3.545764000 |
| C | 4.462725000  | 1.293668000  | -2.668593000 | C | -5.044544000 | 0.874014000  | -3.768873000 |
| C | 4.283498000  | 0.922932000  | -4.937228000 | H | -3.383783000 | 3.450061000  | 5.388578000  |
| C | 3.805354000  | 2.187142000  | -4.683110000 | H | -0.729124000 | 4.040301000  | 5.941561000  |
| C | 3.487453000  | 3.651109000  | -2.598689000 | H | 0.883839000  | 5.322906000  | 4.346722000  |
| C | 1.996545000  | 3.737549000  | -2.330778000 | H | 0.879717000  | 4.942975000  | 2.599030000  |
| C | 0.905585000  | 4.050811000  | -3.179068000 | H | 4.411364000  | 2.234881000  | 5.553773000  |
| C | -0.247062000 | 4.030360000  | -2.353584000 | H | 2.030609000  | 3.592253000  | 6.005822000  |
| C | -1.677190000 | 4.452850000  | -2.623234000 | H | -3.882798000 | 3.887413000  | 1.670860000  |
| C | -3.494502000 | 2.678313000  | -2.788380000 | H | -4.722920000 | 3.787680000  | 3.240770000  |
| C | -3.311979000 | 2.232610000  | -5.045616000 | H | 5.882843000  | 1.993921000  | 3.436311000  |
| C | -2.382644000 | 3.197223000  | -4.734882000 | H | 5.204311000  | 2.433867000  | 1.842254000  |
| C | -2.943499000 | -3.093848000 | 2.746890000  | H | 4.403479000  | 0.398148000  | -5.876491000 |
| C | -3.859812000 | -2.420437000 | 4.745416000  | H | 3.811501000  | 4.494866000  | -3.225236000 |
| C | -2.710696000 | -3.117407000 | 5.042806000  | H | 4.035338000  | 3.690265000  | -1.646288000 |
| C | -0.996379000 | -4.446116000 | 3.699055000  | H | 0.951353000  | 4.307044000  | -4.232746000 |
| C | 1.278909000  | -3.613040000 | 2.866835000  | H | -2.187100000 | 4.650634000  | -1.670005000 |
| C | 2.279391000  | -3.362237000 | 4.920027000  | H | -1.682574000 | 5.379150000  | -3.217356000 |
| C | 0.961080000  | -3.686573000 | 5.149496000  | H | -3.571277000 | 1.796079000  | -6.001430000 |
| C | -5.096685000 | -1.762643000 | 2.596127000  | H | -1.692762000 | 3.738245000  | -5.369803000 |
| C | -4.802594000 | -0.313635000 | 2.285187000  | H | -4.601323000 | -1.975791000 | 5.397565000  |
| C | 3.772405000  | -3.159179000 | 2.838614000  | H | -2.285919000 | -3.385712000 | 6.002136000  |
| C | 4.120981000  | -1.729245000 | 2.508778000  | H | -1.112549000 | -5.219595000 | 4.470926000  |
| C | 3.597093000  | -2.710074000 | -2.584764000 | H | -1.028085000 | -4.913366000 | 2.709575000  |
| C | 3.765681000  | -2.582438000 | -4.883430000 | H | 3.093413000  | -3.199851000 | 5.615617000  |
| C | 2.810772000  | -3.527301000 | -4.587390000 | H | 0.436910000  | -3.857410000 | 6.081704000  |

|   |              |              |              |                                        |              |              |              |
|---|--------------|--------------|--------------|----------------------------------------|--------------|--------------|--------------|
| H | -5.244575000 | -2.322885000 | 1.662186000  | C                                      | 1.562524000  | 0.116922000  | 0.515939000  |
| H | -6.005098000 | -1.859218000 | 3.209266000  | H                                      | 1.576748000  | 0.803456000  | -3.570695000 |
| H | 4.533545000  | -3.600685000 | 3.499617000  | H                                      | 0.359548000  | -0.472360000 | -3.838780000 |
| H | 3.736307000  | -3.749493000 | 1.911923000  | H                                      | 1.150643000  | -1.632762000 | -1.655470000 |
| H | 4.165232000  | -2.266700000 | -5.839165000 | H                                      | 1.849946000  | 1.323612000  | -1.304103000 |
| H | 2.236528000  | -4.172658000 | -5.240204000 | H                                      | 1.306617000  | -0.912740000 | 0.791664000  |
| H | 1.855025000  | -5.488817000 | -2.985201000 | H                                      | 0.797134000  | 0.794586000  | 0.923577000  |
| H | 2.290771000  | -4.685829000 | -1.454630000 | H                                      | 2.504721000  | 0.380341000  | 1.003561000  |
| H | -0.733089000 | -4.364985000 | -4.176896000 | <u>2(Z)-C<sub>4</sub>H<sub>8</sub></u> |              |              |              |
| H | -3.915695000 | -3.763450000 | -1.697357000 | Au                                     | 0.737082000  | -4.043458000 | -0.733611000 |
| H | -3.629764000 | -4.599260000 | -3.248255000 | Au                                     | 3.350197000  | -2.301253000 | -0.689235000 |
| H | -4.180412000 | -0.597040000 | -6.023453000 | Au                                     | 4.160529000  | 0.752822000  | 0.941221000  |
| H | -3.221716000 | -3.126133000 | -5.398650000 | Au                                     | -2.405962000 | -3.407486000 | 0.804699000  |
| H | -4.499788000 | 0.764903000  | 4.228715000  | Au                                     | -3.497101000 | 2.422393000  | -0.859040000 |
| H | 4.271534000  | -0.575108000 | 4.426248000  | Au                                     | -0.706829000 | 3.982301000  | -0.838176000 |
| H | 5.734416000  | -1.060340000 | -2.569826000 | Au                                     | 2.400971000  | 3.406077000  | 0.866821000  |
| H | 5.979035000  | -1.140071000 | -4.346858000 | Au                                     | -4.064360000 | -0.698585000 | 0.774707000  |
| H | -5.590913000 | 0.990245000  | -2.826983000 | N                                      | -0.786041000 | -4.346688000 | -3.374691000 |
| H | -5.727107000 | 1.021938000  | -4.616971000 | N                                      | 1.380556000  | -4.261737000 | -3.700335000 |
| H | 3.441807000  | 2.949240000  | -5.360752000 | N                                      | 3.518023000  | -2.978183000 | -3.649233000 |
| H | -1.342900000 | -0.708980000 | -2.488866000 | N                                      | 4.518375000  | -1.070484000 | -3.244482000 |
| C | -1.520022000 | 0.091317000  | -1.755749000 | N                                      | -2.855176000 | -2.665542000 | -1.110667000 |
| C | -1.259872000 | -0.422909000 | -0.352567000 | N                                      | 3.777498000  | 1.509447000  | -0.976350000 |
| C | -1.633722000 | 0.151001000  | 0.812992000  | N                                      | 4.166880000  | 1.268810000  | 3.942677000  |
| C | -1.207592000 | -0.333644000 | 2.184549000  | N                                      | 4.311496000  | -0.877112000 | 3.534533000  |
| H | -0.848380000 | 0.930466000  | -1.994825000 | N                                      | 2.607300000  | -2.822878000 | 1.204469000  |
| H | -2.543736000 | 0.444010000  | -1.890256000 | N                                      | 1.436868000  | -3.588909000 | 1.184280000  |
| H | -0.620281000 | -1.300926000 | -0.292923000 | N                                      | -1.109285000 | -4.339179000 | 3.423615000  |
| H | -2.232375000 | 1.055293000  | 0.797616000  | N                                      | -3.002929000 | -3.302940000 | 3.790162000  |
| H | -0.605231000 | -1.253088000 | 2.109196000  | N                                      | -4.371549000 | 1.004636000  | -3.433119000 |
| H | -2.082448000 | -0.531571000 | 2.822752000  | N                                      | -3.289535000 | 2.859108000  | -3.861908000 |
| H | -0.599901000 | 0.439432000  | 2.692861000  | N                                      | -1.151480000 | 4.134905000  | -3.844112000 |
| H | 2.074427000  | -0.852416000 | -4.005912000 | N                                      | 0.988041000  | 4.273793000  | -3.388606000 |
| C | 1.358024000  | -0.264996000 | -3.415156000 | N                                      | -3.630708000 | -1.498806000 | -1.113656000 |
| C | 1.394555000  | -0.608249000 | -1.940692000 | N                                      | 3.006807000  | 2.676621000  | -1.008581000 |
| C | 1.634711000  | 0.309676000  | -0.976798000 | N                                      | 2.817190000  | 3.351116000  | 3.883794000  |

|   |              |              |              |   |              |              |              |
|---|--------------|--------------|--------------|---|--------------|--------------|--------------|
| N | 0.937020000  | 4.359479000  | 3.393391000  | C | 2.269727000  | 4.419607000  | -2.633976000 |
| N | -1.565048000 | 3.638385000  | 1.043881000  | C | 2.950504000  | 3.114414000  | -2.309618000 |
| N | -2.764358000 | 2.917259000  | 1.037607000  | C | 2.030644000  | 3.763134000  | 2.809292000  |
| N | -4.482443000 | 0.940111000  | 3.342617000  | C | 2.207430000  | 3.697693000  | 5.107672000  |
| N | -4.340632000 | -1.205339000 | 3.760372000  | C | 1.023552000  | 4.328713000  | 4.796836000  |
| C | 0.410021000  | -4.271835000 | -2.700332000 | C | -0.172950000 | 4.985222000  | 2.618807000  |
| C | -0.584246000 | -4.374424000 | -4.766203000 | C | -1.323374000 | 4.053451000  | 2.330748000  |
| C | 0.776517000  | -4.323421000 | -4.973345000 | C | -2.361222000 | 3.583769000  | 3.168403000  |
| C | 2.844768000  | -4.285815000 | -3.469048000 | C | -3.246285000 | 2.876536000  | 2.321924000  |
| C | 3.848824000  | -2.097450000 | -2.621213000 | C | -4.581109000 | 2.236030000  | 2.607429000  |
| C | 4.605006000  | -1.286710000 | -4.632396000 | C | -4.343855000 | -0.278278000 | 2.719354000  |
| C | 3.976740000  | -2.485228000 | -4.889042000 | C | -4.474021000 | -0.553967000 | 5.004994000  |
| C | -2.112375000 | -4.451974000 | -2.693382000 | C | -4.560402000 | 0.794686000  | 4.740379000  |
| C | -2.783130000 | -3.132356000 | -2.401629000 | C | -3.518247000 | -2.267674000 | -3.244669000 |
| C | 5.130352000  | 0.078990000  | -2.510198000 | C | 3.689374000  | 2.227836000  | -3.126388000 |
| C | 4.190790000  | 1.231952000  | -2.256547000 | C | 4.160927000  | 2.738516000  | 3.773173000  |
| C | 4.259105000  | 0.344464000  | 2.904442000  | C | -4.329400000 | -2.676870000 | 3.590944000  |
| C | 4.169272000  | 0.614406000  | 5.192260000  | H | -1.398091000 | -4.464060000 | -5.474868000 |
| C | 4.256584000  | -0.735399000 | 4.932793000  | H | 1.344937000  | -4.366148000 | -5.894073000 |
| C | 4.415850000  | -2.175194000 | 2.806231000  | H | 3.289015000  | -4.993083000 | -4.182274000 |
| C | 3.082450000  | -2.806476000 | 2.493481000  | H | 3.024472000  | -4.627016000 | -2.443942000 |
| C | 2.207706000  | -3.553960000 | 3.316198000  | H | 5.125697000  | -0.610709000 | -5.299330000 |
| C | 1.190276000  | -4.032988000 | 2.459031000  | H | 3.862194000  | -3.029651000 | -5.818271000 |
| C | 0.043524000  | -4.976312000 | 2.722126000  | H | -1.947412000 | -4.989110000 | -1.748423000 |
| C | -2.169081000 | -3.756146000 | 2.769600000  | H | -2.756276000 | -5.068407000 | -3.337296000 |
| C | -2.453466000 | -3.609356000 | 5.052638000  | H | 5.996513000  | 0.412770000  | -3.099723000 |
| C | -1.260886000 | -4.257617000 | 4.819563000  | H | 5.490379000  | -0.309100000 | -1.546425000 |
| C | -3.803436000 | 2.095726000  | -2.816771000 | H | 4.151297000  | 1.145436000  | 6.135916000  |
| C | -4.224783000 | 1.072319000  | -4.830320000 | H | 5.020279000  | -2.851291000 | 3.428142000  |
| C | -3.548546000 | 2.240680000  | -5.103026000 | H | 4.957562000  | -1.982189000 | 1.869342000  |
| C | -2.628188000 | 4.172720000  | -3.707997000 | H | 2.321806000  | -3.757911000 | 4.375777000  |
| C | -0.244403000 | 4.166807000  | -2.785205000 | H | -0.333554000 | -5.366120000 | 1.765907000  |
| C | 0.870289000  | 4.303273000  | -4.790161000 | H | 0.376061000  | -5.822076000 | 3.341140000  |
| C | -0.473627000 | 4.219273000  | -5.078493000 | H | -2.959136000 | -3.388796000 | 5.984499000  |
| C | -4.998390000 | -0.128357000 | -2.693391000 | H | -0.550375000 | -4.691293000 | 5.512130000  |
| C | -4.041283000 | -1.259641000 | -2.401820000 | H | -4.637919000 | 0.327396000  | -5.498856000 |

|   |              |              |              |                          |              |              |              |
|---|--------------|--------------|--------------|--------------------------|--------------|--------------|--------------|
| H | -3.280227000 | 2.687810000  | -6.052100000 | H                        | -0.015290000 | -0.461339000 | 4.405181000  |
| H | -3.017769000 | 4.845225000  | -4.484329000 | C                        | 0.776306000  | -0.840246000 | -3.421367000 |
| H | -2.874845000 | 4.567254000  | -2.716668000 | C                        | -0.107523000 | -0.737772000 | -2.399462000 |
| H | 1.723206000  | 4.416928000  | -5.447630000 | H                        | 1.386212000  | -1.739651000 | -3.481305000 |
| H | -0.986980000 | 4.255961000  | -6.031324000 | H                        | -0.178618000 | -1.556069000 | -1.679832000 |
| H | -5.387556000 | 0.273721000  | -1.747396000 | C                        | 0.989335000  | 0.193692000  | -4.512301000 |
| H | -5.843163000 | -0.488806000 | -3.298124000 | H                        | 2.048173000  | 0.502532000  | -4.554667000 |
| H | 2.929681000  | 5.056116000  | -3.241293000 | H                        | 0.733137000  | -0.221586000 | -5.504932000 |
| H | 2.037407000  | 4.949124000  | -1.698916000 | H                        | 0.376074000  | 1.093986000  | -4.348587000 |
| H | 2.669287000  | 3.511205000  | 6.069329000  | C                        | -1.033774000 | 0.442408000  | -2.182198000 |
| H | 0.277738000  | 4.779657000  | 5.439566000  | H                        | -0.476379000 | 1.391119000  | -2.122015000 |
| H | -0.522334000 | 5.854197000  | 3.195426000  | H                        | -1.751057000 | 0.534056000  | -3.012629000 |
| H | 0.252322000  | 5.343553000  | 1.670424000  | H                        | -1.605662000 | 0.328098000  | -1.253224000 |
| H | -2.480422000 | 3.769945000  | 4.230606000  | <u>2Iso-butylene@PPX</u> |              |              |              |
| H | -5.098368000 | 2.033721000  | 1.658598000  | Au                       | 0.341057000  | -3.989658000 | -0.749838000 |
| H | -5.208351000 | 2.906180000  | 3.212940000  | Au                       | 3.241856000  | -2.631381000 | -0.755662000 |
| H | -4.540169000 | -1.087219000 | 5.945230000  | Au                       | 4.384027000  | 0.379061000  | 0.823158000  |
| H | -4.708539000 | 1.633129000  | 5.409635000  | Au                       | -2.755287000 | -3.072855000 | 0.823280000  |
| H | -3.680412000 | -2.379198000 | -4.311549000 | Au                       | -3.414456000 | 2.705146000  | -0.862319000 |
| H | 3.868438000  | 2.316443000  | -4.192487000 | Au                       | -0.319833000 | 3.839412000  | -0.885797000 |
| H | 4.569116000  | 2.974993000  | 2.784860000  | Au                       | 2.838146000  | 3.152086000  | 0.745804000  |
| H | 4.797703000  | 3.175275000  | 4.554349000  | Au                       | -4.363147000 | -0.288526000 | 0.784063000  |
| H | -4.671318000 | -2.912175000 | 2.577544000  | N                        | -1.313350000 | -4.178856000 | -3.335692000 |
| H | -5.021788000 | -3.106245000 | 4.327713000  | N                        | 0.845529000  | -4.251454000 | -3.727429000 |
| H | 4.321515000  | -1.577769000 | 5.610137000  | N                        | 3.125561000  | -3.200990000 | -3.733646000 |
| C | -0.458887000 | -0.407320000 | 1.124718000  | N                        | 4.407483000  | -1.460809000 | -3.354238000 |
| C | -0.882013000 | -0.480840000 | 2.412125000  | N                        | -3.289476000 | -2.361034000 | -1.075074000 |
| H | -1.005302000 | -0.982794000 | 0.371781000  | N                        | 4.185998000  | 1.230755000  | -1.082822000 |
| H | -1.743374000 | -1.119132000 | 2.623177000  | N                        | 4.423860000  | 0.887393000  | 3.819581000  |
| C | 0.708179000  | 0.405756000  | 0.615928000  | N                        | 4.358599000  | -1.265880000 | 3.425879000  |
| H | 1.342184000  | 0.756699000  | 1.442112000  | N                        | 2.474702000  | -3.113463000 | 1.132278000  |
| H | 1.336269000  | -0.184202000 | -0.071195000 | N                        | 1.211614000  | -3.709462000 | 1.134611000  |
| H | 0.365392000  | 1.295064000  | 0.057493000  | N                        | -1.434020000 | -4.040099000 | 3.425394000  |
| C | -0.304505000 | 0.252017000  | 3.610864000  | N                        | -3.260399000 | -2.891803000 | 3.816118000  |
| H | 0.578156000  | 0.856442000  | 3.348749000  | N                        | -4.423182000 | 1.338820000  | -3.428990000 |
| H | -1.061090000 | 0.932963000  | 4.044087000  | N                        | -3.059123000 | 2.998667000  | -3.864480000 |



|   |              |              |              |   |              |              |              |
|---|--------------|--------------|--------------|---|--------------|--------------|--------------|
| N | -0.761413000 | 4.005392000  | -3.880630000 | C | 0.163760000  | 3.982399000  | -2.832977000 |
| N | 1.394315000  | 4.015312000  | -3.454434000 | C | 1.255325000  | 4.046136000  | -4.855392000 |
| N | -4.017837000 | -1.166290000 | -1.088047000 | C | -0.094526000 | 4.043503000  | -5.124302000 |
| N | 3.522949000  | 2.460153000  | -1.107958000 | C | -5.228703000 | 0.313658000  | -2.696721000 |
| N | 3.210725000  | 3.054912000  | 3.755428000  | C | -4.424115000 | -0.924769000 | -2.376211000 |
| N | 1.379806000  | 4.155203000  | 3.268903000  | C | 2.701607000  | 4.155114000  | -2.733906000 |
| N | -1.255091000 | 3.644720000  | 0.988959000  | C | 3.385526000  | 2.847550000  | -2.418075000 |
| N | -2.548273000 | 3.105965000  | 1.009747000  | C | 2.447049000  | 3.513331000  | 2.683391000  |
| N | -4.474023000 | 1.417425000  | 3.346268000  | C | 2.610681000  | 3.412024000  | 4.979580000  |
| N | -4.497409000 | -0.728829000 | 3.784752000  | C | 1.459767000  | 4.102575000  | 4.672651000  |
| C | -0.093736000 | -4.190338000 | -2.696896000 | C | 0.313261000  | 4.863000000  | 2.503768000  |
| C | -1.154545000 | -4.212658000 | -4.734239000 | C | -0.946801000 | 4.063928000  | 2.262102000  |
| C | 0.199503000  | -4.260312000 | -4.981122000 | C | -2.036731000 | 3.774406000  | 3.117827000  |
| C | 2.307932000  | -4.426261000 | -3.546018000 | C | -3.021315000 | 3.174093000  | 2.297458000  |
| C | 3.661740000  | -2.420101000 | -2.707571000 | C | -4.427239000 | 2.714457000  | 2.607404000  |
| C | 4.344400000  | -1.622200000 | -4.750841000 | C | -4.497341000 | 0.185788000  | 2.733439000  |
| C | 3.541349000  | -2.715376000 | -4.990351000 | C | -4.480246000 | -0.057910000 | 5.024843000  |
| C | -2.626474000 | -4.206517000 | -2.621356000 | C | -4.461524000 | 1.290502000  | 4.747590000  |
| C | -3.250114000 | -2.854774000 | -2.357291000 | C | -3.961460000 | -1.973771000 | -3.207093000 |
| C | 5.214221000  | -0.416482000 | -2.649758000 | C | 3.972936000  | 1.865725000  | -3.250462000 |
| C | 4.456851000  | 0.862012000  | -2.377666000 | C | 4.513285000  | 2.355015000  | 3.648760000  |
| C | 4.419829000  | -0.049796000 | 2.787803000  | C | -4.562225000 | -2.202222000 | 3.643272000  |
| C | 4.366993000  | 0.244365000  | 5.072540000  | H | -1.993077000 | -4.245839000 | -5.418694000 |
| C | 4.323967000  | -1.109279000 | 4.823070000  | H | 0.733791000  | -4.344624000 | -5.919327000 |
| C | 4.329073000  | -2.577213000 | 2.713739000  | H | 2.648350000  | -5.166184000 | -4.283354000 |
| C | 2.934430000  | -3.076015000 | 2.425338000  | H | 2.484483000  | -4.805481000 | -2.533978000 |
| C | 1.959642000  | -3.648462000 | 3.275060000  | H | 4.892946000  | -0.990469000 | -5.438373000 |
| C | 0.893255000  | -4.034444000 | 2.428885000  | H | 3.276437000  | -3.195183000 | -5.924321000 |
| C | -0.367613000 | -4.811195000 | 2.717320000  | H | -2.454485000 | -4.716361000 | -1.662609000 |
| C | -2.471031000 | -3.401490000 | 2.785892000  | H | -3.307578000 | -4.822910000 | -3.226455000 |
| C | -2.703769000 | -3.216051000 | 5.070495000  | H | 6.099768000  | -0.219461000 | -3.271719000 |
| C | -1.555655000 | -3.935232000 | 4.822954000  | H | 5.545932000  | -0.851241000 | -1.695927000 |
| C | -3.734016000 | 2.363298000  | -2.820656000 | H | 4.406981000  | 0.780771000  | 6.012428000  |
| C | -4.200606000 | 1.327471000  | -4.818503000 | H | 4.875970000  | -3.299030000 | 3.337764000  |
| C | -3.348752000 | 2.372531000  | -5.094842000 | H | 4.874341000  | -2.446968000 | 1.768037000  |
| C | -2.227614000 | 4.216296000  | -3.731808000 | H | 2.035210000  | -3.804955000 | 4.346120000  |

|   |              |              |              |   |              |              |              |
|---|--------------|--------------|--------------|---|--------------|--------------|--------------|
| H | -0.800575000 | -5.162630000 | 1.770052000  | H | 0.724388000  | 1.543441000  | 3.526450000  |
| H | -0.139042000 | -5.687543000 | 3.341846000  | H | 1.462980000  | 0.018779000  | 4.059480000  |
| H | -3.177613000 | -2.958769000 | 6.009606000  | H | 1.992696000  | 0.780548000  | 2.524322000  |
| H | -0.860258000 | -4.404337000 | 5.507717000  | H | -1.294721000 | -0.624784000 | 4.046514000  |
| H | -4.686026000 | 0.622749000  | -5.482004000 | H | -1.702462000 | 0.842429000  | 3.125572000  |
| H | -2.970969000 | 2.733328000  | -6.043169000 | H | -2.018248000 | -0.765718000 | 2.415079000  |
| H | -2.534048000 | 4.923041000  | -4.515381000 | C | 0.394167000  | -1.191660000 | -3.007318000 |
| H | -2.415668000 | 4.656062000  | -2.746757000 | C | 0.078637000  | -0.156062000 | -2.195229000 |
| H | 2.103539000  | 4.107157000  | -5.525939000 | H | -0.362974000 | -1.678634000 | -3.623291000 |
| H | -0.616367000 | 4.108983000  | -6.071002000 | H | 1.419542000  | -1.536398000 | -3.091449000 |
| H | -5.584417000 | 0.778047000  | -1.766010000 | C | 1.115779000  | 0.630869000  | -1.429433000 |
| H | -6.096688000 | 0.065697000  | -3.324349000 | C | -1.323637000 | 0.379110000  | -2.081288000 |
| H | 3.343106000  | 4.788730000  | -3.364037000 | H | 1.368259000  | 1.523687000  | -2.016927000 |
| H | 2.495078000  | 4.690390000  | -1.796045000 | H | 0.732740000  | 0.991288000  | -0.462579000 |
| H | 3.058513000  | 3.192564000  | 5.940801000  | H | 2.029806000  | 0.050459000  | -1.252537000 |
| H | 0.736428000  | 4.583853000  | 5.318837000  | H | -1.692631000 | 0.310550000  | -1.042958000 |
| H | 0.070724000  | 5.779719000  | 3.061697000  | H | -1.309158000 | 1.448920000  | -2.344251000 |
| H | 0.750733000  | 5.152158000  | 1.537777000  | H | -2.024691000 | -0.142777000 | -2.743381000 |
| H | -2.120689000 | 4.010284000  | 4.173705000  |   |              |              |              |
| H | -4.982224000 | 2.574948000  | 1.668944000  |   |              |              |              |
| H | -4.953183000 | 3.460526000  | 3.220129000  |   |              |              |              |
| H | -4.527442000 | -0.574681000 | 5.975304000  |   |              |              |              |
| H | -4.482257000 | 2.144941000  | 5.412564000  |   |              |              |              |
| H | -4.142160000 | -2.094710000 | -4.270073000 |   |              |              |              |
| H | 4.060275000  | 1.890415000  | -4.331541000 |   |              |              |              |
| H | 4.944469000  | 2.568478000  | 2.664988000  |   |              |              |              |
| H | 5.171307000  | 2.747915000  | 4.435629000  |   |              |              |              |
| H | -4.951550000 | -2.441116000 | 2.647892000  |   |              |              |              |
| H | -5.247780000 | -2.584498000 | 4.411855000  |   |              |              |              |
| H | 4.314309000  | -1.949665000 | 5.505905000  |   |              |              |              |
| C | 0.333491000  | -0.813867000 | 1.239601000  |   |              |              |              |
| C | 0.060356000  | -0.185082000 | 2.406106000  |   |              |              |              |
| H | -0.427118000 | -1.359058000 | 0.677615000  |   |              |              |              |
| H | 1.337666000  | -0.798107000 | 0.817225000  |   |              |              |              |
| C | 1.127471000  | 0.581244000  | 3.168314000  |   |              |              |              |
| C | -1.320524000 | -0.188932000 | 3.030264000  |   |              |              |              |
